# Supplementary material
Source: publisher figshare collection journal article supplement (https://acs.figshare.com/ndownloader/files/26754404)
Supplement: Supplementary file 1 [file 26754404]

## Sheet: S2
	S2. Table S2 The Biological Process (BP) Associated with the Differentially Expressed Proteins in the AD/WT Group.
	Se-methylselenocysteine (SMC) Improves Cognitive Deficits by Attenuating Synaptic and Metabolic Abnormalities in Alzheimer's Mice Model: A Proteomic Study Xiubo Du1#, Qingqing Shi1#, Yuxi Zhao1, Yongli Xie1, Xuexia Li1, Qiong Liu1, Javed Iqbal1, Huajie Zhang1,2, Xukun Liu1,3, Liming Shen1* 1Shenzhen Key Laboratory of Marine Biotechnology and Ecology, College of Life Science and Oceanography, Shen…
#term ID	Term description	Observed gene count	Background gene count	False discovery rate	Matching proteins
GO:0006091	generation of precursor metabolites and energy	28	295	2.68e-17	Adh5,Aldh5a1,Aldoa,Atp5o,Cox7a2l,Cs,Dlat,Dld,Etfa,Gapdh,Gbas,Glrx5,Gpd1,Mdh2,Ndufb8,Ndufs2,Ndufv1,Ogdh,Pdha1,Pfkp,Pgam1,Pgm2,Pkm,Pygb,Sdha,Stoml2,Tpi1,Uqcrc1
GO:0009987	cellular process	160	12459	2.68e-17	Abat,Abl2,Acaa1a,Actr3,Adam22,Adh5,Adi1,Adk,Adssl1,Afg3l2,Aldh5a1,Aldoa,Ap2a1,Ap2b1,Ap3d1,Armt1,Atl3,Atp1a3,Atp1b1,Atp1b2,Atp1b3,Atp2a2,Atp5o,Atp6v1b2,Blmh,Cadm1,Camkv,Cand1,Cap2,Capzb,Cct3,Cct7,Celf4,Cfl1,Ckmt1,Cltc,Cnp,Cops8,Cox7a2l,Cplx1,Cs,Ctbp1,Ctsb,Ctsd,Dctn3,Ddah1,Dlat,Dld,Dnajc11,Dpp6,Dpysl3,Dstn,Echs1,Eef1a1,Eef1a2,Eef1g,Eef2,Efr3b,Eif3f,Etfa,Fscn1,Gad1,Gapdh,Gbas,Gdi2,Glrx5,Gmps,Gnai2,G…
GO:0009167	purine ribonucleoside monophosphate metabolic process	24	196	2.87e-17	Adk,Adssl1,Aldoa,Atp1b1,Atp5o,Atp6v1b2,Dld,Gapdh,Gbas,Gmps,Hspa8,Ndufb8,Ndufs2,Ndufv1,Ogdh,Pfkp,Pgam1,Pkm,Prps1,Sdha,Stoml2,Tpi1,Uqcrc1,Vcp
GO:0017144	drug metabolic process	33	494	3.41e-17	Adh5,Adi1,Adk,Adssl1,Aldh5a1,Aldoa,Atp1b1,Atp5o,Atp6v1b2,Cs,Ddah1,Dlat,Dld,Gapdh,Gbas,Hspa8,Mdh2,Ndufb8,Ndufs2,Ndufv1,Ogdh,Pdha1,Pfkp,Pgam1,Pkm,Prdx5,Prps1,Qdpr,Sdha,Stoml2,Tpi1,Uqcrc1,Vcp
GO:0009117	nucleotide metabolic process	32	488	1.59e-16	Adk,Adssl1,Aldoa,Atp1b1,Atp5o,Atp6v1b2,Cnp,Cs,Dlat,Dld,Gapdh,Gbas,Gmps,Gpd1,Hspa8,Kcnab2,Mdh2,Ndufb8,Ndufs2,Ndufv1,Ogdh,Pdha1,Pfkp,Pgam1,Pkm,Prdx5,Prps1,Sdha,Stoml2,Tpi1,Uqcrc1,Vcp
GO:0044281	small molecule metabolic process	51	1489	5.34e-16	Abat,Acaa1a,Adh5,Adi1,Adk,Adssl1,Aldh5a1,Aldoa,Atp1b1,Atp5o,Atp6v1b2,Blmh,Cnp,Cs,Ddah1,Dlat,Dld,Echs1,Etfa,Gad1,Gapdh,Gbas,Gmps,Got2,Gpd1,Hspa8,Itpka,Kcnab2,Marc2,Mdh2,Ndufab1,Ndufb8,Ndufs2,Ndufv1,Ogdh,P4hb,Pdha1,Pfkp,Pgam1,Pgm2,Pkm,Prdx5,Prps1,Psat1,Qdpr,Sdha,Stoml2,Tpi1,Uqcrc1,Vars,Vcp
GO:0009150	purine ribonucleotide metabolic process	27	356	2.59e-15	Adk,Adssl1,Aldoa,Atp1b1,Atp5o,Atp6v1b2,Cs,Dlat,Dld,Gapdh,Gbas,Gmps,Hspa8,Ndufb8,Ndufs2,Ndufv1,Ogdh,Pdha1,Pfkp,Pgam1,Pkm,Prps1,Sdha,Stoml2,Tpi1,Uqcrc1,Vcp
GO:0046034	ATP metabolic process	20	162	8.16e-15	Aldoa,Atp1b1,Atp5o,Atp6v1b2,Dld,Gapdh,Gbas,Hspa8,Ndufb8,Ndufs2,Ndufv1,Ogdh,Pfkp,Pgam1,Pkm,Sdha,Stoml2,Tpi1,Uqcrc1,Vcp
GO:0019637	organophosphate metabolic process	36	775	1.16e-14	Adk,Adssl1,Aldh5a1,Aldoa,Atp1b1,Atp5o,Atp6v1b2,Cnp,Cs,Dlat,Dld,Efr3b,Gapdh,Gbas,Gmps,Gpd1,Hspa8,Itpka,Kcnab2,Mdh2,Ndufab1,Ndufb8,Ndufs2,Ndufv1,Ogdh,Pdha1,Pfkp,Pgam1,Pkm,Prdx5,Prps1,Sdha,Stoml2,Tpi1,Uqcrc1,Vcp
GO:0009144	purine nucleoside triphosphate metabolic process	21	195	1.35e-14	Adk,Aldoa,Atp1b1,Atp5o,Atp6v1b2,Dld,Gapdh,Gbas,Hspa8,Ndufb8,Ndufs2,Ndufv1,Ogdh,Pfkp,Pgam1,Pkm,Sdha,Stoml2,Tpi1,Uqcrc1,Vcp
GO:0055114	oxidation-reduction process	37	898	1.23e-13	Acaa1a,Adh5,Adi1,Aldh5a1,Bdh1,Cox7a2l,Cs,Ctbp1,Dlat,Dld,Echs1,Etfa,Gapdh,Gfod1,Glrx5,Gpd1,Kcnab2,Marc2,Mdh2,Ndufab1,Ndufb10,Ndufb8,Ndufs2,Ndufs7,Ndufs8,Ndufv1,Ogdh,P4hb,Pdha1,Pgm2,Prdx5,Pygb,Qdpr,Sdha,Selenbp1,Uqcrc1,Vat1
GO:0046496	nicotinamide nucleotide metabolic process	15	101	4.38e-12	Aldoa,Dlat,Dld,Gapdh,Gpd1,Kcnab2,Mdh2,Ogdh,Pdha1,Pfkp,Pgam1,Pkm,Prdx5,Tpi1,Vcp
GO:0009152	purine ribonucleotide biosynthetic process	17	154	6.36e-12	Adk,Adssl1,Aldoa,Atp5o,Dlat,Dld,Gapdh,Gbas,Gmps,Ogdh,Pdha1,Pfkp,Pgam1,Pkm,Prps1,Stoml2,Tpi1
GO:1901564	organonitrogen compound metabolic process	81	4480	1.61e-11	Abat,Abl2,Adam22,Adh5,Adi1,Adk,Adssl1,Afg3l2,Aldh5a1,Aldoa,Armt1,Atp1b1,Atp5o,Atp6v1b2,Blmh,Camkv,Cand1,Cfl1,Cops8,Cs,Ctbp1,Ctsb,Ctsd,Ddah1,Dlat,Dld,Dpp6,Eef1a1,Eef1a2,Eef1g,Eef2,Eif3f,Gad1,Gapdh,Gbas,Glrx5,Gmps,Got2,Gpd1,Gstm5,Hspa8,Itpka,Kcnab2,Map2k1,Mdh2,Ndufab1,Ndufb8,Ndufs2,Ndufv1,Ogdh,P4hb,Pcbp2,Pdha1,Pebp1,Pfkp,Pgam1,Pkm,Ppp2r1a,Ppp3r1,Prdx5,Prkcg,Prps1,Psat1,Qdpr,Rab3b,Rab7,Rpl23,Rplp1,R…
GO:0009168	purine ribonucleoside monophosphate biosynthetic process	14	91	1.66e-11	Adk,Adssl1,Aldoa,Atp5o,Gapdh,Gbas,Gmps,Ogdh,Pfkp,Pgam1,Pkm,Prps1,Stoml2,Tpi1
GO:0006082	organic acid metabolic process	32	794	1.69e-11	Abat,Acaa1a,Adi1,Adssl1,Aldh5a1,Aldoa,Blmh,Cs,Ddah1,Dlat,Dld,Echs1,Etfa,Gad1,Gapdh,Gmps,Got2,Marc2,Mdh2,Ndufab1,Ogdh,P4hb,Pdha1,Pfkp,Pgam1,Pkm,Prps1,Psat1,Qdpr,Sdha,Tpi1,Vars
GO:0043436	oxoacid metabolic process	31	781	5.42e-11	Abat,Acaa1a,Adi1,Adssl1,Aldh5a1,Aldoa,Blmh,Cs,Ddah1,Dlat,Dld,Echs1,Etfa,Gad1,Gapdh,Gmps,Got2,Marc2,Mdh2,Ndufab1,Ogdh,P4hb,Pdha1,Pfkp,Pgam1,Pkm,Psat1,Qdpr,Sdha,Tpi1,Vars
GO:0019752	carboxylic acid metabolic process	30	738	7.3e-11	Abat,Acaa1a,Adi1,Adssl1,Aldh5a1,Aldoa,Blmh,Cs,Ddah1,Dlat,Dld,Echs1,Etfa,Gad1,Gapdh,Gmps,Got2,Mdh2,Ndufab1,Ogdh,P4hb,Pdha1,Pfkp,Pgam1,Pkm,Psat1,Qdpr,Sdha,Tpi1,Vars
GO:0006796	phosphate-containing compound metabolic process	46	1758	1.34e-10	Abl2,Adk,Adssl1,Aldh5a1,Aldoa,Atp1b1,Atp5o,Atp6v1b2,Camkv,Cfl1,Ckmt1,Cnp,Cs,Dlat,Dld,Efr3b,Gapdh,Gbas,Gmps,Gpd1,Hspa8,Itpka,Kcnab2,Map2k1,Mdh2,Ndufab1,Ndufb8,Ndufs2,Ndufv1,Ogdh,Pdha1,Pebp1,Pfkp,Pgam1,Pkm,Ppp2r1a,Ppp3r1,Prdx5,Prkcg,Prps1,Sdha,Stoml2,Tpi1,Uqcrc1,Vcp,Wnk2
GO:0051186	cofactor metabolic process	21	403	2.96e-09	Aldh5a1,Aldoa,Cs,Dlat,Dld,Eef1g,Gapdh,Got2,Gpd1,Gstm5,Kcnab2,Mdh2,Ogdh,Pdha1,Pfkp,Pgam1,Pkm,Prdx5,Qdpr,Tpi1,Vcp
GO:0043933	protein-containing complex subunit organization	39	1453	4.18e-09	Aldh5a1,Aldoa,Ap2b1,Atl3,Cand1,Cct3,Celf4,Cfl1,Cltc,Cops8,Cox7a2l,Dpysl3,Dstn,Eef1a1,Hspa8,Kcnab2,Lzts3,Map2k1,Ndufab1,Ndufb10,Ndufb8,Ndufs7,Ndufs8,Pfkp,Pkm,Ppp2r1a,Rac1,Rims1,Rpl23,Rps17,Ruvbl2,Samm50,Sept4,Sept7,Smarcc2,Stoml2,Syt1,Vbp1,Vcp
GO:1901135	carbohydrate derivative metabolic process	30	882	4.32e-09	Adk,Adssl1,Aldh5a1,Aldoa,Atp1b1,Atp5o,Atp6v1b2,Cs,Dlat,Dld,Gapdh,Gbas,Gmps,Gpd1,Hspa8,Ndufab1,Ndufb8,Ndufs2,Ndufv1,Ogdh,Pdha1,Pfkp,Pgam1,Pkm,Prps1,Sdha,Stoml2,Tpi1,Uqcrc1,Vcp
GO:0006732	coenzyme metabolic process	17	261	8.69e-09	Aldoa,Cs,Dlat,Dld,Gapdh,Gpd1,Kcnab2,Mdh2,Ogdh,Pdha1,Pfkp,Pgam1,Pkm,Prdx5,Qdpr,Tpi1,Vcp
GO:0009145	purine nucleoside triphosphate biosynthetic process	11	81	1.43e-08	Adk,Aldoa,Atp5o,Gapdh,Gbas,Ogdh,Pfkp,Pgam1,Pkm,Stoml2,Tpi1
GO:0015980	energy derivation by oxidation of organic compounds	15	197	1.43e-08	Aldh5a1,Cs,Dlat,Dld,Gpd1,Mdh2,Ndufb8,Ndufs2,Ndufv1,Ogdh,Pdha1,Pgm2,Pygb,Sdha,Uqcrc1
GO:1901566	organonitrogen compound biosynthetic process	33	1122	1.54e-08	Abat,Adi1,Adk,Adssl1,Aldoa,Atp5o,Dlat,Dld,Eef1a1,Eef1a2,Eef1g,Eef2,Eif3f,Gad1,Gapdh,Gbas,Gmps,Got2,Ogdh,Pdha1,Pfkp,Pgam1,Pkm,Prps1,Psat1,Qdpr,Rpl23,Rplp1,Rps17,Stoml2,Tpi1,Vars,Vcp
GO:0006090	pyruvate metabolic process	10	62	2.04e-08	Aldoa,Dlat,Dld,Gapdh,Ogdh,Pdha1,Pfkp,Pgam1,Pkm,Tpi1
GO:0045333	cellular respiration	13	140	2.3e-08	Aldh5a1,Cs,Dlat,Dld,Gpd1,Mdh2,Ndufb8,Ndufs2,Ndufv1,Ogdh,Pdha1,Sdha,Uqcrc1
GO:0065008	regulation of biological quality	62	3420	2.82e-08	Abat,Abl2,Actr3,Adh5,Afg3l2,Aldh5a1,Aldoa,Ap3d1,Atp1a3,Atp1b1,Atp1b2,Atp1b3,Atp2a2,Capzb,Cct3,Cct7,Celf4,Cfl1,Cnp,Cplx1,Ddah1,Dld,Dpp6,Dstn,Gad1,Gapdh,Glrx5,Gnai2,Got2,Hspa8,Isoc2a,Itpka,L1cam,Lzts3,Mag,Map2k1,Ncald,Ncdn,Nckap1,P4hb,Pebp1,Pfn2,Prdx5,Rab3a,Rab3b,Rab7,Rac1,Rap1gap2,Rap2b,Rims1,Rpl23,Rps17,Sept7,Slc25a5,Stoml2,Syt1,Tardbp,Tcp1,Ube2v2,Vars,Vcp,Wnk2
GO:0044283	small molecule biosynthetic process	21	481	5.28e-08	Abat,Adi1,Adk,Aldoa,Cnp,Gad1,Gapdh,Gmps,Got2,Gpd1,Itpka,Ndufab1,Ogdh,Pfkp,Pgam1,Pkm,Prps1,Psat1,Qdpr,Tpi1,Vcp
GO:0006754	ATP biosynthetic process	10	70	5.49e-08	Aldoa,Atp5o,Gapdh,Gbas,Ogdh,Pfkp,Pgam1,Pkm,Stoml2,Tpi1
GO:0090407	organophosphate biosynthetic process	19	394	7e-08	Adk,Adssl1,Aldoa,Atp5o,Dlat,Dld,Gapdh,Gbas,Gmps,Itpka,Ndufab1,Ogdh,Pdha1,Pfkp,Pgam1,Pkm,Prps1,Stoml2,Tpi1
GO:0065003	protein-containing complex assembly	34	1292	1.13e-07	Aldh5a1,Aldoa,Ap2b1,Atl3,Cand1,Cct3,Celf4,Cltc,Cops8,Cox7a2l,Dpysl3,Eef1a1,Kcnab2,Lzts3,Map2k1,Ndufab1,Ndufb10,Ndufb8,Ndufs7,Ndufs8,Pfkp,Pkm,Ppp2r1a,Rac1,Rims1,Rps17,Ruvbl2,Samm50,Sept4,Sept7,Stoml2,Syt1,Vbp1,Vcp
GO:0016043	cellular component organization	72	4560	2.26e-07	Abl2,Actr3,Afg3l2,Aldh5a1,Aldoa,Ap2b1,Ap3d1,Atl3,Atp1a3,Atp2a2,Cadm1,Cand1,Cap2,Capzb,Cct3,Celf4,Cfl1,Cltc,Cnp,Cops8,Cox7a2l,Ctbp1,Ctsd,Dnajc11,Dpysl3,Dstn,Eef1a1,Fscn1,Gapdh,Gnao1,Hspa8,Itpka,Kcnab2,Kpnb1,L1cam,Lzts3,Mag,Map2k1,Map7d1,Ncdn,Nckap1,Ndufab1,Ndufb10,Ndufb8,Ndufs7,Ndufs8,Pfkp,Pfn2,Pkm,Ppp2r1a,Rab3a,Rab3b,Rab7,Rac1,Rap1gap2,Rims1,Rpl23,Rps17,Ruvbl2,Samm50,Sept4,Sept7,Slc25a5,Smarcc2,S…
GO:0022607	cellular component assembly	43	2015	2.81e-07	Abl2,Actr3,Aldh5a1,Aldoa,Ap2b1,Atl3,Cadm1,Cand1,Capzb,Cct3,Celf4,Cltc,Cops8,Cox7a2l,Ctsd,Dpysl3,Eef1a1,Fscn1,Kcnab2,Kpnb1,Lzts3,Map2k1,Nckap1,Ndufab1,Ndufb10,Ndufb8,Ndufs7,Ndufs8,Pfkp,Pkm,Ppp2r1a,Rab7,Rac1,Rims1,Rps17,Ruvbl2,Samm50,Sept4,Sept7,Stoml2,Syt1,Vbp1,Vcp
GO:0006119	oxidative phosphorylation	9	63	3.38e-07	Atp5o,Dld,Gbas,Ndufb8,Ndufs2,Ndufv1,Sdha,Stoml2,Uqcrc1
GO:0016310	phosphorylation	29	1034	4.81e-07	Abl2,Adk,Aldoa,Atp5o,Camkv,Cfl1,Ckmt1,Dld,Efr3b,Gapdh,Gbas,Hspa8,Itpka,Map2k1,Ndufb8,Ndufs2,Ndufv1,Ogdh,Pebp1,Pfkp,Pgam1,Pkm,Prkcg,Prps1,Sdha,Stoml2,Tpi1,Uqcrc1,Wnk2
GO:0022900	electron transport chain	11	120	4.85e-07	Aldh5a1,Cox7a2l,Dld,Etfa,Glrx5,Gpd1,Ndufb8,Ndufs2,Ndufv1,Sdha,Uqcrc1
GO:0008152	metabolic process	104	8164	1e-06	Abat,Abl2,Acaa1a,Adam22,Adh5,Adi1,Adk,Adssl1,Afg3l2,Aldh5a1,Aldoa,Ap2b1,Armt1,Atp1b1,Atp5o,Atp6v1b2,Bdh1,Blmh,Camkv,Cand1,Celf4,Cfl1,Ckmt1,Cltc,Cnp,Cops8,Cox7a2l,Cs,Ctbp1,Ctsb,Ctsd,Ddah1,Dlat,Dld,Dpp6,Echs1,Eef1a1,Eef1a2,Eef1g,Eef2,Efr3b,Eif3f,Etfa,Gad1,Gapdh,Gbas,Gfod1,Glrx5,Gmps,Got2,Gpd1,Gstm5,Hspa8,Isoc2a,Itpka,Kcnab2,Map2k1,Marc2,Mdh2,Ndufab1,Ndufb10,Ndufb8,Ndufs2,Ndufs7,Ndufs8,Ndufv1,Ogdh,P…
GO:0009108	coenzyme biosynthetic process	11	130	1e-06	Aldoa,Dlat,Dld,Gapdh,Ogdh,Pdha1,Pfkp,Pgam1,Pkm,Qdpr,Tpi1
GO:0005975	carbohydrate metabolic process	17	381	1.32e-06	Aldh5a1,Aldoa,Cs,Dlat,Gapdh,Gpd1,Itpka,Mdh2,Ndufab1,Ogdh,Pdha1,Pfkp,Pgam1,Pgm2,Pkm,Pygb,Tpi1
GO:0034404	nucleobase-containing small molecule biosynthetic process	11	134	1.32e-06	Adk,Aldoa,Cnp,Gapdh,Gmps,Ogdh,Pfkp,Pgam1,Pkm,Tpi1,Vcp
GO:0120035	regulation of plasma membrane bounded cell projection organization	23	712	1.48e-06	Abl2,Actr3,Ap2a1,Capzb,Cfl1,Dpysl3,Eef1a1,Fscn1,Itpka,L1cam,Lzts3,Mag,Map2k1,Nckap1,Ntm,Pfn2,Rac1,Rap1gap2,Rims1,Sept7,Syt1,Ube2v2,Vdac3
GO:0016052	carbohydrate catabolic process	9	80	1.94e-06	Aldoa,Gapdh,Ogdh,Pfkp,Pgam1,Pgm2,Pkm,Pygb,Tpi1
GO:1901137	carbohydrate derivative biosynthetic process	19	498	2.03e-06	Adk,Adssl1,Aldoa,Atp5o,Dlat,Dld,Gapdh,Gbas,Gmps,Ndufab1,Ogdh,Pdha1,Pfkp,Pgam1,Pkm,Prps1,Stoml2,Tpi1,Vcp
GO:0006096	glycolytic process	7	37	2.53e-06	Aldoa,Gapdh,Ogdh,Pfkp,Pgam1,Pkm,Tpi1
GO:0006757	ATP generation from ADP	7	37	2.53e-06	Aldoa,Gapdh,Ogdh,Pfkp,Pgam1,Pkm,Tpi1
GO:0051130	positive regulation of cellular component organization	30	1197	2.53e-06	Abl2,Actr3,Ap2a1,Ap2b1,Atl3,Cand1,Cct3,Cct7,Cfl1,Ctbp1,Dpysl3,Dstn,Eef1a1,Fscn1,Hspa8,Itpka,L1cam,Map2k1,Nckap1,Pebp1,Pfn2,Rac1,Rims1,Ruvbl2,Sept7,Stoml2,Syt1,Tcp1,Ube2v2,Vcp
GO:0099131	ATP hydrolysis coupled ion transmembrane transport	8	60	3.12e-06	Atp1a3,Atp1b1,Atp1b2,Atp1b3,Atp2a2,Atp5o,Atp6v1b2,Atp6v1f
GO:0099132	ATP hydrolysis coupled cation transmembrane transport	8	62	3.79e-06	Atp1a3,Atp1b1,Atp1b2,Atp1b3,Atp2a2,Atp5o,Atp6v1b2,Atp6v1f
GO:0009166	nucleotide catabolic process	9	90	4.33e-06	Aldoa,Cnp,Gapdh,Ogdh,Pfkp,Pgam1,Pkm,Tpi1,Vcp
GO:0042866	pyruvate biosynthetic process	7	41	4.33e-06	Aldoa,Gapdh,Ogdh,Pfkp,Pgam1,Pkm,Tpi1
GO:0006006	glucose metabolic process	9	91	4.67e-06	Aldh5a1,Dlat,Gapdh,Gpd1,Pdha1,Pgam1,Pgm2,Pkm,Tpi1
GO:0051128	regulation of cellular component organization	44	2337	4.91e-06	Abl2,Actr3,Aldoa,Ap2a1,Ap2b1,Atl3,Cand1,Capzb,Cct3,Cct7,Cfl1,Cltc,Ctbp1,Dpysl3,Dstn,Eef1a1,Fscn1,Hspa8,Hsph1,Itpka,L1cam,Lzts3,Mag,Map2k1,Nckap1,Ntm,Pebp1,Pfn2,Prkcg,Rab3a,Rac1,Rap1gap2,Rims1,Ruvbl2,Sept7,Slc25a5,Stoml2,Syt1,Tcp1,Ube2v2,Vat1,Vcp,Vdac2,Vdac3
GO:0019318	hexose metabolic process	10	123	4.99e-06	Aldh5a1,Aldoa,Dlat,Gapdh,Gpd1,Pdha1,Pgam1,Pgm2,Pkm,Tpi1
GO:0032787	monocarboxylic acid metabolic process	17	426	4.99e-06	Abat,Acaa1a,Aldh5a1,Aldoa,Dlat,Dld,Echs1,Etfa,Gad1,Gapdh,Ndufab1,Ogdh,Pdha1,Pfkp,Pgam1,Pkm,Tpi1
GO:0007399	nervous system development	42	2181	5.43e-06	Abat,Abl2,Actr3,Adam22,Afg3l2,Aldh5a1,Ap2a1,Atp1a3,Cadm1,Capzb,Cfl1,Cnp,Dpysl3,Eef1a1,Eef2,Gnao1,Itpka,Kbp,L1cam,Lzts3,Mag,Map2k1,Ncdn,Nckap1,Ntm,Ogdh,Pebp1,Ppp3r1,Prkcg,Prps1,Rab3a,Rac1,Rap1gap2,Rims1,Sdha,Sept4,Sept7,Smarcc2,Syt1,Tubb3,Ube2v2,Uchl1
GO:0065007	biological regulation	118	10168	6.94e-06	Abat,Abl2,Actr3,Adh5,Adk,Afg3l2,Aldh5a1,Aldoa,Ap2a1,Ap2a2,Ap2b1,Ap3d1,Armt1,Atl3,Atp1a3,Atp1b1,Atp1b2,Atp1b3,Atp2a2,Cadm1,Camkv,Cand1,Cap2,Capzb,Cct3,Cct7,Celf4,Cfl1,Cisd1,Ckmt1,Cltc,Cnp,Cops8,Cox7a2l,Cplx1,Crip2,Ctbp1,Ctsb,Ddah1,Dld,Dpp6,Dpysl3,Dstn,Eef1a1,Eef1a2,Eef2,Fscn1,Gad1,Gapdh,Gbas,Gdi2,Glrx5,Gnai2,Gnao1,Gnaz,Got2,Gpd1,Hp,Hspa8,Hsph1,Isoc2a,Itpka,Kcnab2,Kpnb1,L1cam,Lxn,Lzts3,Mag,Map2k1,M…
GO:0044237	cellular metabolic process	94	7348	7.26e-06	Abat,Abl2,Acaa1a,Adh5,Adi1,Adk,Adssl1,Afg3l2,Aldh5a1,Aldoa,Ap2b1,Armt1,Atp1b1,Atp5o,Atp6v1b2,Blmh,Camkv,Cand1,Celf4,Cfl1,Ckmt1,Cltc,Cnp,Cops8,Cox7a2l,Cs,Ctbp1,Ctsb,Ctsd,Ddah1,Dlat,Dld,Echs1,Eef1a1,Eef1a2,Eef1g,Eef2,Efr3b,Eif3f,Etfa,Gad1,Gapdh,Gbas,Glrx5,Gmps,Got2,Gpd1,Gstm5,Hspa8,Itpka,Kcnab2,Map2k1,Marc2,Mdh2,Ndufab1,Ndufb8,Ndufs2,Ndufv1,Ogdh,P4hb,Pcbp2,Pdha1,Pebp1,Pfkp,Pgam1,Pgm2,Pkm,Ppp2r1a,Pp…
GO:0006099	tricarboxylic acid cycle	6	27	8.15e-06	Cs,Dlat,Mdh2,Ogdh,Pdha1,Sdha
GO:0006520	cellular amino acid metabolic process	13	253	9.62e-06	Abat,Adi1,Adssl1,Aldh5a1,Blmh,Ddah1,Gad1,Gmps,Got2,P4hb,Psat1,Qdpr,Vars
GO:0046394	carboxylic acid biosynthetic process	13	256	1.08e-05	Abat,Adi1,Aldoa,Gad1,Gapdh,Got2,Ndufab1,Ogdh,Pfkp,Pgam1,Pkm,Psat1,Tpi1
GO:0016999	antibiotic metabolic process	9	107	1.44e-05	Adh5,Aldh5a1,Cs,Dlat,Mdh2,Ogdh,Pdha1,Prdx5,Sdha
GO:0006101	citrate metabolic process	6	31	1.54e-05	Cs,Dlat,Mdh2,Ogdh,Pdha1,Sdha
GO:0022904	respiratory electron transport chain	8	78	1.54e-05	Aldh5a1,Dld,Gpd1,Ndufb8,Ndufs2,Ndufv1,Sdha,Uqcrc1
GO:0044248	cellular catabolic process	30	1321	1.54e-05	Abat,Acaa1a,Adh5,Aldh5a1,Aldoa,Blmh,Cltc,Cnp,Ctsb,Ctsd,Ddah1,Echs1,Etfa,Gapdh,Got2,Gstm5,Hspa8,Ogdh,Pcbp2,Pfkp,Pgam1,Pkm,Prdx5,Pygb,Qdpr,Rab7,Tpi1,Uba1,Uchl1,Vcp
GO:0009056	catabolic process	32	1478	1.65e-05	Abat,Acaa1a,Adh5,Aldh5a1,Aldoa,Blmh,Cltc,Cnp,Ctsb,Ctsd,Ddah1,Echs1,Etfa,Gapdh,Got2,Gpd1,Gstm5,Hspa8,Ogdh,Pcbp2,Pfkp,Pgam1,Pgm2,Pkm,Prdx5,Pygb,Qdpr,Rab7,Tpi1,Uba1,Uchl1,Vcp
GO:0048522	positive regulation of cellular process	69	4827	1.83e-05	Abat,Abl2,Actr3,Adk,Aldoa,Ap2a1,Ap2b1,Ap3d1,Atl3,Atp1b1,Atp1b2,Atp1b3,Cadm1,Cand1,Cct3,Cct7,Celf4,Cfl1,Cops8,Crip2,Ctbp1,Ddah1,Dpp6,Dpysl3,Dstn,Eef1a1,Eef1a2,Eef2,Fscn1,Gapdh,Gnai2,Gpd1,Hp,Hspa8,Hsph1,Itpka,L1cam,Mag,Map2k1,Mapre3,Nckap1,Pebp1,Pfn2,Ppp2r1a,Ppp3r1,Prkcg,Rab3a,Rab3b,Rab7,Rac1,Rap2b,Rhob,Rims1,Rpl23,Rplp1,Ruvbl2,Sept4,Sept5,Sept7,Slc25a5,Smarcc2,Stoml2,Syt1,Tardbp,Tcp1,Ube2m,Ube2v2,…
GO:0019359	nicotinamide nucleotide biosynthetic process	7	54	1.84e-05	Aldoa,Gapdh,Ogdh,Pfkp,Pgam1,Pkm,Tpi1
GO:0046434	organophosphate catabolic process	10	147	1.89e-05	Aldoa,Cnp,Gapdh,Gpd1,Ogdh,Pfkp,Pgam1,Pkm,Tpi1,Vcp
GO:0010591	regulation of lamellipodium assembly	6	33	1.97e-05	Actr3,Capzb,Cfl1,Fscn1,Nckap1,Rac1
GO:0031346	positive regulation of cell projection organization	16	435	2.53e-05	Abl2,Actr3,Ap2a1,Cfl1,Dpysl3,Eef1a1,Fscn1,Itpka,L1cam,Map2k1,Nckap1,Rac1,Rims1,Sept7,Syt1,Ube2v2
GO:0050821	protein stabilization	10	157	3.06e-05	Atp1b1,Atp1b2,Atp1b3,Cct3,Cct7,Gapdh,Nckap1,Pfn2,Rpl23,Tcp1
GO:0006996	organelle organization	47	2805	3.39e-05	Abl2,Actr3,Afg3l2,Ap3d1,Atl3,Atp2a2,Cap2,Capzb,Cfl1,Cltc,Cnp,Cox7a2l,Ctbp1,Ctsd,Dnajc11,Dpysl3,Dstn,Fscn1,Gapdh,Hspa8,Itpka,Kpnb1,Map2k1,Map7d1,Nckap1,Ndufab1,Ndufb10,Ndufb8,Ndufs7,Ndufs8,Pfn2,Ppp2r1a,Rab3a,Rab7,Rac1,Rps17,Ruvbl2,Samm50,Sept4,Sept7,Slc25a5,Smarcc2,Stoml2,Syt1,Tardbp,Tuba4a,Tubb3
GO:0031647	regulation of protein stability	12	245	3.56e-05	Atp1b1,Atp1b2,Atp1b3,Cct3,Cct7,Gapdh,Hspa8,Isoc2a,Nckap1,Pfn2,Rpl23,Tcp1
GO:0043648	dicarboxylic acid metabolic process	8	92	4.12e-05	Adssl1,Aldh5a1,Cs,Dld,Got2,Mdh2,Ogdh,Sdha
GO:0072330	monocarboxylic acid biosynthetic process	10	164	4.27e-05	Abat,Aldoa,Gad1,Gapdh,Ndufab1,Ogdh,Pfkp,Pgam1,Pkm,Tpi1
GO:0010592	positive regulation of lamellipodium assembly	5	21	4.83e-05	Actr3,Cfl1,Fscn1,Nckap1,Rac1
GO:0036376	sodium ion export across plasma membrane	4	8	4.94e-05	Atp1a3,Atp1b1,Atp1b2,Atp1b3
GO:1901575	organic substance catabolic process	28	1276	5.98e-05	Acaa1a,Adh5,Aldh5a1,Aldoa,Blmh,Cnp,Ctsb,Ctsd,Ddah1,Echs1,Etfa,Gapdh,Got2,Gpd1,Hspa8,Ogdh,Pcbp2,Pfkp,Pgam1,Pgm2,Pkm,Pygb,Qdpr,Rab7,Tpi1,Uba1,Uchl1,Vcp
GO:0071704	organic substance metabolic process	94	7733	6.68e-05	Abat,Abl2,Acaa1a,Adam22,Adh5,Adi1,Adk,Adssl1,Afg3l2,Aldh5a1,Aldoa,Ap2b1,Armt1,Atp1b1,Atp5o,Atp6v1b2,Blmh,Camkv,Cand1,Celf4,Cfl1,Cltc,Cnp,Cops8,Cs,Ctbp1,Ctsb,Ctsd,Ddah1,Dlat,Dld,Dpp6,Echs1,Eef1a1,Eef1a2,Eef1g,Eef2,Efr3b,Eif3f,Etfa,Gad1,Gapdh,Gbas,Glrx5,Gmps,Got2,Gpd1,Gstm5,Hspa8,Itpka,Kcnab2,Map2k1,Marc2,Mdh2,Ndufab1,Ndufb8,Ndufs2,Ndufv1,Ogdh,P4hb,Pcbp2,Pdha1,Pebp1,Pfkp,Pgam1,Pgm2,Pkm,Ppp2r1a,Ppp3…
GO:0048518	positive regulation of biological process	72	5340	6.98e-05	Abat,Abl2,Actr3,Adk,Aldoa,Ap2a1,Ap2b1,Ap3d1,Atl3,Atp1b1,Atp1b2,Atp1b3,Cadm1,Cand1,Cct3,Cct7,Celf4,Cfl1,Cops8,Crip2,Ctbp1,Ddah1,Dpp6,Dpysl3,Dstn,Eef1a1,Eef1a2,Eef2,Fscn1,Gapdh,Gbas,Gnai2,Gpd1,Hp,Hspa8,Hsph1,Itpka,L1cam,Mag,Map2k1,Mapre3,Nckap1,P4hb,Pebp1,Pfn2,Ppp2r1a,Ppp3r1,Prdx5,Prkcg,Rab3a,Rab3b,Rab7,Rac1,Rap2b,Rhob,Rims1,Rpl23,Rplp1,Ruvbl2,Sept4,Sept5,Sept7,Slc25a5,Smarcc2,Stoml2,Syt1,Tardbp,Tc…
GO:0009060	aerobic respiration	7	71	8.09e-05	Cs,Dlat,Mdh2,Ogdh,Pdha1,Sdha,Uqcrc1
GO:0120032	regulation of plasma membrane bounded cell projection assembly	10	178	8.09e-05	Actr3,Capzb,Cfl1,Dpysl3,Fscn1,Nckap1,Pfn2,Rac1,Sept7,Vdac3
GO:0010975	regulation of neuron projection development	17	547	9.09e-05	Abl2,Actr3,Ap2a1,Cfl1,Dpysl3,Eef1a1,Itpka,L1cam,Lzts3,Mag,Map2k1,Ntm,Rac1,Rap1gap2,Rims1,Syt1,Ube2v2
GO:0030007	cellular potassium ion homeostasis	4	10	9.19e-05	Atp1a3,Atp1b1,Atp1b2,Atp1b3
GO:0010638	positive regulation of organelle organization	17	554	0.00011	Actr3,Atl3,Cct3,Cct7,Cfl1,Ctbp1,Dstn,Fscn1,Nckap1,Pebp1,Pfn2,Rac1,Ruvbl2,Sept7,Stoml2,Syt1,Tcp1
GO:0050789	regulation of biological process	109	9594	0.00011	Abat,Abl2,Actr3,Adk,Afg3l2,Aldoa,Ap2a1,Ap2a2,Ap2b1,Ap3d1,Armt1,Atl3,Atp1a3,Atp1b1,Atp1b2,Atp1b3,Atp2a2,Cadm1,Camkv,Cand1,Cap2,Capzb,Cct3,Cct7,Celf4,Cfl1,Cisd1,Ckmt1,Cltc,Cops8,Cox7a2l,Crip2,Ctbp1,Ctsb,Ddah1,Dld,Dpp6,Dpysl3,Dstn,Eef1a1,Eef1a2,Eef2,Fscn1,Gapdh,Gbas,Gdi2,Glrx5,Gnai2,Gnao1,Gnaz,Gpd1,Hp,Hspa8,Hsph1,Itpka,Kcnab2,Kpnb1,L1cam,Lxn,Lzts3,Mag,Map2k1,Mapre3,Ncald,Ncdn,Nckap1,Ntm,Orm1,P4hb,Pc…
GO:1901605	alpha-amino acid metabolic process	10	186	0.00011	Adi1,Adssl1,Aldh5a1,Blmh,Ddah1,Gmps,Got2,P4hb,Psat1,Qdpr
GO:0006414	translational elongation	5	27	0.00012	Eef1a1,Eef1a2,Eef1g,Eef2,Rplp1
GO:0007005	mitochondrion organization	14	388	0.00012	Afg3l2,Cnp,Cox7a2l,Dnajc11,Ndufab1,Ndufb10,Ndufb8,Ndufs7,Ndufs8,Rab3a,Samm50,Sept4,Slc25a5,Stoml2
GO:0010976	positive regulation of neuron projection development	13	333	0.00012	Abl2,Actr3,Ap2a1,Cfl1,Dpysl3,Eef1a1,Itpka,L1cam,Map2k1,Rac1,Rims1,Syt1,Ube2v2
GO:0046907	intracellular transport	24	1032	0.00012	Ap2a1,Ap2a2,Ap2b1,Ap2s1,Ap3d1,Atp2a2,Atp5o,Cfl1,Cltc,Cplx1,Hspa8,Kpnb1,Map2k1,Ppp3r1,Rab3a,Rab7,Rhob,Rims1,Samm50,Stoml2,Syt1,Uchl1,Vcp,Ywhaq
GO:0044238	primary metabolic process	90	7426	0.00014	Abat,Abl2,Acaa1a,Adam22,Adh5,Adi1,Adk,Adssl1,Afg3l2,Aldh5a1,Aldoa,Armt1,Atp1b1,Atp5o,Atp6v1b2,Blmh,Camkv,Cand1,Celf4,Cfl1,Cnp,Cops8,Cs,Ctbp1,Ctsb,Ctsd,Ddah1,Dlat,Dld,Dpp6,Echs1,Eef1a1,Eef1a2,Eef1g,Eef2,Efr3b,Eif3f,Etfa,Gad1,Gapdh,Gbas,Glrx5,Gmps,Got2,Gpd1,Hspa8,Itpka,Kcnab2,Map2k1,Mdh2,Ndufab1,Ndufb8,Ndufs2,Ndufv1,Ogdh,P4hb,Pcbp2,Pdha1,Pebp1,Pfkp,Pgam1,Pgm2,Pkm,Ppp2r1a,Ppp3r1,Prdx5,Prkcg,Prps1,Ps…
GO:0050794	regulation of cellular process	104	9045	0.00014	Abat,Abl2,Actr3,Adk,Aldoa,Ap2a1,Ap2a2,Ap2b1,Ap3d1,Armt1,Atl3,Atp1a3,Atp1b1,Atp1b2,Atp1b3,Atp2a2,Cadm1,Camkv,Cand1,Cap2,Capzb,Cct3,Cct7,Celf4,Cfl1,Cisd1,Ckmt1,Cltc,Cops8,Cox7a2l,Crip2,Ctbp1,Ctsb,Ddah1,Dld,Dpp6,Dpysl3,Dstn,Eef1a1,Eef1a2,Eef2,Fscn1,Gapdh,Gdi2,Glrx5,Gnai2,Gnao1,Gnaz,Gpd1,Hp,Hspa8,Hsph1,Itpka,Kcnab2,Kpnb1,L1cam,Lxn,Lzts3,Mag,Map2k1,Mapre3,Ncald,Ncdn,Nckap1,Ntm,P4hb,Pebp1,Pfn2,Pgam1,Pp…
GO:0006807	nitrogen compound metabolic process	86	6983	0.00015	Abat,Abl2,Adam22,Adh5,Adi1,Adk,Adssl1,Afg3l2,Aldh5a1,Aldoa,Armt1,Atp1b1,Atp5o,Atp6v1b2,Blmh,Camkv,Cand1,Celf4,Cfl1,Cnp,Cops8,Cs,Ctbp1,Ctsb,Ctsd,Ddah1,Dlat,Dld,Dpp6,Eef1a1,Eef1a2,Eef1g,Eef2,Eif3f,Gad1,Gapdh,Gbas,Glrx5,Gmps,Got2,Gpd1,Gstm5,Hspa8,Itpka,Kcnab2,Map2k1,Marc2,Mdh2,Ndufab1,Ndufb8,Ndufs2,Ndufv1,Ogdh,P4hb,Pcbp2,Pdha1,Pebp1,Pfkp,Pgam1,Pkm,Ppp2r1a,Ppp3r1,Prdx5,Prkcg,Prps1,Psat1,Qdpr,Rab3b,Ra…
GO:0042775	mitochondrial ATP synthesis coupled electron transport	6	51	0.00015	Dld,Ndufb8,Ndufs2,Ndufv1,Sdha,Uqcrc1
GO:0033043	regulation of organelle organization	25	1127	0.00016	Actr3,Atl3,Capzb,Cct3,Cct7,Cfl1,Cltc,Ctbp1,Dstn,Fscn1,Hsph1,Map2k1,Nckap1,Pebp1,Pfn2,Rab3a,Rac1,Ruvbl2,Sept7,Slc25a5,Stoml2,Syt1,Tcp1,Vat1,Vdac3
GO:0001505	regulation of neurotransmitter levels	12	298	0.0002	Abat,Aldh5a1,Atp2a2,Cplx1,Ddah1,Gad1,Pebp1,Pfn2,Rab3a,Rab3b,Rims1,Syt1
GO:1903288	positive regulation of potassium ion import across plasma membrane	3	3	0.00021	Atp1b1,Atp1b2,Atp1b3
GO:0051234	establishment of localization	50	3317	0.00022	Abl2,Actr3,Afg3l2,Ap2a1,Ap2a2,Ap2b1,Ap2s1,Ap3d1,Atp1a3,Atp1b1,Atp1b2,Atp1b3,Atp2a2,Atp5o,Atp6v1b2,Atp6v1f,Cct3,Cct7,Cfl1,Cltc,Cnp,Cox7a2l,Cplx1,Gdi2,Got2,Hspa8,Kbp,Kcnab2,Kpnb1,Map2k1,Ppp3r1,Rab3a,Rab3b,Rab7,Rac1,Rhob,Rims1,Ruvbl2,Samm50,Selenbp1,Slc25a3,Slc25a5,Stoml2,Syt1,Tcp1,Uchl1,Vcp,Vdac2,Vdac3,Ywhaq
GO:0032879	regulation of localization	42	2579	0.00023	Abat,Abl2,Actr3,Aldoa,Ap2a1,Ap2b1,Ap3d1,Atp1b1,Atp1b2,Atp1b3,Atp2a2,Cadm1,Cct3,Cct7,Cfl1,Cltc,Dpp6,Dpysl3,Gapdh,Gbas,Gnai2,Gnao1,Hspa8,Hsph1,Kcnab2,Map2k1,Nckap1,Pfn2,Prkcg,Rab3a,Rab3b,Rab7,Rac1,Rap2b,Rhob,Rims1,Sept5,Slc25a5,Syt1,Tcp1,Wnk2,Ywhaq
GO:0051641	cellular localization	33	1792	0.00023	Abl2,Actr3,Anks1b,Ap2a1,Ap2a2,Ap2b1,Ap2s1,Ap3d1,Atp1b1,Atp1b3,Atp2a2,Atp5o,Cfl1,Cltc,Cplx1,Dpp6,Efr3b,Hspa8,Kpnb1,Map2k1,Ppp3r1,Rab3a,Rab7,Rac1,Rhob,Rims1,Ruvbl2,Samm50,Stoml2,Syt1,Uchl1,Vcp,Ywhaq
GO:0006883	cellular sodium ion homeostasis	4	14	0.00024	Atp1a3,Atp1b1,Atp1b2,Atp1b3
GO:0010248	establishment or maintenance of transmembrane electrochemical gradient	4	14	0.00024	Atp1a3,Atp1b1,Atp1b2,Atp1b3
GO:0022008	neurogenesis	31	1650	0.00029	Abl2,Actr3,Adam22,Afg3l2,Ap2a1,Capzb,Cfl1,Cnp,Dpysl3,Eef1a1,Eef2,Gnao1,Itpka,L1cam,Lzts3,Mag,Map2k1,Ncdn,Ntm,Ogdh,Ppp3r1,Rab3a,Rac1,Rap1gap2,Rims1,Sept7,Smarcc2,Syt1,Tubb3,Ube2v2,Uchl1
GO:0050804	modulation of chemical synaptic transmission	13	367	0.00029	Abat,Atp2a2,Celf4,Cfl1,Gnai2,Itpka,Ncdn,Pfn2,Rab3a,Rab3b,Rac1,Rims1,Syt1
GO:0006458	'de novo' protein folding	5	35	0.00034	Cct3,Cct7,Hspa8,Hsph1,Tcp1
GO:0006810	transport	48	3187	0.00035	Abl2,Afg3l2,Ap2a1,Ap2a2,Ap2b1,Ap2s1,Ap3d1,Atp1a3,Atp1b1,Atp1b2,Atp1b3,Atp2a2,Atp5o,Atp6v1b2,Atp6v1f,Cct3,Cct7,Cfl1,Cltc,Cnp,Cox7a2l,Cplx1,Gdi2,Got2,Hspa8,Kbp,Kcnab2,Kpnb1,Map2k1,Ppp3r1,Rab3a,Rab3b,Rab7,Rac1,Rhob,Rims1,Samm50,Selenbp1,Slc25a3,Slc25a5,Stoml2,Syt1,Tcp1,Uchl1,Vcp,Vdac2,Vdac3,Ywhaq
GO:1903278	positive regulation of sodium ion export across plasma membrane	3	4	0.00035	Atp1b1,Atp1b2,Atp1b3
GO:0007339	binding of sperm to zona pellucida	5	36	0.00037	Aldoa,Cct3,Cct7,Tcp1,Vdac2
GO:0044403	symbiont process	10	220	0.00037	Cfl1,Ctsb,Eif3f,Gapdh,Hspa8,Pcbp2,Rab7,Tardbp,Tcp1,Vcp
GO:0051050	positive regulation of transport	22	987	0.00048	Abat,Abl2,Actr3,Ap2a1,Ap2b1,Atp1b1,Atp1b2,Atp1b3,Cadm1,Cfl1,Dpp6,Gapdh,Gbas,Gnai2,Hspa8,Rab3a,Rab3b,Rab7,Rims1,Sept5,Syt1,Wnk2
GO:0007010	cytoskeleton organization	21	916	0.00049	Abl2,Actr3,Cap2,Capzb,Cfl1,Cltc,Cnp,Dpysl3,Dstn,Fscn1,Gapdh,Itpka,Kpnb1,Map7d1,Nckap1,Pfn2,Ppp2r1a,Rac1,Sept7,Tuba4a,Tubb3
GO:0032501	multicellular organismal process	74	5888	0.00049	Abat,Abl2,Actr3,Adam22,Adh5,Afg3l2,Aldh5a1,Aldoa,Ap2a1,Ap2b1,Atp1a3,Atp1b1,Atp2a2,Cadm1,Capzb,Cfl1,Cnp,Crip2,Ctsb,Ddah1,Dlat,Dld,Dpp6,Dpysl3,Eef1a1,Eef2,Gapdh,Glrx5,Gnai2,Gnao1,Got2,Hp,Itpka,Kbp,Kcnab2,L1cam,Lxn,Lzts3,Mag,Map2k1,Ncald,Ncdn,Nckap1,Ntm,Ogdh,Pebp1,Pkm,Ppp2r1a,Ppp3r1,Prdx5,Prkcg,Prps1,Qdpr,Rab3a,Rab7,Rac1,Rap1gap2,Rap2b,Rhob,Rims1,Sdha,Sept4,Sept7,Serpinb6a,Smarcc2,Stoml2,Syt1,Tpi1,T…
GO:0044282	small molecule catabolic process	11	279	0.00049	Acaa1a,Adh5,Aldh5a1,Blmh,Ddah1,Echs1,Etfa,Got2,Pgm2,Qdpr,Tpi1
GO:0009448	gamma-aminobutyric acid metabolic process	3	5	0.00052	Abat,Aldh5a1,Gad1
GO:0017157	regulation of exocytosis	9	184	0.00054	Atp2a2,Gnai2,Pfn2,Rab3a,Rab3b,Rab7,Rims1,Sept5,Syt1
GO:0043603	cellular amide metabolic process	17	644	0.00054	Aldh5a1,Cs,Dlat,Dld,Eef1a1,Eef1a2,Eef1g,Eef2,Eif3f,Gstm5,Hspa8,Ogdh,Pdha1,Rpl23,Rplp1,Rps17,Vars
GO:0050790	regulation of catalytic activity	35	2057	0.00054	Abl2,Atp1b1,Atp1b2,Atp1b3,Cand1,Cap2,Cops8,Ctsb,Eef1a2,Gapdh,Gbas,Gdi2,Gnai2,Gnao1,Hp,Hspa8,Hsph1,Lxn,Map2k1,Mapre3,Pebp1,Pfn2,Ppp2r1a,Prdx5,Rab3a,Rac1,Rap1gap2,Rap2b,Rnh1,Rpl23,Rplp1,Serpinb6a,Tcp1,Uchl1,Vcp
GO:0120034	positive regulation of plasma membrane bounded cell projection assembly	7	103	0.00058	Actr3,Cfl1,Dpysl3,Fscn1,Nckap1,Rac1,Sept7
GO:1902307	positive regulation of sodium ion transmembrane transport	4	19	0.00058	Atp1b1,Atp1b2,Atp1b3,Wnk2
GO:0032981	mitochondrial respiratory chain complex I assembly	5	41	0.00061	Ndufab1,Ndufb10,Ndufb8,Ndufs7,Ndufs8
GO:0008104	protein localization	31	1733	0.00062	Abl2,Anks1b,Ap2a1,Ap2a2,Ap2b1,Ap2s1,Ap3d1,Atp1b1,Atp1b3,Cfl1,Cltc,Cplx1,Dpp6,Efr3b,Gdi2,Hspa8,Kpnb1,Nckap1,Ppp3r1,Rab3a,Rab3b,Rab7,Rac1,Rhob,Rims1,Ruvbl2,Samm50,Selenbp1,Tcp1,Vcp,Ywhaq
GO:0017158	regulation of calcium ion-dependent exocytosis	6	70	0.00062	Atp2a2,Gnai2,Pfn2,Rab3a,Rims1,Syt1
GO:0044267	cellular protein metabolic process	45	2995	0.00064	Abl2,Adh5,Afg3l2,Armt1,Camkv,Cand1,Cfl1,Cops8,Ctbp1,Ctsb,Ddah1,Dld,Eef1a1,Eef1a2,Eef1g,Eef2,Eif3f,Gapdh,Glrx5,Hspa8,Itpka,Map2k1,Mdh2,Ndufab1,Ogdh,P4hb,Pcbp2,Pebp1,Ppp2r1a,Ppp3r1,Prkcg,Rab3b,Rab7,Rpl23,Rplp1,Rps17,Ruvbl2,Stoml2,Uba1,Ube2m,Ube2v2,Uchl1,Vars,Vcp,Wnk2
GO:0006734	NADH metabolic process	4	20	0.00066	Gpd1,Mdh2,Ogdh,Vcp
GO:0051649	establishment of localization in cell	25	1260	0.00076	Actr3,Ap2a1,Ap2a2,Ap2b1,Ap2s1,Ap3d1,Atp2a2,Atp5o,Cfl1,Cltc,Cplx1,Hspa8,Kpnb1,Map2k1,Ppp3r1,Rab3a,Rab7,Rhob,Rims1,Samm50,Stoml2,Syt1,Uchl1,Vcp,Ywhaq
GO:0033108	mitochondrial respiratory chain complex assembly	6	74	0.0008	Ndufab1,Ndufb10,Ndufb8,Ndufs7,Ndufs8,Samm50
GO:0006457	protein folding	8	153	0.00087	Cct3,Cct7,Hspa4l,Hspa8,Hsph1,P4hb,Tcp1,Vbp1
GO:0051259	protein complex oligomerization	15	542	0.00087	Aldh5a1,Aldoa,Atl3,Dpysl3,Eef1a1,Kcnab2,Lzts3,Map2k1,Pfkp,Pkm,Sept4,Sept7,Stoml2,Syt1,Vcp
GO:0006167	AMP biosynthetic process	3	7	0.00098	Adk,Adssl1,Prps1
GO:0017014	protein nitrosylation	3	7	0.00098	Adh5,Ddah1,Gapdh
GO:0006886	intracellular protein transport	16	616	0.001	Ap2a1,Ap2a2,Ap2b1,Ap2s1,Ap3d1,Cfl1,Cltc,Hspa8,Kpnb1,Ppp3r1,Rab7,Rhob,Rims1,Samm50,Vcp,Ywhaq
GO:0048699	generation of neurons	28	1538	0.0011	Abl2,Actr3,Afg3l2,Ap2a1,Capzb,Cfl1,Cnp,Dpysl3,Eef1a1,Gnao1,Itpka,L1cam,Lzts3,Mag,Map2k1,Ncdn,Ntm,Ogdh,Rab3a,Rac1,Rap1gap2,Rims1,Sept7,Smarcc2,Syt1,Tubb3,Ube2v2,Uchl1
GO:0060627	regulation of vesicle-mediated transport	14	492	0.0011	Ap2a1,Ap2b1,Atp2a2,Gnai2,Hspa8,Map2k1,Pfn2,Prkcg,Rab3a,Rab3b,Rab7,Rims1,Sept5,Syt1
GO:0032781	positive regulation of ATPase activity	5	49	0.0012	Atp1b1,Atp1b2,Atp1b3,Pfn2,Rab3a
GO:0006790	sulfur compound metabolic process	10	262	0.0013	Adi1,Aldh5a1,Blmh,Cs,Dlat,Dld,Eef1g,Gstm5,Ogdh,Pdha1
GO:0019538	protein metabolic process	50	3580	0.0013	Abl2,Adam22,Adh5,Afg3l2,Armt1,Blmh,Camkv,Cand1,Cfl1,Cops8,Ctbp1,Ctsb,Ctsd,Ddah1,Dld,Dpp6,Eef1a1,Eef1a2,Eef1g,Eef2,Eif3f,Gapdh,Glrx5,Hspa8,Itpka,Map2k1,Mdh2,Ndufab1,Ogdh,P4hb,Pcbp2,Pebp1,Ppp2r1a,Ppp3r1,Prkcg,Rab3b,Rab7,Rpl23,Rplp1,Rps17,Ruvbl2,Stoml2,Uba1,Ube2m,Ube2v2,Uchl1,Uqcrc1,Vars,Vcp,Wnk2
GO:0061732	mitochondrial acetyl-CoA biosynthetic process from pyruvate	3	8	0.0013	Dlat,Dld,Pdha1
GO:0006094	gluconeogenesis	4	26	0.0015	Gapdh,Gpd1,Pgam1,Tpi1
GO:0008037	cell recognition	7	123	0.0015	Aldoa,Cadm1,Cct3,Cct7,L1cam,Tcp1,Vdac2
GO:0033036	macromolecule localization	33	2009	0.0015	Abl2,Anks1b,Ap2a1,Ap2a2,Ap2b1,Ap2s1,Ap3d1,Atp1b1,Atp1b3,Cfl1,Cltc,Cplx1,Dpp6,Efr3b,Gdi2,Got2,Hspa8,Kpnb1,Nckap1,Ppp3r1,Rab3a,Rab3b,Rab7,Rac1,Rhob,Rims1,Ruvbl2,Samm50,Selenbp1,Stoml2,Tcp1,Vcp,Ywhaq
GO:0034613	cellular protein localization	23	1162	0.0015	Abl2,Ap2a1,Ap2a2,Ap2b1,Ap2s1,Ap3d1,Atp1b1,Atp1b3,Cfl1,Cltc,Dpp6,Efr3b,Hspa8,Kpnb1,Ppp3r1,Rab7,Rac1,Rhob,Rims1,Ruvbl2,Samm50,Vcp,Ywhaq
GO:0051179	localization	57	4315	0.0015	Abl2,Actr3,Afg3l2,Anks1b,Ap2a1,Ap2a2,Ap2b1,Ap2s1,Ap3d1,Atp1a3,Atp1b1,Atp1b2,Atp1b3,Atp2a2,Atp5o,Atp6v1b2,Atp6v1f,Cct3,Cct7,Cfl1,Cltc,Cnp,Cox7a2l,Cplx1,Dpp6,Efr3b,Fscn1,Gdi2,Got2,Hspa8,Kbp,Kcnab2,Kpnb1,L1cam,Map2k1,Nckap1,Ogdh,Ppp3r1,Rab3a,Rab3b,Rab7,Rac1,Rhob,Rims1,Ruvbl2,Samm50,Selenbp1,Slc25a3,Slc25a5,Stoml2,Syt1,Tcp1,Uchl1,Vcp,Vdac2,Vdac3,Ywhaq
GO:0120033	negative regulation of plasma membrane bounded cell projection assembly	4	26	0.0015	Actr3,Capzb,Cfl1,Pfn2
GO:1990573	potassium ion import across plasma membrane	4	27	0.0016	Atp1a3,Atp1b1,Atp1b2,Atp1b3
GO:2000300	regulation of synaptic vesicle exocytosis	4	27	0.0016	Atp2a2,Pfn2,Rab3a,Rims1
GO:0006084	acetyl-CoA metabolic process	4	29	0.0021	Cs,Dlat,Dld,Pdha1
GO:0032502	developmental process	65	5213	0.0021	Abat,Abl2,Actr3,Adam22,Afg3l2,Aldh5a1,Ap2a1,Ap2b1,Ap3d1,Atp1a3,Atp2a2,Cadm1,Cand1,Cap2,Capzb,Cfl1,Cnp,Crip2,Ctbp1,Ctsb,Dld,Dpysl3,Eef1a1,Eef2,Fscn1,Gapdh,Glrx5,Gnao1,Got2,Hp,Itpka,Kbp,Kcnab2,L1cam,Lzts3,Mag,Map2k1,Ncdn,Nckap1,Ntm,Ogdh,Pebp1,Pkm,Ppp3r1,Prkcg,Prps1,Qdpr,Rab3a,Rac1,Rap1gap2,Rhob,Rims1,Sdha,Selenbp1,Sept4,Sept7,Serpinb6a,Smarcc2,Syt1,Tpi1,Tpt1,Tubb3,Ube2v2,Uchl1,Wdr7
GO:0048731	system development	54	4072	0.0021	Abat,Abl2,Actr3,Adam22,Afg3l2,Aldh5a1,Ap2a1,Ap2b1,Atp1a3,Cadm1,Capzb,Cfl1,Cnp,Crip2,Ctsb,Dpysl3,Eef1a1,Eef2,Glrx5,Gnao1,Got2,Hp,Itpka,Kbp,Kcnab2,L1cam,Lzts3,Mag,Map2k1,Ncdn,Nckap1,Ntm,Ogdh,Pebp1,Pkm,Ppp3r1,Prkcg,Prps1,Qdpr,Rab3a,Rac1,Rap1gap2,Rhob,Rims1,Sdha,Sept4,Sept7,Serpinb6a,Smarcc2,Syt1,Tubb3,Ube2v2,Uchl1,Wdr7
GO:0051049	regulation of transport	30	1782	0.0021	Abat,Abl2,Actr3,Ap2a1,Ap2b1,Atp1b1,Atp1b2,Atp1b3,Atp2a2,Cadm1,Cfl1,Dpp6,Gapdh,Gbas,Gnai2,Gnao1,Hspa8,Kcnab2,Map2k1,Pfn2,Prkcg,Rab3a,Rab3b,Rab7,Rims1,Sept5,Slc25a5,Syt1,Wnk2,Ywhaq
GO:0051260	protein homooligomerization	11	339	0.0021	Aldh5a1,Aldoa,Atl3,Dpysl3,Eef1a1,Lzts3,Pfkp,Pkm,Sept4,Syt1,Vcp
GO:1904851	positive regulation of establishment of protein localization to telomere	3	10	0.0021	Cct3,Cct7,Tcp1
GO:0050769	positive regulation of neurogenesis	14	531	0.0022	Abl2,Actr3,Ap2a1,Cfl1,Dpysl3,Eef1a1,Itpka,L1cam,Mag,Map2k1,Rac1,Rims1,Syt1,Ube2v2
GO:0006839	mitochondrial transport	8	181	0.0023	Afg3l2,Atp5o,Cnp,Kbp,Samm50,Slc25a3,Slc25a5,Stoml2
GO:0042391	regulation of membrane potential	12	404	0.0023	Abat,Atp1a3,Atp1b1,Atp1b2,Atp1b3,Atp2a2,Celf4,Dld,Dpp6,Rims1,Stoml2,Vcp
GO:0045184	establishment of protein localization	23	1206	0.0023	Ap2a1,Ap2a2,Ap2b1,Ap2s1,Ap3d1,Cfl1,Cltc,Cplx1,Gdi2,Hspa8,Kpnb1,Ppp3r1,Rab3a,Rab3b,Rab7,Rhob,Rims1,Ruvbl2,Samm50,Selenbp1,Tcp1,Vcp,Ywhaq
GO:0009636	response to toxic substance	13	471	0.0024	Abat,Adh5,Blmh,Cfl1,Cnp,Eef2,Gnao1,Got2,Gstm5,Hp,Pebp1,Prdx5,Rhob
GO:0015031	protein transport	22	1129	0.0024	Ap2a1,Ap2a2,Ap2b1,Ap2s1,Ap3d1,Cfl1,Cltc,Cplx1,Gdi2,Hspa8,Kpnb1,Ppp3r1,Rab3a,Rab3b,Rab7,Rhob,Rims1,Samm50,Selenbp1,Tcp1,Vcp,Ywhaq
GO:0016051	carbohydrate biosynthetic process	6	96	0.0025	Gapdh,Gpd1,Ndufab1,Pgam1,Pgm2,Tpi1
GO:0046395	carboxylic acid catabolic process	8	184	0.0025	Acaa1a,Aldh5a1,Blmh,Ddah1,Echs1,Etfa,Got2,Qdpr
GO:0061077	chaperone-mediated protein folding	5	60	0.0025	Cct3,Cct7,Hspa8,Hsph1,Tcp1
GO:0061640	cytoskeleton-dependent cytokinesis	5	60	0.0025	Actr3,Cfl1,Dctn3,Rhob,Sept7
GO:0022604	regulation of cell morphogenesis	13	478	0.0026	Actr3,Aldoa,Capzb,Cfl1,Itpka,L1cam,Lzts3,Mag,Map2k1,Rac1,Rims1,Sept7,Syt1
GO:0030036	actin cytoskeleton organization	12	412	0.0026	Abl2,Actr3,Cap2,Capzb,Cfl1,Dpysl3,Dstn,Fscn1,Itpka,Nckap1,Pfn2,Rac1
GO:0032535	regulation of cellular component size	11	351	0.0026	Actr3,Capzb,Cfl1,Dstn,L1cam,Mag,Nckap1,Pfn2,Rab3b,Rac1,Rap1gap2
GO:0043604	amide biosynthetic process	12	414	0.0026	Dlat,Dld,Eef1a1,Eef1a2,Eef1g,Eef2,Eif3f,Pdha1,Rpl23,Rplp1,Rps17,Vars
GO:0032414	positive regulation of ion transmembrane transporter activity	6	98	0.0027	Atp1b1,Atp1b2,Atp1b3,Cfl1,Gbas,Wnk2
GO:0009064	glutamine family amino acid metabolic process	5	62	0.0028	Adssl1,Aldh5a1,Ddah1,Gmps,Got2
GO:0034622	cellular protein-containing complex assembly	16	687	0.0028	Ap2b1,Celf4,Cltc,Cops8,Cox7a2l,Ndufab1,Ndufb10,Ndufb8,Ndufs7,Ndufs8,Rac1,Rims1,Rps17,Ruvbl2,Samm50,Vbp1
GO:0061024	membrane organization	14	548	0.0028	Afg3l2,Ap2b1,Ap3d1,Atp2a2,Cnp,Dnajc11,Hspa8,Rab7,Rac1,Samm50,Slc25a5,Stoml2,Syt1,Tardbp
GO:1904064	positive regulation of cation transmembrane transport	7	141	0.0028	Atp1b1,Atp1b2,Atp1b3,Cfl1,Dpp6,Gbas,Wnk2
GO:0032984	protein-containing complex disassembly	6	100	0.0029	Cfl1,Dstn,Hspa8,Rpl23,Smarcc2,Vcp
GO:1901381	positive regulation of potassium ion transmembrane transport	4	33	0.0029	Atp1b1,Atp1b2,Atp1b3,Dpp6
GO:0007015	actin filament organization	8	192	0.003	Abl2,Actr3,Cap2,Cfl1,Dpysl3,Dstn,Fscn1,Rac1
GO:0008652	cellular amino acid biosynthetic process	5	64	0.0031	Abat,Adi1,Gad1,Got2,Psat1
GO:0031345	negative regulation of cell projection organization	8	193	0.0031	Actr3,Capzb,Cfl1,Dpysl3,Mag,Ntm,Pfn2,Rap1gap2
GO:1903578	regulation of ATP metabolic process	5	66	0.0035	Cox7a2l,Gpd1,Map2k1,Pgam1,Vcp
GO:0044089	positive regulation of cellular component biogenesis	13	501	0.0038	Actr3,Cand1,Cfl1,Dpysl3,Fscn1,Nckap1,Pfn2,Rab7,Rac1,Rims1,Sept7,Ube2v2,Vcp
GO:0006107	oxaloacetate metabolic process	3	14	0.0039	Cs,Got2,Mdh2
GO:0019439	aromatic compound catabolic process	10	312	0.0039	Aldoa,Cnp,Gapdh,Ogdh,Pfkp,Pgam1,Pkm,Qdpr,Tpi1,Vcp
GO:0042407	cristae formation	3	14	0.0039	Afg3l2,Dnajc11,Samm50
GO:0046033	AMP metabolic process	3	14	0.0039	Adk,Adssl1,Prps1
GO:0072594	establishment of protein localization to organelle	9	255	0.0039	Ap2b1,Ap3d1,Cfl1,Hspa8,Kpnb1,Ppp3r1,Rab7,Ruvbl2,Samm50
GO:0006518	peptide metabolic process	12	440	0.004	Aldh5a1,Eef1a1,Eef1a2,Eef1g,Eef2,Eif3f,Gstm5,Hspa8,Rpl23,Rplp1,Rps17,Vars
GO:0014823	response to activity	5	69	0.004	Adssl1,Cfl1,Got2,Pebp1,Uqcrc1
GO:0051588	regulation of neurotransmitter transport	6	108	0.004	Abat,Atp2a2,Pfn2,Rab3a,Rab3b,Rims1
GO:0006979	response to oxidative stress	11	377	0.0041	Atp2a2,Cfl1,Eef2,Gnao1,Hp,Map2k1,Ndufs2,Ndufs8,Pebp1,Prdx5,Rhob
GO:0008064	regulation of actin polymerization or depolymerization	7	154	0.0041	Actr3,Capzb,Cfl1,Dstn,Nckap1,Pfn2,Rac1
GO:0086009	membrane repolarization	3	15	0.0045	Atp1b1,Atp1b2,Atp1b3
GO:0098657	import into cell	13	516	0.0046	Abl2,Ap2a1,Ap2a2,Ap2b1,Ap2s1,Atp1a3,Atp1b1,Atp1b2,Atp1b3,Cltc,Rab7,Rac1,Syt1
GO:0106027	neuron projection organization	4	40	0.005	Abl2,Atp1a3,Itpka,Sept7
GO:0010941	regulation of cell death	27	1640	0.0051	Abl2,Ap2b1,Ckmt1,Ctsb,Eef1a1,Eef1a2,Gapdh,Gnai2,Hp,Hspa8,Hsph1,Mag,Map2k1,P4hb,Ppp2r1a,Prdx5,Prkcg,Rhob,Sept4,Slc25a5,Tardbp,Tcp1,Tpt1,Ube2m,Ube2v2,Vcp,Vdac2
GO:1901379	regulation of potassium ion transmembrane transport	5	74	0.0052	Atp1b1,Atp1b2,Atp1b3,Dpp6,Kcnab2
GO:0007017	microtubule-based process	14	595	0.0053	Actr3,Ap3d1,Cltc,Cnp,Dctn3,Gapdh,Kpnb1,Map2k1,Map7d1,Ppp2r1a,Tuba4a,Tubb3,Uchl1,Vbp1
GO:0048869	cellular developmental process	47	3545	0.0053	Abl2,Actr3,Adam22,Afg3l2,Ap2a1,Ap3d1,Atp2a2,Cadm1,Cand1,Cap2,Capzb,Cfl1,Cnp,Ctbp1,Ctsb,Dld,Dpysl3,Eef1a1,Eef2,Gnao1,Itpka,Kbp,Kcnab2,L1cam,Lzts3,Mag,Map2k1,Ncdn,Ntm,Ogdh,Pebp1,Ppp3r1,Rab3a,Rac1,Rap1gap2,Rhob,Rims1,Selenbp1,Sept4,Sept7,Smarcc2,Syt1,Tpt1,Tubb3,Ube2v2,Uchl1,Wdr7
GO:0006637	acyl-CoA metabolic process	5	76	0.0057	Cs,Dlat,Dld,Ogdh,Pdha1
GO:0042063	gliogenesis	8	217	0.0057	Abl2,Actr3,Adam22,Cnp,Eef2,Mag,Map2k1,Ppp3r1
GO:0030154	cell differentiation	46	3462	0.0058	Abl2,Actr3,Adam22,Afg3l2,Ap2a1,Ap3d1,Atp2a2,Cadm1,Cand1,Capzb,Cfl1,Cnp,Ctbp1,Ctsb,Dld,Dpysl3,Eef1a1,Eef2,Gnao1,Itpka,Kbp,Kcnab2,L1cam,Lzts3,Mag,Map2k1,Ncdn,Ntm,Ogdh,Pebp1,Ppp3r1,Rab3a,Rac1,Rap1gap2,Rhob,Rims1,Selenbp1,Sept4,Sept7,Smarcc2,Syt1,Tpt1,Tubb3,Ube2v2,Uchl1,Wdr7
GO:0048856	anatomical structure development	60	4912	0.0058	Abat,Abl2,Actr3,Adam22,Afg3l2,Aldh5a1,Ap2a1,Ap2b1,Atp1a3,Atp2a2,Cadm1,Cap2,Capzb,Cfl1,Cnp,Crip2,Ctsb,Dld,Dpysl3,Eef1a1,Eef2,Fscn1,Gapdh,Glrx5,Gnao1,Got2,Hp,Itpka,Kbp,Kcnab2,L1cam,Lzts3,Mag,Map2k1,Ncdn,Nckap1,Ntm,Ogdh,Pebp1,Pkm,Ppp3r1,Prkcg,Prps1,Qdpr,Rab3a,Rac1,Rap1gap2,Rhob,Rims1,Sdha,Sept4,Sept7,Serpinb6a,Smarcc2,Syt1,Tpi1,Tubb3,Ube2v2,Uchl1,Wdr7
GO:0007275	multicellular organism development	57	4603	0.006	Abat,Abl2,Actr3,Adam22,Afg3l2,Aldh5a1,Ap2a1,Ap2b1,Atp1a3,Cadm1,Capzb,Cfl1,Cnp,Crip2,Ctsb,Dld,Dpysl3,Eef1a1,Eef2,Gapdh,Glrx5,Gnao1,Got2,Hp,Itpka,Kbp,Kcnab2,L1cam,Lzts3,Mag,Map2k1,Ncdn,Nckap1,Ntm,Ogdh,Pebp1,Pkm,Ppp3r1,Prkcg,Prps1,Qdpr,Rab3a,Rac1,Rap1gap2,Rhob,Rims1,Sdha,Sept4,Sept7,Serpinb6a,Smarcc2,Syt1,Tpi1,Tubb3,Ube2v2,Uchl1,Wdr7
GO:0008154	actin polymerization or depolymerization	4	43	0.006	Cap2,Cfl1,Dstn,Rac1
GO:0051704	multi-organism process	29	1840	0.006	Abat,Abl2,Adh5,Aldoa,Atp2a2,Cadm1,Cct3,Cct7,Cfl1,Cnp,Ctsb,Dld,Eif3f,Gad1,Gapdh,Got2,Hp,Hspa8,Pcbp2,Pebp1,Ppp2r1a,Rab7,Sept4,Sept7,Tardbp,Tcp1,Tpt1,Vcp,Vdac2
GO:0010001	glial cell differentiation	7	169	0.0063	Abl2,Actr3,Adam22,Cnp,Mag,Map2k1,Ppp3r1
GO:0065009	regulation of molecular function	42	3081	0.0063	Abl2,Actr3,Atp1b1,Atp1b2,Atp1b3,Cand1,Cap2,Cfl1,Ckmt1,Cops8,Ctsb,Dpp6,Eef1a2,Gapdh,Gbas,Gdi2,Gnai2,Gnao1,Hp,Hspa8,Hsph1,Kcnab2,Lxn,Map2k1,Mapre3,Pebp1,Pfn2,Ppp2r1a,Prdx5,Rab3a,Rac1,Rap1gap2,Rap2b,Rnh1,Rpl23,Rplp1,Ruvbl2,Serpinb6a,Tcp1,Uchl1,Vcp,Wnk2
GO:1901361	organic cyclic compound catabolic process	10	339	0.0063	Aldoa,Cnp,Gapdh,Ogdh,Pfkp,Pgam1,Pkm,Qdpr,Tpi1,Vcp
GO:0008333	endosome to lysosome transport	4	44	0.0064	Ap3d1,Rab7,Rhob,Vcp
GO:0061001	regulation of dendritic spine morphogenesis	4	44	0.0064	Actr3,Cfl1,Itpka,Lzts3
GO:0006103	2-oxoglutarate metabolic process	3	18	0.0065	Dld,Got2,Ogdh
GO:0060359	response to ammonium ion	6	122	0.0065	Abat,Gapdh,Gnai2,Gnao1,Got2,Prkcg
GO:0007041	lysosomal transport	5	80	0.0066	Ap3d1,Hspa8,Rab7,Rhob,Vcp
GO:0009449	gamma-aminobutyric acid biosynthetic process	2	3	0.0066	Abat,Gad1
GO:1900126	negative regulation of hyaluronan biosynthetic process	2	3	0.0066	Ap2a1,Cltc
GO:1901606	alpha-amino acid catabolic process	5	80	0.0066	Aldh5a1,Blmh,Ddah1,Got2,Qdpr
GO:0031334	positive regulation of protein complex assembly	8	226	0.0069	Actr3,Cand1,Fscn1,Nckap1,Pfn2,Rac1,Rims1,Vcp
GO:0043254	regulation of protein complex assembly	11	409	0.0069	Actr3,Cand1,Capzb,Cfl1,Fscn1,Nckap1,Pfn2,Rac1,Rims1,Vcp,Vdac2
GO:0060998	regulation of dendritic spine development	5	82	0.0073	Actr3,Cfl1,Itpka,Lzts3,Rac1
GO:0072583	clathrin-dependent endocytosis	3	19	0.0073	Ap2a1,Ap2a2,Cltc
GO:2001057	reactive nitrogen species metabolic process	3	19	0.0073	Ddah1,Marc2,Prdx5
GO:2001169	regulation of ATP biosynthetic process	4	46	0.0073	Gpd1,Map2k1,Pgam1,Vcp
GO:0007626	locomotory behavior	8	230	0.0075	Abat,Abl2,Adam22,Atp1a3,Cnp,Gad1,Gnao1,Uchl1
GO:0030030	cell projection organization	19	1020	0.0083	Abl2,Actr3,Afg3l2,Atp1a3,Capzb,Cfl1,Cnp,Fscn1,Gnao1,Itpka,L1cam,Map2k1,Ncdn,Nckap1,Rab3a,Rac1,Sept7,Tubb3,Uchl1
GO:0043270	positive regulation of ion transport	9	293	0.0083	Abat,Atp1b1,Atp1b2,Atp1b3,Cfl1,Dpp6,Gbas,Rab3b,Wnk2
GO:0009063	cellular amino acid catabolic process	5	86	0.0086	Aldh5a1,Blmh,Ddah1,Got2,Qdpr
GO:0050808	synapse organization	7	181	0.0087	Abl2,Afg3l2,Cadm1,Itpka,L1cam,Rab3a,Sept7
GO:0051489	regulation of filopodium assembly	4	49	0.0087	Actr3,Capzb,Dpysl3,Fscn1
GO:0030043	actin filament fragmentation	2	4	0.0092	Cfl1,Dstn
GO:0042776	mitochondrial ATP synthesis coupled proton transport	2	4	0.0092	Atp5o,Stoml2
GO:0106077	histone succinylation	2	4	0.0092	Dld,Ogdh
GO:0051602	response to electrical stimulus	4	51	0.0098	Adssl1,Eef1a2,Pebp1,Rab3a
GO:0006541	glutamine metabolic process	3	22	0.0099	Adssl1,Aldh5a1,Gmps
GO:1901018	positive regulation of potassium ion transmembrane transporter activity	3	22	0.0099	Atp1b1,Atp1b2,Atp1b3
GO:0030833	regulation of actin filament polymerization	6	136	0.0101	Actr3,Capzb,Cfl1,Nckap1,Pfn2,Rac1
GO:0032271	regulation of protein polymerization	7	189	0.0105	Actr3,Capzb,Cfl1,Nckap1,Pfn2,Rac1,Vdac2
GO:0045921	positive regulation of exocytosis	5	91	0.0105	Rab3a,Rab7,Rims1,Sept5,Syt1
GO:0048489	synaptic vesicle transport	5	91	0.0105	Ap3d1,Cplx1,Rab3a,Rims1,Syt1
GO:0007006	mitochondrial membrane organization	5	92	0.0108	Afg3l2,Cnp,Dnajc11,Samm50,Slc25a5
GO:0009065	glutamine family amino acid catabolic process	3	23	0.0108	Aldh5a1,Ddah1,Got2
GO:0018198	peptidyl-cysteine modification	3	23	0.0108	Adh5,Gapdh,Rab3b
GO:0030004	cellular monovalent inorganic cation homeostasis	5	92	0.0108	Atp1a3,Atp1b1,Atp1b2,Atp1b3,Rab7
GO:0043269	regulation of ion transport	14	655	0.0108	Abat,Atp1b1,Atp1b2,Atp1b3,Cfl1,Dpp6,Gbas,Gnai2,Gnao1,Kcnab2,Rab3b,Syt1,Wnk2,Ywhaq
GO:0090066	regulation of anatomical structure size	12	508	0.0108	Actr3,Capzb,Cfl1,Dstn,L1cam,Mag,Map2k1,Nckap1,Pfn2,Rab3b,Rac1,Rap1gap2
GO:0060341	regulation of cellular localization	16	811	0.0109	Actr3,Ap2b1,Atp2a2,Cct3,Cct7,Cfl1,Cltc,Dpp6,Hsph1,Kcnab2,Map2k1,Pfn2,Rab3a,Rab3b,Rims1,Tcp1
GO:1901698	response to nitrogen compound	18	971	0.0109	Abat,Atp1a3,Atp2a2,Cfl1,Eef2,Gapdh,Gnai2,Gnao1,Got2,Gpd1,Gstm5,Pebp1,Pkm,Prkcg,Qdpr,Rpl23,Uqcrc1,Vcp
GO:0050896	response to stimulus	74	6616	0.011	Abat,Abl2,Actr3,Adh5,Adssl1,Afg3l2,Ap3d1,Armt1,Atp1a3,Atp1b1,Atp2a2,Blmh,Cadm1,Camkv,Cap2,Cfl1,Cnp,Cops8,Ctbp1,Ctsb,Dpysl3,Eef1a1,Eef1a2,Eef2,Gad1,Gapdh,Gdi2,Gnai2,Gnao1,Gnaz,Got2,Gpd1,Gstm5,Hp,Hspa4l,Hsph1,Kpnb1,L1cam,Lxn,Mag,Map2k1,Ncald,Nckap1,Ndufs2,Ndufs8,Orm1,P4hb,Pcbp2,Pebp1,Pfkp,Pkm,Ppp3r1,Prdx5,Prkcg,Qdpr,Rab3a,Rac1,Rap2b,Rhob,Rpl23,Ruvbl2,Serpinb6a,Slc25a5,Stoml2,Syt1,Tubb3,Uba1,Ube2v2,…
GO:0006950	response to stress	39	2899	0.0112	Abat,Abl2,Actr3,Adh5,Adssl1,Armt1,Atp1b1,Atp2a2,Cfl1,Dpysl3,Eef2,Gapdh,Gnao1,Gstm5,Hp,Hspa4l,Hsph1,Lxn,Map2k1,Ndufs2,Ndufs8,Orm1,P4hb,Pcbp2,Pebp1,Pkm,Prdx5,Prkcg,Rac1,Rap2b,Rhob,Ruvbl2,Serpinb6a,Stoml2,Uba1,Ube2v2,Uchl1,Vcp,Vdac3
GO:0006412	translation	9	313	0.0117	Eef1a1,Eef1a2,Eef1g,Eef2,Eif3f,Rpl23,Rplp1,Rps17,Vars
GO:0045453	bone resorption	3	24	0.0117	Ncdn,Rab7,Rac1
GO:0051305	chromosome movement towards spindle pole	2	5	0.0117	Actr3,Kpnb1
GO:2001171	positive regulation of ATP biosynthetic process	3	24	0.0117	Gpd1,Map2k1,Vcp
GO:0060999	positive regulation of dendritic spine development	4	55	0.0118	Actr3,Cfl1,Itpka,Rac1
GO:0015672	monovalent inorganic cation transport	10	380	0.0119	Atp1a3,Atp1b1,Atp1b2,Atp1b3,Atp5o,Atp6v1b2,Atp6v1f,Cox7a2l,Kcnab2,Stoml2
GO:0120036	plasma membrane bounded cell projection organization	18	982	0.0119	Abl2,Actr3,Afg3l2,Atp1a3,Capzb,Cnp,Fscn1,Gnao1,Itpka,L1cam,Map2k1,Ncdn,Nckap1,Rab3a,Rac1,Sept7,Tubb3,Uchl1
GO:0046677	response to antibiotic	9	317	0.0124	Abat,Cfl1,Eef2,Gnao1,Got2,Hp,Pebp1,Rhob,Rpl23
GO:0043467	regulation of generation of precursor metabolites and energy	5	97	0.0126	Cisd1,Cox7a2l,Gpd1,Pgam1,Vcp
GO:0060284	regulation of cell development	18	992	0.0131	Abl2,Actr3,Ap2a1,Cfl1,Dpysl3,Eef1a1,Itpka,L1cam,Lzts3,Mag,Map2k1,Ntm,Ppp2r1a,Rac1,Rap1gap2,Rims1,Syt1,Ube2v2
GO:0071705	nitrogen compound transport	23	1420	0.0131	Ap2a1,Ap2a2,Ap2b1,Ap2s1,Ap3d1,Cfl1,Cltc,Cplx1,Gdi2,Hspa8,Kpnb1,Ppp3r1,Rab3a,Rab3b,Rab7,Rhob,Rims1,Samm50,Selenbp1,Slc25a5,Tcp1,Vcp,Ywhaq
GO:0008344	adult locomotory behavior	5	99	0.0137	Abl2,Adam22,Atp1a3,Cnp,Uchl1
GO:0061462	protein localization to lysosome	3	26	0.0139	Ap3d1,Hspa8,Rab7
GO:0051656	establishment of organelle localization	9	324	0.0141	Actr3,Ap3d1,Cplx1,Kpnb1,Map2k1,Rab3a,Rims1,Syt1,Uchl1
GO:0006538	glutamate catabolic process	2	6	0.0148	Aldh5a1,Got2
GO:0007264	small GTPase mediated signal transduction	7	205	0.0148	Gdi2,Kpnb1,Nckap1,Rac1,Rap2b,Rhob,Ywhaq
GO:0018119	peptidyl-cysteine S-nitrosylation	2	6	0.0148	Adh5,Gapdh
GO:0016079	synaptic vesicle exocytosis	4	60	0.0152	Cplx1,Rab3a,Rims1,Syt1
GO:0022603	regulation of anatomical structure morphogenesis	18	1009	0.0153	Abl2,Actr3,Aldoa,Capzb,Cfl1,Ddah1,Itpka,L1cam,Lzts3,Mag,Map2k1,Rac1,Rhob,Rims1,Rnh1,Sept7,Syt1,Vat1
GO:0099504	synaptic vesicle cycle	5	103	0.0156	Ap3d1,Cplx1,Rab3a,Rims1,Syt1
GO:0051650	establishment of vesicle localization	6	154	0.0164	Ap3d1,Cplx1,Map2k1,Rab3a,Rims1,Syt1
GO:0098662	inorganic cation transmembrane transport	12	547	0.0174	Afg3l2,Atp1a3,Atp1b1,Atp1b2,Atp1b3,Atp2a2,Atp5o,Atp6v1b2,Atp6v1f,Cox7a2l,Kcnab2,Stoml2
GO:0045454	cell redox homeostasis	4	63	0.0175	Dld,Glrx5,P4hb,Prdx5
GO:0048240	sperm capacitation	3	29	0.0177	Dld,Pebp1,Sept4
GO:0098660	inorganic ion transmembrane transport	13	625	0.018	Afg3l2,Atp1a3,Atp1b1,Atp1b2,Atp1b3,Atp2a2,Atp5o,Atp6v1b2,Atp6v1f,Cox7a2l,Kcnab2,Slc25a3,Stoml2
GO:0009249	protein lipoylation	2	7	0.0181	Glrx5,Ndufab1
GO:0044087	regulation of cellular component biogenesis	16	863	0.0181	Actr3,Cand1,Capzb,Cfl1,Dpysl3,Fscn1,Nckap1,Pfn2,Rab7,Rac1,Rims1,Sept7,Ube2v2,Vcp,Vdac2,Vdac3
GO:0070995	NADPH oxidation	2	7	0.0181	Kcnab2,Prdx5
GO:0051851	modification by host of symbiont morphology or physiology	4	64	0.0182	Cfl1,Gapdh,Hspa8,Tardbp
GO:0034220	ion transmembrane transport	16	865	0.0183	Afg3l2,Atp1a3,Atp1b1,Atp1b2,Atp1b3,Atp2a2,Atp5o,Atp6v1b2,Atp6v1f,Cox7a2l,Kcnab2,Slc25a3,Slc25a5,Stoml2,Vdac2,Vdac3
GO:0032970	regulation of actin filament-based process	9	342	0.0188	Actr3,Atp2a2,Capzb,Cfl1,Dstn,Fscn1,Nckap1,Pfn2,Rac1
GO:0034641	cellular nitrogen compound metabolic process	51	4247	0.0189	Adk,Adssl1,Aldh5a1,Aldoa,Atp1b1,Atp5o,Atp6v1b2,Celf4,Cnp,Cs,Ctbp1,Ddah1,Dlat,Dld,Eef1a1,Eef1a2,Eef1g,Eef2,Eif3f,Gapdh,Gbas,Gmps,Gpd1,Gstm5,Hspa8,Kcnab2,Mdh2,Ndufb8,Ndufs2,Ndufv1,Ogdh,Pdha1,Pfkp,Pgam1,Pkm,Prdx5,Prps1,Qdpr,Rpl23,Rplp1,Rps17,Ruvbl2,Sdha,Smarcc2,Stoml2,Tardbp,Tpi1,Ube2v2,Uqcrc1,Vars,Vcp
GO:0035640	exploration behavior	3	30	0.0189	Abat,Abl2,Gad1
GO:0072666	establishment of protein localization to vacuole	3	30	0.0189	Ap3d1,Hspa8,Rab7
GO:2001242	regulation of intrinsic apoptotic signaling pathway	6	160	0.0189	Hsph1,Map2k1,P4hb,Sept4,Tpt1,Vdac2
GO:0042981	regulation of apoptotic process	23	1476	0.0193	Abl2,Ckmt1,Eef1a2,Gapdh,Gnai2,Hspa8,Hsph1,Mag,Map2k1,P4hb,Ppp2r1a,Prdx5,Prkcg,Rhob,Sept4,Slc25a5,Tardbp,Tcp1,Tpt1,Ube2m,Ube2v2,Vcp,Vdac2
GO:0031175	neuron projection development	13	637	0.02	Abl2,Afg3l2,Capzb,Cnp,Gnao1,L1cam,Map2k1,Ncdn,Rab3a,Rac1,Sept7,Tubb3,Uchl1
GO:0032212	positive regulation of telomere maintenance via telomerase	3	31	0.02	Cct3,Cct7,Tcp1
GO:1903580	positive regulation of ATP metabolic process	3	31	0.02	Gpd1,Map2k1,Vcp
GO:0048168	regulation of neuronal synaptic plasticity	4	67	0.0203	Ncdn,Rab3a,Rac1,Rims1
GO:1902600	proton transmembrane transport	5	113	0.0211	Atp5o,Atp6v1b2,Atp6v1f,Cox7a2l,Stoml2
GO:0051054	positive regulation of DNA metabolic process	7	223	0.0212	Cct3,Cct7,Prkcg,Rac1,Stoml2,Tcp1,Ube2v2
GO:0055119	relaxation of cardiac muscle	2	8	0.0212	Atp1b1,Atp2a2
GO:0097061	dendritic spine organization	3	32	0.0212	Abl2,Itpka,Sept7
GO:0097151	positive regulation of inhibitory postsynaptic potential	2	8	0.0212	Abat,Rims1
GO:0030534	adult behavior	6	167	0.022	Abat,Abl2,Adam22,Atp1a3,Cnp,Uchl1
GO:0043279	response to alkaloid	5	115	0.0222	Abat,Gnao1,Got2,Prkcg,Uqcrc1
GO:0007417	central nervous system development	16	892	0.0227	Abat,Abl2,Actr3,Aldh5a1,Atp1a3,Cfl1,Cnp,Gnao1,Mag,Map2k1,Ogdh,Pebp1,Rac1,Sept4,Smarcc2,Syt1
GO:0043278	response to morphine	3	33	0.0227	Gnao1,Got2,Prkcg
GO:0044093	positive regulation of molecular function	24	1593	0.0227	Abl2,Actr3,Atp1b1,Atp1b2,Atp1b3,Cfl1,Cops8,Eef1a2,Gbas,Gdi2,Gnai2,Gnao1,Hspa8,Hsph1,Map2k1,Mapre3,Pfn2,Rab3a,Rac1,Rap1gap2,Rplp1,Tcp1,Vcp,Wnk2
GO:0000902	cell morphogenesis	13	652	0.0231	Abl2,Afg3l2,Cadm1,Cap2,Capzb,Cnp,L1cam,Map2k1,Rab3a,Rac1,Sept7,Tubb3,Uchl1
GO:0043085	positive regulation of catalytic activity	20	1239	0.0236	Abl2,Atp1b1,Atp1b2,Atp1b3,Cops8,Eef1a2,Gdi2,Gnai2,Gnao1,Hspa8,Hsph1,Map2k1,Mapre3,Pfn2,Rab3a,Rac1,Rap1gap2,Rplp1,Tcp1,Vcp
GO:0048812	neuron projection morphogenesis	10	429	0.0236	Abl2,Afg3l2,Cnp,L1cam,Map2k1,Rab3a,Rac1,Sept7,Tubb3,Uchl1
GO:0030032	lamellipodium assembly	3	34	0.024	Capzb,Nckap1,Rac1
GO:0051491	positive regulation of filopodium assembly	3	34	0.024	Actr3,Dpysl3,Fscn1
GO:0006811	ion transport	19	1156	0.0243	Afg3l2,Ap3d1,Atp1a3,Atp1b1,Atp1b2,Atp1b3,Atp2a2,Atp5o,Atp6v1b2,Atp6v1f,Cltc,Cox7a2l,Got2,Kcnab2,Slc25a3,Slc25a5,Stoml2,Vdac2,Vdac3
GO:0022028	tangential migration from the subventricular zone to the olfactory bulb	2	9	0.0243	Ogdh,Rac1
GO:0030388	fructose 1,6-bisphosphate metabolic process	2	9	0.0243	Aldoa,Pfkp
GO:0086036	regulation of cardiac muscle cell membrane potential	2	9	0.0243	Atp1a3,Atp2a2
GO:0097062	dendritic spine maintenance	2	9	0.0243	Abl2,Itpka
GO:0042542	response to hydrogen peroxide	5	120	0.025	Cfl1,Eef2,Gnao1,Hp,Rhob
GO:0042136	neurotransmitter biosynthetic process	3	35	0.0251	Abat,Ddah1,Gad1
GO:0051261	protein depolymerization	3	35	0.0251	Cfl1,Dstn,Hspa8
GO:0010769	regulation of cell morphogenesis involved in differentiation	8	299	0.0259	Actr3,Cfl1,Itpka,L1cam,Lzts3,Mag,Map2k1,Rac1
GO:0048524	positive regulation of viral process	4	74	0.0261	Cfl1,Hspa8,P4hb,Rab7
GO:0032956	regulation of actin cytoskeleton organization	8	301	0.0268	Actr3,Capzb,Cfl1,Dstn,Fscn1,Nckap1,Pfn2,Rac1
GO:0051129	negative regulation of cellular component organization	13	669	0.0271	Actr3,Capzb,Cfl1,Ctbp1,Dpysl3,Hspa8,Mag,Ntm,Pfn2,Rap1gap2,Slc25a5,Vat1,Vdac2
GO:0006531	aspartate metabolic process	2	10	0.0281	Adssl1,Got2
GO:0060020	Bergmann glial cell differentiation	2	10	0.0281	Abl2,Map2k1
GO:0075522	IRES-dependent viral translational initiation	2	10	0.0281	Eif3f,Pcbp2
GO:1900038	negative regulation of cellular response to hypoxia	2	10	0.0281	Ddah1,Map2k1
GO:1904062	regulation of cation transmembrane transport	8	306	0.029	Atp1b1,Atp1b2,Atp1b3,Cfl1,Dpp6,Gbas,Kcnab2,Wnk2
GO:1902905	positive regulation of supramolecular fiber organization	6	181	0.0292	Actr3,Cfl1,Dstn,Nckap1,Pfn2,Rac1
GO:0042493	response to drug	16	926	0.03	Abat,Adssl1,Atp1a3,Blmh,Cfl1,Eef2,Gad1,Gnai2,Gnao1,Got2,Hp,Pebp1,Prkcg,Qdpr,Rhob,Slc25a5
GO:0030838	positive regulation of actin filament polymerization	4	78	0.0302	Actr3,Nckap1,Pfn2,Rac1
GO:0042133	neurotransmitter metabolic process	4	78	0.0302	Abat,Aldh5a1,Ddah1,Gad1
GO:0044272	sulfur compound biosynthetic process	4	78	0.0302	Adi1,Dlat,Dld,Pdha1
GO:0051701	interaction with host	4	78	0.0302	Ctsb,Gapdh,Rab7,Tcp1
GO:0007409	axonogenesis	8	310	0.0306	Afg3l2,Cnp,L1cam,Rab3a,Rac1,Sept7,Tubb3,Uchl1
GO:0042221	response to chemical	43	3532	0.0306	Abat,Abl2,Actr3,Adh5,Adssl1,Atp1a3,Atp2a2,Blmh,Cfl1,Cnp,Ctsb,Dpysl3,Eef1a1,Eef1a2,Eef2,Gad1,Gapdh,Gnai2,Gnao1,Got2,Gpd1,Gstm5,Hp,Hspa4l,Hsph1,L1cam,Map2k1,P4hb,Pebp1,Pfkp,Pkm,Prdx5,Prkcg,Qdpr,Rac1,Rhob,Rpl23,Ruvbl2,Slc25a5,Syt1,Tubb3,Uqcrc1,Vcp
GO:0008361	regulation of cell size	6	184	0.031	Actr3,Cfl1,L1cam,Mag,Rac1,Rap1gap2
GO:0019058	viral life cycle	4	79	0.0311	Ctsb,Pcbp2,Rab7,Vcp
GO:0006105	succinate metabolic process	2	11	0.0316	Aldh5a1,Sdha
GO:0016192	vesicle-mediated transport	17	1020	0.0316	Abl2,Ap2a1,Ap2a2,Ap2b1,Ap2s1,Ap3d1,Cltc,Cplx1,Gdi2,Hspa8,Rab3a,Rab7,Rac1,Rhob,Rims1,Syt1,Vcp
GO:0034982	mitochondrial protein processing	2	11	0.0316	Afg3l2,Stoml2
GO:0036465	synaptic vesicle recycling	3	39	0.0316	Ap3d1,Rab3a,Syt1
GO:0061615	glycolytic process through fructose-6-phosphate	2	11	0.0316	Aldoa,Pfkp
GO:0097435	supramolecular fiber organization	9	384	0.0325	Abl2,Actr3,Cap2,Cfl1,Dpysl3,Dstn,Fscn1,Kpnb1,Rac1
GO:0010959	regulation of metal ion transport	9	385	0.033	Atp1b1,Atp1b2,Atp1b3,Dpp6,Gbas,Gnai2,Gnao1,Kcnab2,Wnk2
GO:0043954	cellular component maintenance	3	40	0.0331	Abl2,Itpka,Rab3a
GO:0051341	regulation of oxidoreductase activity	4	81	0.0331	Abl2,Gnai2,Hp,Prdx5
GO:0072347	response to anesthetic	4	81	0.0331	Abat,Gnao1,Got2,Prkcg
GO:0019725	cellular homeostasis	14	777	0.0344	Abl2,Afg3l2,Aldoa,Atp1a3,Atp1b1,Atp1b2,Atp1b3,Atp2a2,Dld,Glrx5,P4hb,Prdx5,Rab7,Stoml2
GO:0048667	cell morphogenesis involved in neuron differentiation	9	389	0.0345	Abl2,Afg3l2,Cnp,L1cam,Rab3a,Rac1,Sept7,Tubb3,Uchl1
GO:0097237	cellular response to toxic substance	6	190	0.0345	Adh5,Cfl1,Gstm5,Hp,Prdx5,Rhob
GO:1902903	regulation of supramolecular fiber organization	8	320	0.0351	Actr3,Capzb,Cfl1,Dstn,Hspa8,Nckap1,Pfn2,Rac1
GO:1990748	cellular detoxification	4	83	0.0351	Adh5,Gstm5,Hp,Prdx5
GO:0030836	positive regulation of actin filament depolymerization	2	12	0.0352	Cfl1,Dstn
GO:0033240	positive regulation of cellular amine metabolic process	2	12	0.0352	Abat,Pebp1
GO:0051047	positive regulation of secretion	10	465	0.0356	Abat,Abl2,Cadm1,Gapdh,Gnai2,Rab3a,Rab7,Rims1,Sept5,Syt1
GO:0043903	regulation of symbiosis, encompassing mutualism through parasitism	6	192	0.0358	Cfl1,Gapdh,Hspa8,P4hb,Rab7,Tardbp
GO:0007420	brain development	13	701	0.036	Abat,Abl2,Atp1a3,Cfl1,Cnp,Gnao1,Map2k1,Ogdh,Pebp1,Rac1,Sept4,Smarcc2,Syt1
GO:0010243	response to organonitrogen compound	15	867	0.036	Abat,Atp1a3,Atp2a2,Cfl1,Eef2,Gnao1,Got2,Gpd1,Pebp1,Pkm,Prkcg,Qdpr,Rpl23,Uqcrc1,Vcp
GO:0048666	neuron development	14	783	0.036	Abl2,Afg3l2,Capzb,Cnp,Gnao1,L1cam,Map2k1,Ncdn,Ogdh,Rab3a,Rac1,Sept7,Tubb3,Uchl1
GO:0048167	regulation of synaptic plasticity	6	193	0.0361	Cfl1,Itpka,Ncdn,Rab3a,Rac1,Rims1
GO:0051336	regulation of hydrolase activity	18	1128	0.0361	Abl2,Atp1b1,Atp1b2,Atp1b3,Gapdh,Gdi2,Gnai2,Gnao1,Lxn,Map2k1,Pebp1,Pfn2,Ppp2r1a,Prdx5,Rab3a,Rap1gap2,Serpinb6a,Vcp
GO:1901998	toxin transport	3	42	0.0361	Cct3,Cct7,Tcp1
GO:0051239	regulation of multicellular organismal process	36	2858	0.0363	Abat,Abl2,Actr3,Adk,Afg3l2,Ap2a1,Ap2a2,Ap3d1,Atp1b1,Atp2a2,Cadm1,Celf4,Cfl1,Ddah1,Dpysl3,Eef1a1,Gapdh,Gnai2,Gnao1,Itpka,L1cam,Lzts3,Mag,Map2k1,Ntm,Pebp1,Pfn2,Ppp2r1a,Rac1,Rap1gap2,Rhob,Rims1,Rnh1,Sept7,Syt1,Ube2v2
GO:0044057	regulation of system process	11	546	0.0372	Abat,Adk,Atp1b1,Atp2a2,Celf4,Gnai2,Gnao1,Mag,Map2k1,Pebp1,Rims1
GO:0044262	cellular carbohydrate metabolic process	5	137	0.0377	Itpka,Pfkp,Pgm2,Pygb,Tpi1
GO:0051301	cell division	10	471	0.0377	Actr3,Cfl1,Cltc,Dctn3,Gnai2,Mapre3,Rhob,Sept4,Sept5,Sept7
GO:0007568	aging	7	259	0.0379	Abat,Cnp,Dld,Eef2,Gnao1,Map2k1,Pebp1
GO:0006120	mitochondrial electron transport, NADH to ubiquinone	2	13	0.0389	Dld,Ndufb8
GO:0006464	cellular protein modification process	32	2471	0.0389	Abl2,Adh5,Armt1,Camkv,Cand1,Cfl1,Cops8,Ctbp1,Ddah1,Dld,Eif3f,Gapdh,Glrx5,Hspa8,Itpka,Map2k1,Mdh2,Ndufab1,Ogdh,P4hb,Pebp1,Ppp2r1a,Ppp3r1,Prkcg,Rab3b,Ruvbl2,Uba1,Ube2m,Ube2v2,Uchl1,Vcp,Wnk2
GO:0010882	regulation of cardiac muscle contraction by calcium ion signaling	2	13	0.0389	Atp1b1,Atp2a2
GO:0010918	positive regulation of mitochondrial membrane potential	2	13	0.0389	Stoml2,Vcp
GO:0006812	cation transport	14	795	0.039	Afg3l2,Ap3d1,Atp1a3,Atp1b1,Atp1b2,Atp1b3,Atp2a2,Atp5o,Atp6v1b2,Atp6v1f,Cltc,Cox7a2l,Kcnab2,Stoml2
GO:0009058	biosynthetic process	44	3707	0.039	Abat,Adi1,Adk,Adssl1,Aldoa,Atp5o,Cnp,Ctbp1,Ddah1,Dlat,Dld,Eef1a1,Eef1a2,Eef1g,Eef2,Eif3f,Gad1,Gapdh,Gbas,Gmps,Got2,Gpd1,Hspa8,Itpka,Ndufab1,Ogdh,Pdha1,Pfkp,Pgam1,Pgm2,Pkm,Prps1,Psat1,Qdpr,Rpl23,Rplp1,Rps17,Ruvbl2,Smarcc2,Stoml2,Tardbp,Tpi1,Vars,Vcp
GO:2001233	regulation of apoptotic signaling pathway	9	401	0.0391	Gnai2,Hsph1,Map2k1,P4hb,Ppp2r1a,Sept4,Slc25a5,Tpt1,Vdac2
GO:0016032	viral process	5	140	0.0399	Ctsb,Eif3f,Pcbp2,Rab7,Vcp
GO:0044271	cellular nitrogen compound biosynthetic process	35	2781	0.04	Adk,Adssl1,Aldoa,Atp5o,Cnp,Ctbp1,Ddah1,Dlat,Dld,Eef1a1,Eef1a2,Eef1g,Eef2,Eif3f,Gapdh,Gbas,Gmps,Hspa8,Ogdh,Pdha1,Pfkp,Pgam1,Pkm,Prps1,Qdpr,Rpl23,Rplp1,Rps17,Ruvbl2,Smarcc2,Stoml2,Tardbp,Tpi1,Vars,Vcp
GO:0051289	protein homotetramerization	4	88	0.0401	Aldh5a1,Aldoa,Pfkp,Pkm
GO:0072329	monocarboxylic acid catabolic process	4	88	0.0401	Acaa1a,Aldh5a1,Echs1,Etfa
GO:0000302	response to reactive oxygen species	6	200	0.0407	Cfl1,Eef2,Gnao1,Hp,Prdx5,Rhob
GO:0044794	positive regulation by host of viral process	2	14	0.0429	Cfl1,Hspa8
GO:2000651	positive regulation of sodium ion transmembrane transporter activity	2	14	0.0429	Atp1b1,Wnk2
GO:0009066	aspartate family amino acid metabolic process	3	46	0.0433	Adi1,Adssl1,Got2
GO:0051493	regulation of cytoskeleton organization	10	484	0.0433	Actr3,Capzb,Cfl1,Cltc,Dstn,Fscn1,Hsph1,Nckap1,Pfn2,Rac1
GO:1903827	regulation of cellular protein localization	10	484	0.0433	Actr3,Ap2b1,Cct3,Cct7,Cfl1,Cltc,Dpp6,Hsph1,Kcnab2,Tcp1
GO:2001243	negative regulation of intrinsic apoptotic signaling pathway	4	91	0.0439	Hsph1,Map2k1,Tpt1,Vdac2
GO:0071702	organic substance transport	24	1716	0.0442	Ap2a1,Ap2a2,Ap2b1,Ap2s1,Ap3d1,Cfl1,Cltc,Cplx1,Gdi2,Got2,Hspa8,Kpnb1,Ppp3r1,Rab3a,Rab3b,Rab7,Rhob,Rims1,Samm50,Selenbp1,Slc25a5,Tcp1,Vcp,Ywhaq
GO:0055085	transmembrane transport	17	1073	0.0452	Afg3l2,Atp1a3,Atp1b1,Atp1b2,Atp1b3,Atp2a2,Atp5o,Atp6v1b2,Atp6v1f,Cox7a2l,Hspa8,Kcnab2,Slc25a3,Slc25a5,Stoml2,Vdac2,Vdac3
GO:0071805	potassium ion transmembrane transport	5	146	0.0456	Atp1a3,Atp1b1,Atp1b2,Atp1b3,Kcnab2
GO:1903530	regulation of secretion by cell	13	733	0.0471	Abat,Abl2,Atp2a2,Cadm1,Gapdh,Gnai2,Pfn2,Rab3a,Rab3b,Rab7,Rims1,Sept5,Syt1
GO:0000281	mitotic cytokinesis	3	48	0.0472	Cfl1,Rhob,Sept7
GO:0030834	regulation of actin filament depolymerization	3	48	0.0472	Capzb,Cfl1,Dstn
GO:0051495	positive regulation of cytoskeleton organization	6	208	0.0472	Actr3,Cfl1,Dstn,Nckap1,Pfn2,Rac1
GO:1901576	organic substance biosynthetic process	43	3651	0.0472	Abat,Adi1,Adk,Adssl1,Aldoa,Atp5o,Cnp,Ctbp1,Dlat,Dld,Eef1a1,Eef1a2,Eef1g,Eef2,Eif3f,Gad1,Gapdh,Gbas,Gmps,Got2,Gpd1,Hspa8,Itpka,Ndufab1,Ogdh,Pdha1,Pfkp,Pgam1,Pgm2,Pkm,Prps1,Psat1,Qdpr,Rpl23,Rplp1,Rps17,Ruvbl2,Smarcc2,Stoml2,Tardbp,Tpi1,Vars,Vcp
GO:0017038	protein import	5	148	0.0473	Cfl1,Hspa8,Kpnb1,Ppp3r1,Samm50
GO:0042552	myelination	4	95	0.0492	Adam22,Afg3l2,Mag,Ppp3r1
GO:0048708	astrocyte differentiation	3	49	0.0492	Abl2,Actr3,Map2k1

## Sheet: S3
	S3. Table S3 The Cell Component (CC) Associated with the Differentially Expressed Proteins in the AD/WT Group.
	Se-methylselenocysteine (SMC) Improves Cognitive Deficits by Attenuating Synaptic and Metabolic Abnormalities in Alzheimer's Mice Model: A Proteomic Study Xiubo Du1#, Qingqing Shi1#, Yuxi Zhao1, Yongli Xie1, Xuexia Li1, Qiong Liu1, Javed Iqbal1, Huajie Zhang1,2, Xukun Liu1,3, Liming Shen1* 1Shenzhen Key Laboratory of Marine Biotechnology and Ecology, College of Life Science and Oceanography, Shen…
#term ID	Term description	Observed gene count	Background gene count	False discovery rate	Matching proteins
GO:0005737	cytoplasm	163	9909	1.62e-34	Abat,Abl2,Acaa1a,Actr3,Adh5,Adi1,Adk,Adssl1,Afg3l2,Aldh5a1,Aldoa,Anks1b,Ap2a1,Ap2a2,Ap2b1,Ap2s1,Ap3d1,Atl3,Atp1a3,Atp1b2,Atp1b3,Atp2a2,Atp5o,Atp6v1b2,Atp6v1f,Bdh1,Blmh,Cadm1,Camkv,Cand1,Cap2,Capzb,Cct3,Cct7,Celf4,Cfl1,Cisd1,Ckmt1,Cltc,Cnp,Cops8,Cox7a2l,Cplx1,Crip2,Cs,Ctbp1,Ctsb,Ctsd,Dctn3,Dlat,Dld,Dnajc11,Dpysl3,Dstn,Echs1,Eef1a1,Eef1a2,Eef1g,Eef2,Efr3b,Eif3f,Etfa,Fscn1,Gad1,Gapdh,Gbas,Gdi2,Glrx5…
GO:0044444	cytoplasmic part	145	7673	5.18e-33	Abat,Abl2,Acaa1a,Actr3,Adh5,Adk,Afg3l2,Aldh5a1,Aldoa,Anks1b,Ap2a1,Ap2a2,Ap2b1,Ap2s1,Ap3d1,Atl3,Atp1a3,Atp1b3,Atp2a2,Atp5o,Atp6v1b2,Atp6v1f,Bdh1,Cadm1,Camkv,Cand1,Cap2,Capzb,Cct3,Cct7,Cfl1,Cisd1,Ckmt1,Cltc,Cnp,Cops8,Cox7a2l,Cplx1,Crip2,Cs,Ctbp1,Ctsb,Ctsd,Dctn3,Dlat,Dld,Dnajc11,Dpysl3,Dstn,Echs1,Eef1a1,Eef1a2,Eef2,Efr3b,Eif3f,Etfa,Fscn1,Gad1,Gapdh,Gbas,Gdi2,Glrx5,Gmps,Gnai2,Gnaz,Got2,Gpd1,Gstm5,Hp,…
GO:0043209	myelin sheath	36	212	2.07e-32	Aldoa,Atp1a3,Atp1b1,Atp5o,Atp6v1b2,Cct3,Ckmt1,Cltc,Cnp,Dlat,Dld,Eef1a1,Eef1a2,Fscn1,Gapdh,Gdi2,Gnao1,Got2,Hspa8,Mag,Mdh2,Mog,Pdha1,Pebp1,Pgam1,Pkm,Sdha,Sept4,Sept7,Slc25a3,Slc25a5,Tcp1,Uchl1,Uqcrc1,Vcp,Vdac2
GO:0005622	intracellular	169	12462	2.43e-26	Abat,Abl2,Acaa1a,Actr3,Adh5,Adi1,Adk,Adssl1,Afg3l2,Aldh5a1,Aldoa,Anks1b,Ap2a1,Ap2a2,Ap2b1,Ap2s1,Ap3d1,Atl3,Atp1a3,Atp1b1,Atp1b2,Atp1b3,Atp2a2,Atp5o,Atp6v1b2,Atp6v1f,Bdh1,Blmh,Cadm1,Camkv,Cand1,Cap2,Capzb,Cct3,Cct7,Celf4,Cfl1,Cisd1,Ckmt1,Cltc,Cnp,Cops8,Cox7a2l,Cplx1,Crip2,Cs,Ctbp1,Ctsb,Ctsd,Dctn3,Dlat,Dld,Dnajc11,Dpysl3,Dstn,Echs1,Eef1a1,Eef1a2,Eef1g,Eef2,Efr3b,Eif3f,Etfa,Fscn1,Gad1,Gapdh,Gbas,Gdi…
GO:0044424	intracellular part	167	12219	9.61e-26	Abat,Abl2,Acaa1a,Actr3,Adh5,Adi1,Adk,Adssl1,Afg3l2,Aldh5a1,Aldoa,Anks1b,Ap2a1,Ap2a2,Ap2b1,Ap2s1,Ap3d1,Atl3,Atp1a3,Atp1b2,Atp1b3,Atp2a2,Atp5o,Atp6v1b2,Atp6v1f,Bdh1,Blmh,Cadm1,Camkv,Cand1,Cap2,Capzb,Cct3,Cct7,Celf4,Cfl1,Cisd1,Ckmt1,Cltc,Cnp,Cops8,Cox7a2l,Cplx1,Crip2,Cs,Ctbp1,Ctsb,Ctsd,Dctn3,Dlat,Dld,Dnajc11,Dpysl3,Dstn,Echs1,Eef1a1,Eef1a2,Eef1g,Eef2,Efr3b,Eif3f,Etfa,Fscn1,Gad1,Gapdh,Gbas,Gdi2,Glrx5…
GO:0044464	cell part	173	14017	9.59e-23	Abat,Abl2,Acaa1a,Actr3,Adam22,Adh5,Adi1,Adk,Adssl1,Afg3l2,Aldh5a1,Aldoa,Anks1b,Ap2a1,Ap2a2,Ap2b1,Ap2s1,Ap3d1,Atl3,Atp1a3,Atp1b1,Atp1b2,Atp1b3,Atp2a2,Atp5o,Atp6v1b2,Atp6v1f,Bdh1,Blmh,Cadm1,Camkv,Cand1,Cap2,Capzb,Cct3,Cct7,Celf4,Cfl1,Cisd1,Ckmt1,Cltc,Cnp,Cops8,Cox7a2l,Cplx1,Crip2,Cs,Ctbp1,Ctsb,Ctsd,Dctn3,Dlat,Dld,Dnajc11,Dpp6,Dpysl3,Dstn,Echs1,Eef1a1,Eef1a2,Eef1g,Eef2,Efr3b,Eif3f,Etfa,Fscn1,Gad1,Ga…
GO:0097458	neuron part	57	1732	3.66e-18	Abat,Abl2,Adam22,Anks1b,Ap2a2,Ap3d1,Atp1a3,Cadm1,Cap2,Capzb,Cfl1,Ckmt1,Cltc,Cplx1,Ctbp1,Dpp6,Dpysl3,Eef1a2,Fscn1,Gad1,Glrx5,Gnai2,Gnao1,Gnaz,Got2,Hspa8,Itpka,Kcnab2,L1cam,Lzts3,Mag,Map2k1,Ncdn,Ndufs7,Ntm,Pebp1,Pfn2,Pkm,Ppp2r1a,Prkcg,Pygb,Qdpr,Rab3a,Rab3b,Rab7,Rac1,Rap1gap2,Rims1,Sept5,Sept7,Smarcc2,Syt1,Tubb3,Uchl1,Vdac2,Vdac3,Wdr7
GO:0044429	mitochondrial part	39	854	2.76e-16	Abat,Afg3l2,Atp5o,Bdh1,Cfl1,Cisd1,Ckmt1,Cnp,Cox7a2l,Cs,Dlat,Dld,Dnajc11,Echs1,Etfa,Gbas,Glrx5,Got2,Marc2,Mdh2,Ndufab1,Ndufb10,Ndufb8,Ndufs2,Ndufs7,Ndufs8,Ndufv1,Ogdh,Pdha1,Pebp1,Samm50,Sdha,Slc25a3,Slc25a5,Stoml2,Uqcrc1,Vat1,Vdac2,Vdac3
GO:0032991	protein-containing complex	90	4701	2.52e-15	Abat,Actr3,Afg3l2,Aldoa,Ap2a1,Ap2a2,Ap2b1,Ap2s1,Ap3d1,Atp1a3,Atp1b1,Atp1b2,Atp1b3,Atp2a2,Atp5o,Atp6v1b2,Atp6v1f,Cand1,Capzb,Cct3,Cct7,Cltc,Cops8,Cox7a2l,Cplx1,Ctbp1,Dctn3,Dlat,Dld,Dnajc11,Dpp6,Dpysl3,Eef1a2,Eef2,Eif3f,Etfa,Fscn1,Gapdh,Gnai2,Gnao1,Gnaz,Got2,Gpd1,Hp,Hspa8,Hsph1,Kcnab2,Kpnb1,Nckap1,Ndufab1,Ndufb10,Ndufb8,Ndufs2,Ndufs7,Ndufs8,Ndufv1,Ogdh,P4hb,Pdha1,Pfkp,Pkm,Ppp2r1a,Ppp3r1,Prps1,Rab3a…
GO:0005739	mitochondrion	46	1312	2.66e-15	Abat,Adh5,Afg3l2,Aldh5a1,Aldoa,Atp5o,Bdh1,Cfl1,Cisd1,Ckmt1,Cnp,Cox7a2l,Cs,Dlat,Dld,Dnajc11,Echs1,Etfa,Gbas,Glrx5,Got2,Kbp,Map2k1,Marc2,Mdh2,Ndufab1,Ndufb10,Ndufb8,Ndufs2,Ndufs7,Ndufs8,Ndufv1,Ogdh,Pdha1,Pebp1,Samm50,Sdha,Sept4,Slc25a3,Slc25a5,Stoml2,Uba1,Uqcrc1,Vat1,Vdac2,Vdac3
GO:0005829	cytosol	72	3326	4.41e-14	Adk,Aldoa,Anks1b,Atp6v1b2,Cand1,Cct3,Cct7,Cfl1,Cltc,Cnp,Cops8,Cplx1,Ctbp1,Dctn3,Dpysl3,Eef1a1,Eef2,Efr3b,Fscn1,Gapdh,Gmps,Gnai2,Gnaz,Gpd1,Gstm5,Hspa4l,Hspa8,Hsph1,Kcnab2,Kpnb1,Map2k1,Map7d1,Ncald,Ncdn,Ndufab1,Ndufv1,Pcbp2,Pfkp,Pfn2,Pgam1,Pgm2,Pkm,Ppp2r1a,Ppp3r1,Prdx5,Prkcg,Psat1,Qdpr,Rab3a,Rab3b,Rab7,Rac1,Rap1gap2,Rap2b,Rhob,Rnh1,Rpl23,Rplp1,Rps17,Ruvbl2,Selenbp1,Syt1,Tcp1,Tpi1,Tpt1,Uba1,Uchl1,Uq…
GO:0098796	membrane protein complex	39	1009	4.41e-14	Afg3l2,Ap2a1,Ap2a2,Ap2b1,Ap2s1,Ap3d1,Atp1a3,Atp1b1,Atp1b2,Atp1b3,Atp2a2,Atp5o,Atp6v1b2,Atp6v1f,Cltc,Cox7a2l,Cplx1,Dnajc11,Dpp6,Gnai2,Gnao1,Gnaz,Kcnab2,Ndufab1,Ndufb10,Ndufb8,Ndufs2,Ndufs7,Ndufs8,Ndufv1,Rab7,Samm50,Sdha,Stoml2,Syt1,Uqcrc1,Vcp,Vdac2,Vdac3
GO:1990204	oxidoreductase complex	16	103	9.58e-14	Dlat,Dld,Etfa,Gpd1,Ndufab1,Ndufb10,Ndufb8,Ndufs2,Ndufs7,Ndufs8,Ndufv1,Ogdh,P4hb,Pdha1,Sdha,Uqcrc1
GO:0031966	mitochondrial membrane	28	539	7.15e-13	Afg3l2,Atp5o,Bdh1,Cfl1,Cisd1,Ckmt1,Cnp,Cox7a2l,Dnajc11,Gbas,Marc2,Ndufab1,Ndufb10,Ndufb8,Ndufs2,Ndufs7,Ndufs8,Ndufv1,Ogdh,Pebp1,Samm50,Sdha,Slc25a3,Slc25a5,Uqcrc1,Vat1,Vdac2,Vdac3
GO:0005740	mitochondrial envelope	29	590	8.39e-13	Afg3l2,Atp5o,Bdh1,Cfl1,Cisd1,Ckmt1,Cnp,Cox7a2l,Dnajc11,Gbas,Marc2,Ndufab1,Ndufb10,Ndufb8,Ndufs2,Ndufs7,Ndufs8,Ndufv1,Ogdh,Pebp1,Samm50,Sdha,Slc25a3,Slc25a5,Stoml2,Uqcrc1,Vat1,Vdac2,Vdac3
GO:0045202	synapse	36	968	1.46e-12	Abl2,Actr3,Anks1b,Ap2a2,Ap3d1,Atp1a3,Atp2a2,Cadm1,Cap2,Capzb,Cfl1,Cltc,Cplx1,Ctbp1,Gad1,Hspa8,Itpka,Kcnab2,L1cam,Lzts3,Ndufs7,Ntm,Pebp1,Pfn2,Prkcg,Rab3a,Rab3b,Rab7,Rac1,Rims1,Sept5,Sept7,Syt1,Vdac2,Vdac3,Wdr7
GO:0044456	synapse part	33	809	1.58e-12	Abl2,Anks1b,Ap2a2,Ap3d1,Atp1a3,Cadm1,Cap2,Capzb,Cfl1,Cltc,Cplx1,Ctbp1,Gad1,Hspa8,Itpka,Kcnab2,L1cam,Lzts3,Ndufs7,Pebp1,Pfn2,Prkcg,Rab3a,Rab3b,Rab7,Rac1,Rims1,Sept5,Sept7,Syt1,Vdac2,Vdac3,Wdr7
GO:0120025	plasma membrane bounded cell projection	54	2172	2.37e-12	Abat,Abl2,Actr3,Adam22,Aldoa,Anks1b,Ap2a1,Ap3d1,Atp1a3,Atp6v1b2,Cadm1,Capzb,Cfl1,Cltc,Cnp,Cplx1,Dld,Dpysl3,Eef1a1,Fscn1,Gad1,Glrx5,Gnai2,Gnao1,Gnaz,Gstm5,Hspa8,Itpka,Kcnab2,L1cam,Lzts3,Mag,Map2k1,Ncdn,Nckap1,Ndufs7,Ntm,Pebp1,Pfn2,Pkm,Ppp2r1a,Prkcg,Pygb,Qdpr,Rab3a,Rab7,Rac1,Rap1gap2,Sept4,Sept5,Sept7,Syt1,Tubb3,Uchl1
GO:0043005	neuron projection	43	1429	3.36e-12	Abat,Abl2,Adam22,Anks1b,Ap3d1,Atp1a3,Cadm1,Capzb,Cfl1,Cltc,Cplx1,Dpysl3,Fscn1,Gad1,Glrx5,Gnai2,Gnao1,Gnaz,Hspa8,Itpka,Kcnab2,L1cam,Lzts3,Mag,Map2k1,Ncdn,Ndufs7,Ntm,Pebp1,Pfn2,Ppp2r1a,Prkcg,Pygb,Qdpr,Rab3a,Rab7,Rac1,Rap1gap2,Sept5,Sept7,Syt1,Tubb3,Uchl1
GO:0043226	organelle	138	10897	4.29e-12	Abat,Abl2,Acaa1a,Actr3,Adh5,Adi1,Adk,Afg3l2,Aldh5a1,Aldoa,Anks1b,Ap2a1,Ap2a2,Ap2b1,Ap2s1,Ap3d1,Atl3,Atp1a3,Atp1b3,Atp2a2,Atp5o,Atp6v1b2,Atp6v1f,Bdh1,Cadm1,Camkv,Cand1,Cap2,Capzb,Cct3,Cct7,Celf4,Cfl1,Cisd1,Ckmt1,Cltc,Cnp,Cops8,Cox7a2l,Cs,Ctbp1,Ctsb,Ctsd,Dctn3,Dlat,Dld,Dnajc11,Dpysl3,Dstn,Echs1,Eef1a1,Eef1a2,Eef1g,Eef2,Etfa,Fscn1,Gapdh,Gbas,Gdi2,Glrx5,Gnai2,Got2,Gstm5,Hnrnpul2,Hp,Hspa4l,Hspa8,Hsph1…
GO:0043229	intracellular organelle	136	10645	4.68e-12	Abat,Abl2,Acaa1a,Actr3,Adh5,Adi1,Adk,Afg3l2,Aldh5a1,Aldoa,Anks1b,Ap2a1,Ap2a2,Ap2b1,Ap2s1,Ap3d1,Atl3,Atp1a3,Atp1b3,Atp2a2,Atp5o,Atp6v1b2,Atp6v1f,Bdh1,Cadm1,Camkv,Cand1,Cap2,Capzb,Cct3,Cct7,Celf4,Cfl1,Cisd1,Ckmt1,Cltc,Cnp,Cops8,Cox7a2l,Cs,Ctbp1,Ctsb,Ctsd,Dctn3,Dlat,Dld,Dnajc11,Dpysl3,Dstn,Echs1,Eef1a1,Eef1a2,Eef1g,Eef2,Etfa,Fscn1,Gapdh,Gbas,Gdi2,Glrx5,Gnai2,Got2,Hnrnpul2,Hp,Hspa4l,Hspa8,Hsph1,Isoc2…
GO:0120038	plasma membrane bounded cell projection part	43	1532	2.74e-11	Abl2,Actr3,Aldoa,Anks1b,Ap2a1,Ap3d1,Atp1a3,Cadm1,Capzb,Cfl1,Cltc,Cplx1,Dpysl3,Eef1a1,Fscn1,Gad1,Glrx5,Gnai2,Gnao1,Gnaz,Gstm5,Hspa8,Itpka,Kcnab2,L1cam,Lzts3,Mag,Map2k1,Ncdn,Nckap1,Pebp1,Pfn2,Ppp2r1a,Prkcg,Rab3a,Rab7,Rac1,Sept4,Sept5,Sept7,Syt1,Tubb3,Uchl1
GO:0044446	intracellular organelle part	106	7416	1.55e-10	Abat,Acaa1a,Actr3,Adk,Afg3l2,Aldoa,Ap2a2,Ap2b1,Ap2s1,Ap3d1,Atl3,Atp2a2,Atp5o,Atp6v1f,Bdh1,Camkv,Cand1,Cap2,Capzb,Cct3,Cct7,Cfl1,Cisd1,Ckmt1,Cltc,Cnp,Cops8,Cox7a2l,Cs,Ctbp1,Ctsb,Dctn3,Dlat,Dld,Dnajc11,Dpysl3,Dstn,Echs1,Eef1a1,Etfa,Fscn1,Gapdh,Gbas,Glrx5,Gnai2,Got2,Hnrnpul2,Hspa8,Hsph1,Kpnb1,Map2k1,Map7d1,Mapre3,Marc2,Mdh2,Nckap1,Ndufab1,Ndufb10,Ndufb8,Ndufs2,Ndufs7,Ndufs8,Ndufv1,Ogdh,P4hb,Pcbp2,Pd…
GO:0044422	organelle part	108	7665	1.86e-10	Abat,Acaa1a,Actr3,Adk,Afg3l2,Aldoa,Ap2a2,Ap2b1,Ap2s1,Ap3d1,Atl3,Atp2a2,Atp5o,Atp6v1f,Bdh1,Camkv,Cand1,Cap2,Capzb,Cct3,Cct7,Cfl1,Cisd1,Ckmt1,Cltc,Cnp,Cops8,Cox7a2l,Cs,Ctbp1,Ctsb,Dctn3,Dlat,Dld,Dnajc11,Dpysl3,Dstn,Echs1,Eef1a1,Etfa,Fscn1,Gapdh,Gbas,Glrx5,Gnai2,Got2,Gstm5,Hnrnpul2,Hspa8,Hsph1,Kpnb1,Map2k1,Map7d1,Mapre3,Marc2,Mdh2,Nckap1,Ndufab1,Ndufb10,Ndufb8,Ndufs2,Ndufs7,Ndufs8,Ndufv1,Ogdh,P4hb,Pc…
GO:0098793	presynapse	22	429	3.78e-10	Ap2a2,Ap3d1,Cadm1,Cltc,Cplx1,Ctbp1,Gad1,Hspa8,Kcnab2,L1cam,Pebp1,Pfn2,Rab3a,Rab3b,Rab7,Rims1,Sept5,Sept7,Syt1,Vdac2,Vdac3,Wdr7
GO:1902494	catalytic complex	37	1266	3.82e-10	Abat,Afg3l2,Atp1a3,Atp1b1,Atp1b2,Atp1b3,Atp2a2,Cand1,Dlat,Dld,Etfa,Gnai2,Gnao1,Gnaz,Gpd1,Hspa8,Ndufab1,Ndufb10,Ndufb8,Ndufs2,Ndufs7,Ndufs8,Ndufv1,Ogdh,P4hb,Pdha1,Pfkp,Pkm,Ppp2r1a,Ppp3r1,Prps1,Ruvbl2,Sdha,Smarcc2,Ube2v2,Uqcrc1,Vcp
GO:0044455	mitochondrial membrane part	16	212	1.15e-09	Afg3l2,Atp5o,Bdh1,Ckmt1,Cox7a2l,Dnajc11,Ndufab1,Ndufb10,Ndufb8,Ndufs2,Ndufs7,Ndufs8,Ndufv1,Samm50,Sdha,Uqcrc1
GO:0031967	organelle envelope	32	1015	1.61e-09	Afg3l2,Atp5o,Bdh1,Cfl1,Cisd1,Ckmt1,Cnp,Cox7a2l,Dnajc11,Gapdh,Gbas,Kpnb1,Marc2,Ndufab1,Ndufb10,Ndufb8,Ndufs2,Ndufs7,Ndufs8,Ndufv1,Ogdh,Pebp1,Rap1gap2,Samm50,Sdha,Slc25a3,Slc25a5,Stoml2,Uqcrc1,Vat1,Vdac2,Vdac3
GO:0098800	inner mitochondrial membrane protein complex	13	131	3.06e-09	Afg3l2,Atp5o,Cox7a2l,Dnajc11,Ndufab1,Ndufb10,Ndufb8,Ndufs2,Ndufs7,Ndufs8,Ndufv1,Sdha,Uqcrc1
GO:0030424	axon	26	712	5.36e-09	Adam22,Ap3d1,Atp1a3,Cadm1,Cfl1,Cltc,Cplx1,Dpysl3,Fscn1,Gad1,Hspa8,Kcnab2,L1cam,Mag,Map2k1,Ntm,Pebp1,Pfn2,Pygb,Rab3a,Rab7,Sept5,Sept7,Syt1,Tubb3,Uchl1
GO:0005743	mitochondrial inner membrane	18	321	5.87e-09	Afg3l2,Atp5o,Bdh1,Ckmt1,Cnp,Cox7a2l,Dnajc11,Ndufab1,Ndufb10,Ndufb8,Ndufs2,Ndufs7,Ndufs8,Ndufv1,Sdha,Slc25a3,Slc25a5,Uqcrc1
GO:0044306	neuron projection terminus	15	206	6.18e-09	Ap3d1,Cltc,Cplx1,Gad1,Hspa8,Kcnab2,L1cam,Pebp1,Pfn2,Rab3a,Rab7,Sept5,Sept7,Syt1,Uchl1
GO:0098805	whole membrane	35	1300	9.86e-09	Ap2a2,Ap2b1,Ap2s1,Ap3d1,Atp1b1,Atp1b3,Atp6v1f,Cisd1,Cltc,Cnp,Ctsd,Dnajc11,Eef2,Gbas,Gnai2,Hspa8,L1cam,Mag,Marc2,Mog,Pebp1,Rab3a,Rab3b,Rab7,Rac1,Rap2b,Rhob,Samm50,Slc25a5,Stoml2,Syt1,Uba1,Vat1,Vdac2,Vdac3
GO:0098798	mitochondrial protein complex	16	255	1.16e-08	Afg3l2,Atp5o,Cox7a2l,Dlat,Dnajc11,Etfa,Ndufab1,Ndufb10,Ndufb8,Ndufs2,Ndufs7,Ndufs8,Ndufv1,Samm50,Sdha,Uqcrc1
GO:0043679	axon terminus	14	188	1.7e-08	Ap3d1,Cltc,Cplx1,Gad1,Hspa8,Kcnab2,L1cam,Pebp1,Pfn2,Rab3a,Rab7,Sept5,Sept7,Syt1
GO:0016020	membrane	101	7460	1.86e-08	Abl2,Actr3,Adam22,Adi1,Adssl1,Afg3l2,Aldoa,Anks1b,Ap2a1,Ap2a2,Ap2b1,Ap2s1,Ap3d1,Atl3,Atp1a3,Atp1b1,Atp1b2,Atp1b3,Atp2a2,Atp5o,Atp6v1b2,Atp6v1f,Bdh1,Cadm1,Camkv,Cap2,Capzb,Cct3,Cfl1,Cisd1,Ckmt1,Cltc,Cnp,Cox7a2l,Cplx1,Ctsb,Ctsd,Dctn3,Dnajc11,Dpp6,Eef1a1,Eef2,Efr3b,Fscn1,Gapdh,Gbas,Gdi2,Gnai2,Gnao1,Gnaz,Got2,Hspa8,Kcnab2,Kpnb1,L1cam,Lzts3,Mag,Map2k1,Marc2,Mdh2,Mog,Nckap1,Ndufab1,Ndufb10,Ndufb8,Ndufs…
GO:0005746	mitochondrial respirasome	10	79	3.85e-08	Cox7a2l,Ndufab1,Ndufb10,Ndufb8,Ndufs2,Ndufs7,Ndufs8,Ndufv1,Sdha,Uqcrc1
GO:0033267	axon part	20	472	5.02e-08	Ap3d1,Cadm1,Cfl1,Cltc,Cplx1,Dpysl3,Fscn1,Gad1,Hspa8,Kcnab2,L1cam,Mag,Pebp1,Pfn2,Rab3a,Rab7,Sept5,Sept7,Syt1,Uchl1
GO:0036477	somatodendritic compartment	29	990	5.02e-08	Abl2,Anks1b,Atp1a3,Cadm1,Capzb,Cfl1,Ckmt1,Cplx1,Dpp6,Eef1a2,Fscn1,Glrx5,Gnai2,Gnao1,Gnaz,Got2,Hspa8,Itpka,L1cam,Lzts3,Map2k1,Ncdn,Ndufs7,Pebp1,Ppp2r1a,Prkcg,Rac1,Tubb3,Uchl1
GO:0031090	organelle membrane	52	2740	5.94e-08	Actr3,Afg3l2,Ap2a2,Ap2b1,Ap2s1,Ap3d1,Atl3,Atp2a2,Atp5o,Atp6v1f,Bdh1,Camkv,Cfl1,Cisd1,Ckmt1,Cltc,Cnp,Cox7a2l,Dnajc11,Gapdh,Gbas,Hspa8,Kpnb1,Marc2,Ndufab1,Ndufb10,Ndufb8,Ndufs2,Ndufs7,Ndufs8,Ndufv1,Ogdh,Pebp1,Rab3a,Rab3b,Rab7,Rac1,Rap1gap2,Rap2b,Rhob,Samm50,Sdha,Slc25a3,Slc25a5,Syt1,Uba1,Uchl1,Uqcrc1,Vat1,Vcp,Vdac2,Vdac3
GO:0044297	cell body	25	776	1.01e-07	Atp1a3,Capzb,Cct3,Cct7,Cfl1,Ckmt1,Cplx1,Dpp6,Dpysl3,Eef1a2,Glrx5,Gnai2,Gnao1,Gnaz,Got2,Hspa8,L1cam,Map2k1,Ncdn,Ndufs7,Pebp1,Sept7,Tcp1,Tubb3,Uchl1
GO:0150034	distal axon	17	378	3.08e-07	Ap3d1,Cfl1,Cltc,Cplx1,Dpysl3,Fscn1,Gad1,Hspa8,Kcnab2,L1cam,Pebp1,Pfn2,Rab3a,Rab7,Sept5,Sept7,Syt1
GO:0042470	melanosome	10	103	3.32e-07	Atp1b3,Atp6v1b2,Cltc,Cnp,Ctsb,Ctsd,Hspa8,P4hb,Rab7,Rac1
GO:0043227	membrane-bounded organelle	117	9775	3.69e-07	Abat,Abl2,Acaa1a,Actr3,Adh5,Adi1,Adk,Afg3l2,Aldh5a1,Aldoa,Anks1b,Ap2a1,Ap2a2,Ap2b1,Ap2s1,Ap3d1,Atl3,Atp1a3,Atp1b3,Atp2a2,Atp5o,Atp6v1b2,Atp6v1f,Bdh1,Cadm1,Camkv,Cand1,Celf4,Cfl1,Cisd1,Ckmt1,Cltc,Cnp,Cops8,Cox7a2l,Cs,Ctbp1,Ctsb,Ctsd,Dctn3,Dlat,Dld,Dnajc11,Echs1,Eef1a1,Eef1a2,Eef1g,Etfa,Gapdh,Gbas,Gdi2,Glrx5,Gnai2,Got2,Hnrnpul2,Hp,Hspa4l,Hspa8,Hsph1,Isoc2a,Kbp,Kpnb1,L1cam,Map2k1,Marc2,Mdh2,Ndufab1,…
GO:0098803	respiratory chain complex	9	78	3.99e-07	Ndufab1,Ndufb10,Ndufb8,Ndufs2,Ndufs7,Ndufs8,Ndufv1,Sdha,Uqcrc1
GO:0043195	terminal bouton	10	116	8.7e-07	Ap3d1,Cltc,Cplx1,Hspa8,L1cam,Pfn2,Rab3a,Rab7,Sept5,Syt1
GO:0030425	dendrite	22	694	9.76e-07	Abl2,Anks1b,Atp1a3,Cadm1,Capzb,Cfl1,Cplx1,Fscn1,Glrx5,Gnai2,Gnao1,Gnaz,Hspa8,Itpka,L1cam,Lzts3,Map2k1,Ncdn,Ppp2r1a,Prkcg,Rac1,Tubb3
GO:0031982	vesicle	38	1837	1.18e-06	Abl2,Aldoa,Ap2a1,Ap2a2,Ap2b1,Ap2s1,Ap3d1,Atp1b3,Atp2a2,Atp6v1b2,Cadm1,Camkv,Cltc,Cnp,Ctsb,Ctsd,Dld,Hspa8,L1cam,Map2k1,P4hb,Pebp1,Prdx5,Rab3a,Rab3b,Rab7,Rac1,Rap2b,Rhob,Rims1,Sept5,Syt1,Tcp1,Tpt1,Uba1,Vdac2,Vdac3,Wdr7
GO:0071944	cell periphery	67	4443	1.29e-06	Abl2,Adam22,Adi1,Anks1b,Ap2a1,Ap2a2,Ap2b1,Ap2s1,Ap3d1,Atp1a3,Atp1b1,Atp1b2,Atp1b3,Atp2a2,Atp5o,Atp6v1b2,Cadm1,Camkv,Cap2,Capzb,Cct3,Cfl1,Cltc,Cnp,Crip2,Ctsb,Dctn3,Dpp6,Dstn,Eef1a1,Eef2,Efr3b,Fscn1,Gad1,Gapdh,Gnai2,Gnao1,Gnaz,Got2,Hspa8,Kcnab2,L1cam,Lzts3,Mag,Map2k1,Nckap1,Ndufs7,Ntm,P4hb,Ppp2r1a,Ppp3r1,Prkcg,Rab3a,Rab3b,Rac1,Rap1gap2,Rap2b,Rhob,Rims1,Sept4,Sept5,Sept7,Stoml2,Syt1,Tubb3,Uchl1,Wnk2
GO:0005747	mitochondrial respiratory chain complex I	7	46	2.22e-06	Ndufab1,Ndufb10,Ndufb8,Ndufs2,Ndufs7,Ndufs8,Ndufv1
GO:0090533	cation-transporting ATPase complex	5	13	2.37e-06	Atp1a3,Atp1b1,Atp1b2,Atp1b3,Atp2a2
GO:0005856	cytoskeleton	38	1933	3.77e-06	Abl2,Actr3,Aldoa,Cap2,Capzb,Cct3,Cct7,Cfl1,Cltc,Cnp,Dctn3,Dpysl3,Dstn,Eef1a1,Fscn1,Gapdh,Gnai2,Hspa8,Kbp,Kcnab2,Lzts3,Map2k1,Map7d1,Mapre3,Nckap1,Pfn2,Pgm2,Rac1,Rap1gap2,Ruvbl2,Sept4,Sept5,Sept7,Slc25a5,Stoml2,Tcp1,Tuba4a,Tubb3
GO:0015629	actin cytoskeleton	16	410	3.85e-06	Abl2,Actr3,Aldoa,Cap2,Capzb,Cfl1,Dctn3,Dpysl3,Dstn,Eef1a1,Fscn1,Nckap1,Pgm2,Sept5,Sept7,Stoml2
GO:1904949	ATPase complex	8	77	3.95e-06	Atp1a3,Atp1b1,Atp1b2,Atp1b3,Atp2a2,Ruvbl2,Smarcc2,Vcp
GO:0031410	cytoplasmic vesicle	35	1710	4.47e-06	Abl2,Ap2a1,Ap2a2,Ap2b1,Ap2s1,Ap3d1,Atp1b3,Atp6v1b2,Cadm1,Camkv,Cltc,Cnp,Ctsb,Ctsd,Dld,Hspa8,L1cam,Map2k1,P4hb,Pebp1,Prdx5,Rab3a,Rab3b,Rab7,Rac1,Rap2b,Rhob,Sept5,Syt1,Tcp1,Tpt1,Uba1,Vdac2,Vdac3,Wdr7
GO:0008021	synaptic vesicle	11	183	4.71e-06	Ap2a2,Cadm1,Hspa8,Pebp1,Rab3a,Rab3b,Sept5,Syt1,Vdac2,Vdac3,Wdr7
GO:0005759	mitochondrial matrix	14	327	6.66e-06	Abat,Bdh1,Cs,Dlat,Dld,Echs1,Etfa,Glrx5,Got2,Mdh2,Ogdh,Pdha1,Slc25a5,Vdac2
GO:0005741	mitochondrial outer membrane	10	165	1.37e-05	Cisd1,Cnp,Dnajc11,Gbas,Marc2,Pebp1,Samm50,Vat1,Vdac2,Vdac3
GO:0005938	cell cortex	12	261	1.97e-05	Cap2,Capzb,Cfl1,Crip2,Dstn,Eef1a1,Gad1,Map2k1,Rims1,Sept4,Sept5,Sept7
GO:0044425	membrane part	77	5857	2.02e-05	Abl2,Adam22,Afg3l2,Anks1b,Ap2a1,Ap2a2,Ap2b1,Ap2s1,Ap3d1,Atl3,Atp1a3,Atp1b1,Atp1b2,Atp1b3,Atp2a2,Atp5o,Atp6v1b2,Atp6v1f,Bdh1,Cadm1,Cfl1,Cisd1,Ckmt1,Cltc,Cox7a2l,Cplx1,Ctsb,Ctsd,Dctn3,Dnajc11,Dpp6,Eef1a1,Eef2,Fscn1,Gnai2,Gnao1,Gnaz,Got2,Hspa8,Kcnab2,L1cam,Lzts3,Mag,Mog,Nckap1,Ndufab1,Ndufb10,Ndufb8,Ndufs2,Ndufs7,Ndufs8,Ndufv1,Ntm,P4hb,Ppp2r1a,Prkcg,Rab3a,Rab3b,Rab7,Rac1,Rap2b,Rhob,Rims1,Samm50,Sdha…
GO:0044448	cell cortex part	9	136	2.21e-05	Cap2,Capzb,Cfl1,Dstn,Eef1a1,Rims1,Sept4,Sept5,Sept7
GO:0005890	sodium:potassium-exchanging ATPase complex	4	10	2.89e-05	Atp1a3,Atp1b1,Atp1b2,Atp1b3
GO:0005886	plasma membrane	61	4328	4.61e-05	Abl2,Adam22,Adi1,Anks1b,Ap2a1,Ap2a2,Ap2b1,Ap2s1,Ap3d1,Atp1a3,Atp1b1,Atp1b2,Atp1b3,Atp2a2,Atp5o,Atp6v1b2,Cadm1,Camkv,Cap2,Cct3,Cfl1,Cltc,Cnp,Ctsb,Dctn3,Dpp6,Eef1a1,Eef2,Efr3b,Fscn1,Gapdh,Gnai2,Gnao1,Gnaz,Got2,Hspa8,Kcnab2,L1cam,Lzts3,Mag,Map2k1,Nckap1,Ndufs7,Ntm,P4hb,Ppp2r1a,Ppp3r1,Prkcg,Rab3a,Rab3b,Rac1,Rap1gap2,Rap2b,Rhob,Rims1,Sept5,Sept7,Stoml2,Syt1,Uchl1,Wnk2
GO:0043231	intracellular membrane-bounded organelle	104	9088	5.81e-05	Abat,Acaa1a,Actr3,Adh5,Adi1,Adk,Afg3l2,Aldh5a1,Aldoa,Anks1b,Ap2b1,Ap3d1,Atl3,Atp1a3,Atp2a2,Atp5o,Atp6v1b2,Atp6v1f,Bdh1,Cand1,Celf4,Cfl1,Cisd1,Ckmt1,Cltc,Cnp,Cops8,Cox7a2l,Cs,Ctbp1,Ctsb,Ctsd,Dctn3,Dlat,Dld,Dnajc11,Echs1,Eef1a1,Eef1a2,Eef1g,Etfa,Gapdh,Gbas,Gdi2,Glrx5,Gnai2,Got2,Hnrnpul2,Hp,Hspa4l,Hspa8,Hsph1,Isoc2a,Kbp,Kpnb1,Map2k1,Marc2,Mdh2,Ndufab1,Ndufb10,Ndufb8,Ndufs2,Ndufs7,Ndufs8,Ndufv1,Ogdh,…
GO:0044430	cytoskeletal part	29	1460	7.1e-05	Actr3,Cap2,Capzb,Cct3,Cct7,Cfl1,Cltc,Cnp,Dctn3,Dpysl3,Dstn,Eef1a1,Fscn1,Gnai2,Hspa8,Map2k1,Map7d1,Mapre3,Nckap1,Rac1,Rap1gap2,Ruvbl2,Sept4,Sept5,Sept7,Slc25a5,Tcp1,Tuba4a,Tubb3
GO:0030133	transport vesicle	12	320	0.00012	Ap2a2,Cadm1,Cltc,Hspa8,Pebp1,Rab3a,Rab3b,Sept5,Syt1,Vdac2,Vdac3,Wdr7
GO:0044459	plasma membrane part	39	2362	0.00012	Abl2,Anks1b,Ap2a1,Ap2a2,Ap2b1,Ap2s1,Atp1a3,Atp1b1,Atp1b2,Atp1b3,Atp2a2,Cadm1,Cfl1,Cltc,Ctsb,Dctn3,Dpp6,Eef1a1,Fscn1,Gnai2,Gnao1,Gnaz,Got2,Kcnab2,L1cam,Lzts3,Mag,Nckap1,Ndufs7,P4hb,Ppp2r1a,Prkcg,Rac1,Rhob,Rims1,Sept5,Sept7,Stoml2,Syt1
GO:0045121	membrane raft	13	374	0.00012	Atp1b1,Atp1b3,Ctsd,Eef2,Gnai2,Hspa8,L1cam,Mag,Mog,Rap2b,Slc25a5,Stoml2,Vdac2
GO:0099568	cytoplasmic region	14	439	0.00014	Ap3d1,Cap2,Capzb,Cfl1,Crip2,Dstn,Eef1a1,Gad1,Map2k1,Rims1,Sept4,Sept5,Sept7,Uchl1
GO:0043232	intracellular non-membrane-bounded organelle	54	3809	0.00016	Abl2,Actr3,Aldoa,Cap2,Capzb,Cct3,Cct7,Cfl1,Cltc,Cnp,Cox7a2l,Ctsb,Dctn3,Dpysl3,Dstn,Eef1a1,Eef2,Fscn1,Gapdh,Gnai2,Hspa8,Kbp,Kcnab2,Kpnb1,Lzts3,Map2k1,Map7d1,Mapre3,Nckap1,Pdha1,Pfn2,Pgm2,Ppp2r1a,Rab7,Rac1,Rap1gap2,Rpl23,Rplp1,Rps17,Ruvbl2,Sdha,Selenbp1,Sept4,Sept5,Sept7,Slc25a5,Smarcc2,Stoml2,Tcp1,Tuba4a,Tubb3,Uba1,Vcp,Vdac2
GO:0030132	clathrin coat of coated pit	4	18	0.00017	Ap2a2,Ap2b1,Ap2s1,Cltc
GO:0101031	chaperone complex	4	18	0.00017	Cct3,Cct7,Hspa8,Tcp1
GO:0098794	postsynapse	15	514	0.00018	Abl2,Anks1b,Ap3d1,Atp1a3,Cadm1,Cap2,Capzb,Cfl1,Hspa8,Itpka,Kcnab2,Lzts3,Prkcg,Rac1,Rims1
GO:0098797	plasma membrane protein complex	14	461	0.00022	Ap2a2,Ap2b1,Ap2s1,Atp1a3,Atp1b1,Atp1b2,Atp1b3,Cltc,Dpp6,Gnai2,Gnao1,Gnaz,Kcnab2,Stoml2
GO:0099503	secretory vesicle	15	525	0.00022	Ap2a1,Ap2a2,Cadm1,Dld,Hspa8,Pebp1,Rab3a,Rab3b,Rab7,Sept5,Syt1,Tcp1,Vdac2,Vdac3,Wdr7
GO:0031105	septin complex	3	6	0.00025	Sept4,Sept5,Sept7
GO:0043197	dendritic spine	9	193	0.00025	Abl2,Anks1b,Atp1a3,Capzb,Cfl1,Hspa8,Itpka,Lzts3,Rac1
GO:0030118	clathrin coat	5	47	0.00036	Ap2a1,Ap2a2,Ap2b1,Ap2s1,Cltc
GO:0030125	clathrin vesicle coat	4	23	0.00036	Ap2a2,Ap2b1,Ap2s1,Cltc
GO:0043025	neuronal cell body	17	688	0.00037	Atp1a3,Capzb,Cfl1,Ckmt1,Cplx1,Dpp6,Eef1a2,Glrx5,Got2,Hspa8,L1cam,Map2k1,Ncdn,Ndufs7,Pebp1,Tubb3,Uchl1
GO:0045254	pyruvate dehydrogenase complex	3	8	0.00045	Dlat,Dld,Pdha1
GO:0019897	extrinsic component of plasma membrane	8	164	0.00046	Abl2,Atp2a2,Gnai2,Gnao1,Gnaz,Kcnab2,Rac1,Stoml2
GO:0030117	membrane coat	6	87	0.0006	Ap2a1,Ap2a2,Ap2b1,Ap2s1,Ap3d1,Cltc
GO:0098588	bounding membrane of organelle	27	1513	0.00068	Actr3,Ap2a2,Ap2b1,Ap2s1,Ap3d1,Atp2a2,Atp6v1f,Cisd1,Cltc,Cnp,Dnajc11,Gbas,Hspa8,Marc2,Pebp1,Rab3a,Rab3b,Rab7,Rac1,Rap2b,Rhob,Samm50,Syt1,Uba1,Vat1,Vdac2,Vdac3
GO:0005832	chaperonin-containing T-complex	3	10	0.00073	Cct3,Cct7,Tcp1
GO:0030131	clathrin adaptor complex	4	29	0.00073	Ap2a1,Ap2a2,Ap2b1,Ap2s1
GO:0098590	plasma membrane region	22	1115	0.00075	Anks1b,Ap2a1,Atp1b1,Atp1b2,Atp1b3,Cadm1,Cfl1,Ctsb,Dctn3,Eef1a1,Fscn1,L1cam,Lzts3,Nckap1,Ndufs7,Prkcg,Rac1,Rhob,Rims1,Sept5,Sept7,Syt1
GO:0070013	intracellular organelle lumen	52	3882	0.00082	Abat,Acaa1a,Adk,Aldoa,Atp2a2,Bdh1,Cand1,Cfl1,Cnp,Cops8,Cox7a2l,Cs,Ctbp1,Ctsb,Dctn3,Dlat,Dld,Echs1,Eef1a1,Etfa,Glrx5,Gnai2,Got2,Hnrnpul2,Hspa8,Hsph1,Kpnb1,Mdh2,Ndufab1,Ndufs2,Ogdh,P4hb,Pcbp2,Pdha1,Prdx5,Rnh1,Rpl23,Ruvbl2,Sdha,Selenbp1,Sept4,Slc25a5,Smarcc2,Stoml2,Tardbp,Tcp1,Tpt1,Uba1,Ube2v2,Uchl1,Vcp,Vdac2
GO:0005905	clathrin-coated pit	5	62	0.0011	Ap2a1,Ap2a2,Ap2b1,Ap2s1,Cltc
GO:0030027	lamellipodium	8	189	0.0011	Abl2,Actr3,Capzb,Cfl1,Dpysl3,Fscn1,Nckap1,Rac1
GO:0030122	AP-2 adaptor complex	3	12	0.0011	Ap2a2,Ap2b1,Ap2s1
GO:0097223	sperm part	9	243	0.0011	Actr3,Aldoa,Dld,Gstm5,Rab3a,Sept4,Sept7,Tcp1,Vdac2
GO:0002199	zona pellucida receptor complex	3	13	0.0013	Cct3,Cct7,Tcp1
GO:0099513	polymeric cytoskeletal fiber	14	581	0.0017	Capzb,Cct3,Cct7,Cltc,Cnp,Dctn3,Dpysl3,Fscn1,Hspa8,Mapre3,Nckap1,Tcp1,Tuba4a,Tubb3
GO:0001401	SAM complex	2	2	0.0018	Dnajc11,Samm50
GO:0031234	extrinsic component of cytoplasmic side of plasma membrane	6	111	0.0018	Abl2,Atp2a2,Gnai2,Gnao1,Gnaz,Kcnab2
GO:0019898	extrinsic component of membrane	9	273	0.0023	Abl2,Atp2a2,Gnai2,Gnao1,Gnaz,Kcnab2,Rab7,Rac1,Stoml2
GO:0001726	ruffle	7	168	0.0026	Actr3,Atp6v1b2,Cfl1,Eef1a1,Fscn1,Nckap1,Rac1
GO:0044445	cytosolic part	8	228	0.0031	Cct3,Cct7,Hspa8,Pfkp,Rpl23,Rplp1,Rps17,Tcp1
GO:0030863	cortical cytoskeleton	5	85	0.0036	Cap2,Capzb,Cfl1,Dstn,Eef1a1
GO:0032154	cleavage furrow	4	53	0.005	Dctn3,Rhob,Sept5,Sept7
GO:0048471	perinuclear region of cytoplasm	15	730	0.005	Actr3,Atp2a2,Capzb,Cnp,Cops8,Ctsb,Dctn3,Hspa8,Map2k1,Mapre3,Ntm,Prdx5,Prkcg,Rab3b,Vcp
GO:0099512	supramolecular fiber	16	809	0.005	Aldoa,Capzb,Cct3,Cct7,Cltc,Cnp,Dctn3,Dpysl3,Fscn1,Hspa8,Mapre3,Nckap1,Pgm2,Tcp1,Tuba4a,Tubb3
GO:0030864	cortical actin cytoskeleton	4	54	0.0052	Cap2,Cfl1,Dstn,Eef1a1
GO:0005874	microtubule	10	377	0.0053	Cct3,Cct7,Cltc,Cnp,Dctn3,Hspa8,Mapre3,Tcp1,Tuba4a,Tubb3
GO:0097227	sperm annulus	2	5	0.0054	Sept4,Sept7
GO:0044433	cytoplasmic vesicle part	15	746	0.0057	Ap2a2,Ap2b1,Ap2s1,Ap3d1,Camkv,Cltc,Dld,Rab3a,Rab3b,Rab7,Rac1,Rap2b,Rhob,Syt1,Uba1
GO:0031941	filamentous actin	3	25	0.0058	Dpysl3,Fscn1,Nckap1
GO:0042383	sarcolemma	6	147	0.0062	Atp1a3,Atp1b1,Cltc,Ctsb,Got2,Ppp3r1
GO:0031252	cell leading edge	10	393	0.0069	Abl2,Actr3,Atp6v1b2,Capzb,Cfl1,Dpysl3,Eef1a1,Fscn1,Nckap1,Rac1
GO:0035749	myelin sheath adaxonal region	2	6	0.0069	Cnp,Mag
GO:0045252	oxoglutarate dehydrogenase complex	2	6	0.0069	Dld,Ogdh
GO:0014069	postsynaptic density	8	267	0.0072	Anks1b,Cadm1,Cap2,Hspa8,Kcnab2,Lzts3,Prkcg,Rims1
GO:0098563	intrinsic component of synaptic vesicle membrane	3	28	0.0074	Rab3a,Rab3b,Syt1
GO:0015630	microtubule cytoskeleton	19	1106	0.0077	Cct3,Cct7,Cltc,Cnp,Dctn3,Gapdh,Gnai2,Hspa8,Map2k1,Map7d1,Mapre3,Rac1,Rap1gap2,Ruvbl2,Sept7,Slc25a5,Tcp1,Tuba4a,Tubb3
GO:0033180	proton-transporting V-type ATPase, V1 domain	2	7	0.0082	Atp6v1b2,Atp6v1f
GO:0030666	endocytic vesicle membrane	4	65	0.0086	Ap2a2,Ap2b1,Ap2s1,Rab7
GO:0005834	heterotrimeric G-protein complex	3	31	0.0093	Gnai2,Gnao1,Gnaz
GO:0030136	clathrin-coated vesicle	5	113	0.0098	Ap2a1,Ap2a2,Ap2b1,Ap2s1,Cltc
GO:0032432	actin filament bundle	4	72	0.0119	Cfl1,Fscn1,Sept5,Sept7
GO:0098993	anchored component of synaptic vesicle membrane	2	9	0.0119	Rab3a,Rab3b
GO:0012506	vesicle membrane	10	449	0.0151	Ap2a2,Ap2b1,Ap2s1,Atp2a2,Camkv,Cltc,Rab3a,Rab3b,Rab7,Syt1
GO:0060076	excitatory synapse	3	39	0.0161	Actr3,Ntm,Syt1
GO:0005884	actin filament	4	80	0.0163	Capzb,Dpysl3,Fscn1,Nckap1
GO:0035686	sperm fibrous sheath	2	12	0.0185	Aldoa,Gstm5
GO:0016469	proton-transporting two-sector ATPase complex	3	46	0.0237	Atp5o,Atp6v1b2,Atp6v1f
GO:0097060	synaptic membrane	8	339	0.0245	Anks1b,Cfl1,L1cam,Lzts3,Ndufs7,Prkcg,Rims1,Syt1
GO:1902495	transmembrane transporter complex	7	273	0.0258	Atp1a3,Atp1b1,Atp1b2,Atp1b3,Atp2a2,Dpp6,Kcnab2
GO:0005911	cell-cell junction	9	417	0.0263	Actr3,Atp1b1,Cadm1,Capzb,Cfl1,Fscn1,Prkcg,Rap2b,Uba1
GO:0030659	cytoplasmic vesicle membrane	9	424	0.0287	Ap2a2,Ap2b1,Ap2s1,Camkv,Cltc,Rab3a,Rab3b,Rab7,Syt1
GO:0046930	pore complex	2	16	0.0287	Vdac2,Vdac3
GO:0061827	sperm head	2	16	0.0287	Actr3,Aldoa
GO:0098552	side of membrane	10	514	0.0334	Abl2,Atp2a2,Bdh1,Ctsb,Gnai2,Gnao1,Gnaz,Kcnab2,L1cam,P4hb
GO:0000242	pericentriolar material	2	19	0.0379	Rac1,Tcp1
GO:0030141	secretory granule	8	371	0.0382	Ap2a1,Ap2a2,Dld,Rab3a,Rab7,Syt1,Tcp1,Vdac2
GO:0036126	sperm flagellum	4	109	0.0412	Aldoa,Gstm5,Sept4,Sept7
GO:0071782	endoplasmic reticulum tubular network	2	22	0.0477	Atl3,Kpnb1
GO:0001725	stress fiber	3	63	0.0487	Fscn1,Sept5,Sept7

## Sheet: S4
	S4. Table S4 The Molecular Function (MF) Associated with the Differentially Expressed Proteins in the AD/WT Group.
	Se-methylselenocysteine (SMC) Improves Cognitive Deficits by Attenuating Synaptic and Metabolic Abnormalities in Alzheimer's Mice Model: A Proteomic Study Xiubo Du1#, Qingqing Shi1#, Yuxi Zhao1, Yongli Xie1, Xuexia Li1, Qiong Liu1, Javed Iqbal1, Huajie Zhang1,2, Xukun Liu1,3, Liming Shen1* 1Shenzhen Key Laboratory of Marine Biotechnology and Ecology, College of Life Science and Oceanography, Shen…
#term ID	Term description	Observed gene count	Background gene count	False discovery rate	Matching proteins
GO:0036094	small molecule binding	74	2364	1.23e-22	Abat,Abl2,Actr3,Adh5,Adk,Adssl1,Afg3l2,Aldh5a1,Aldoa,Atl3,Atp1a3,Atp1b1,Atp2a2,Atp6v1b2,Camkv,Cct3,Cct7,Ckmt1,Cnp,Ctbp1,Ddah1,Dld,Eef1a1,Eef1a2,Eef2,Etfa,Gad1,Gapdh,Gmps,Gnai2,Gnao1,Gnaz,Got2,Gpd1,Hspa4l,Hspa8,Hsph1,Itpka,L1cam,Mag,Map2k1,Marc2,Ndufab1,Ndufs2,Ndufv1,Ogdh,Pebp1,Pfkp,Pkm,Prkcg,Prps1,Pygb,Qdpr,Rab3a,Rab3b,Rab7,Rac1,Rap2b,Rhob,Ruvbl2,Sdha,Sept4,Sept5,Sept7,Tcp1,Tuba4a,Tubb3,Uba1,Ube2…
GO:0043168	anion binding	75	2578	2.09e-21	Abat,Abl2,Actr3,Adh5,Adk,Adssl1,Afg3l2,Aldh5a1,Ap2a2,Atl3,Atp1a3,Atp1b1,Atp2a2,Atp6v1b2,Bdh1,Camkv,Cct3,Cct7,Cfl1,Ckmt1,Ddah1,Dld,Dpysl3,Eef1a1,Eef1a2,Eef2,Etfa,Gad1,Gmps,Gnai2,Gnao1,Gnaz,Got2,Gstm5,Hspa4l,Hspa8,Hsph1,Itpka,L1cam,Lxn,Mag,Map2k1,Marc2,Ndufab1,Ndufv1,Ogdh,Pebp1,Pfkp,Pfn2,Pkm,Prkcg,Prps1,Pygb,Qdpr,Rab3a,Rab3b,Rab7,Rac1,Rap2b,Rhob,Ruvbl2,Sdha,Sept4,Sept5,Sept7,Stoml2,Syt1,Tcp1,Tuba4a…
GO:0003824	catalytic activity	104	5239	1.05e-19	Abat,Abl2,Acaa1a,Adam22,Adh5,Adi1,Adk,Adssl1,Afg3l2,Aldh5a1,Aldoa,Armt1,Atl3,Atp1a3,Atp1b1,Atp1b2,Atp1b3,Atp2a2,Atp5o,Atp6v1b2,Atp6v1f,Bdh1,Blmh,Camkv,Ckmt1,Cnp,Cox7a2l,Cs,Ctbp1,Ctsb,Ctsd,Ddah1,Dlat,Dld,Dpp6,Dpysl3,Echs1,Eef1a1,Eef1a2,Eef1g,Eef2,Eif3f,Etfa,Gad1,Gapdh,Gfod1,Glrx5,Gmps,Gnai2,Gnao1,Gnaz,Got2,Gpd1,Gstm5,Hspa8,Isoc2a,Itpka,Kcnab2,Map2k1,Marc2,Mdh2,Ndufb8,Ndufs2,Ndufs7,Ndufs8,Ndufv1,Og…
GO:0000166	nucleotide binding	62	2006	2.28e-18	Abl2,Actr3,Adk,Adssl1,Afg3l2,Aldh5a1,Atl3,Atp1a3,Atp1b1,Atp2a2,Atp6v1b2,Camkv,Cct3,Cct7,Ckmt1,Cnp,Ctbp1,Dld,Eef1a1,Eef1a2,Eef2,Etfa,Gapdh,Gmps,Gnai2,Gnao1,Gnaz,Gpd1,Hspa4l,Hspa8,Hsph1,Itpka,Map2k1,Ndufs2,Ndufv1,Pebp1,Pfkp,Pkm,Prkcg,Prps1,Qdpr,Rab3a,Rab3b,Rab7,Rac1,Rap2b,Rhob,Ruvbl2,Sdha,Sept4,Sept5,Sept7,Tcp1,Tuba4a,Tubb3,Uba1,Ube2m,Vars,Vcp,Vdac2,Vdac3,Wnk2
GO:0005488	binding	146	10884	4.1e-16	Abat,Abl2,Actr3,Adh5,Adi1,Adk,Adssl1,Afg3l2,Aldh5a1,Aldoa,Anks1b,Ap2a1,Ap2a2,Ap2b1,Armt1,Atl3,Atp1a3,Atp1b1,Atp1b2,Atp1b3,Atp2a2,Atp5o,Atp6v1b2,Bdh1,Blmh,Cadm1,Camkv,Cand1,Cap2,Capzb,Cct3,Cct7,Celf4,Cfl1,Cisd1,Ckmt1,Cltc,Cnp,Cplx1,Crip2,Ctbp1,Ctsb,Ctsd,Ddah1,Dlat,Dld,Dpysl3,Dstn,Eef1a1,Eef1a2,Eef1g,Eef2,Eif3f,Etfa,Fscn1,Gad1,Gapdh,Gdi2,Glrx5,Gmps,Gnai2,Gnao1,Gnaz,Got2,Gpd1,Gstm5,Hp,Hspa4l,Hspa8,H…
GO:0005515	protein binding	105	6454	1.03e-13	Abat,Abl2,Actr3,Adh5,Adssl1,Aldoa,Anks1b,Ap2a1,Ap2a2,Ap2b1,Armt1,Atl3,Atp1a3,Atp1b1,Atp1b2,Atp1b3,Atp2a2,Blmh,Cadm1,Camkv,Cand1,Cap2,Capzb,Cct3,Cct7,Cfl1,Cisd1,Ckmt1,Cltc,Cplx1,Ctbp1,Ctsb,Dlat,Dpysl3,Dstn,Eef1a1,Eef1a2,Eef2,Eif3f,Fscn1,Gad1,Gapdh,Gdi2,Gnai2,Gnao1,Gnaz,Got2,Gpd1,Gstm5,Hp,Hspa8,Hsph1,Itpka,Kbp,Kcnab2,Kpnb1,L1cam,Lzts3,Mag,Map2k1,Mapre3,Mdh2,Ncald,Ndufs2,Ndufs7,Ogdh,P4hb,Pcbp2,Pebp1…
GO:0097367	carbohydrate derivative binding	55	2051	1.49e-13	Abl2,Actr3,Adk,Adssl1,Afg3l2,Atl3,Atp1a3,Atp1b1,Atp2a2,Atp6v1b2,Camkv,Cct3,Cct7,Ckmt1,Ctsb,Dpysl3,Eef1a1,Eef1a2,Eef2,Gmps,Gnai2,Gnao1,Gnaz,Hspa4l,Hspa8,Hsph1,Itpka,L1cam,Lxn,Mag,Map2k1,Ndufv1,Pebp1,Pfkp,Pkm,Prkcg,Prps1,Rab3a,Rab3b,Rab7,Rac1,Rap2b,Rhob,Ruvbl2,Sept4,Sept5,Sept7,Tcp1,Tuba4a,Tubb3,Uba1,Ube2m,Vars,Vcp,Wnk2
GO:0035639	purine ribonucleoside triphosphate binding	49	1697	4.69e-13	Abl2,Actr3,Adk,Adssl1,Afg3l2,Atl3,Atp1a3,Atp1b1,Atp2a2,Atp6v1b2,Camkv,Cct3,Cct7,Ckmt1,Eef1a1,Eef1a2,Eef2,Gmps,Gnai2,Gnao1,Gnaz,Hspa4l,Hspa8,Hsph1,Itpka,Map2k1,Pebp1,Pfkp,Pkm,Prkcg,Prps1,Rab3a,Rab3b,Rab7,Rac1,Rap2b,Rhob,Ruvbl2,Sept4,Sept5,Sept7,Tcp1,Tuba4a,Tubb3,Uba1,Ube2m,Vars,Vcp,Wnk2
GO:0032553	ribonucleotide binding	50	1781	6.04e-13	Abl2,Actr3,Adk,Adssl1,Afg3l2,Atl3,Atp1a3,Atp1b1,Atp2a2,Atp6v1b2,Camkv,Cct3,Cct7,Ckmt1,Eef1a1,Eef1a2,Eef2,Gmps,Gnai2,Gnao1,Gnaz,Hspa4l,Hspa8,Hsph1,Itpka,Map2k1,Ndufv1,Pebp1,Pfkp,Pkm,Prkcg,Prps1,Rab3a,Rab3b,Rab7,Rac1,Rap2b,Rhob,Ruvbl2,Sept4,Sept5,Sept7,Tcp1,Tuba4a,Tubb3,Uba1,Ube2m,Vars,Vcp,Wnk2
GO:0032555	purine ribonucleotide binding	49	1766	1.7e-12	Abl2,Actr3,Adk,Adssl1,Afg3l2,Atl3,Atp1a3,Atp1b1,Atp2a2,Atp6v1b2,Camkv,Cct3,Cct7,Ckmt1,Eef1a1,Eef1a2,Eef2,Gmps,Gnai2,Gnao1,Gnaz,Hspa4l,Hspa8,Hsph1,Itpka,Map2k1,Pebp1,Pfkp,Pkm,Prkcg,Prps1,Rab3a,Rab3b,Rab7,Rac1,Rap2b,Rhob,Ruvbl2,Sept4,Sept5,Sept7,Tcp1,Tuba4a,Tubb3,Uba1,Ube2m,Vars,Vcp,Wnk2
GO:0016491	oxidoreductase activity	30	700	1.18e-11	Acaa1a,Adh5,Adi1,Aldh5a1,Bdh1,Cox7a2l,Ctbp1,Dlat,Dld,Etfa,Gapdh,Gfod1,Glrx5,Gpd1,Kcnab2,Marc2,Mdh2,Ndufb8,Ndufs2,Ndufs7,Ndufs8,Ndufv1,Ogdh,P4hb,Pdha1,Prdx5,Qdpr,Sdha,Selenbp1,Vat1
GO:0043167	ion binding	89	5302	1.22e-11	Abat,Abl2,Actr3,Adh5,Adi1,Adk,Adssl1,Afg3l2,Aldh5a1,Ap2a2,Atl3,Atp1a3,Atp1b1,Atp2a2,Atp6v1b2,Bdh1,Camkv,Cct3,Cct7,Cfl1,Cisd1,Ckmt1,Crip2,Ddah1,Dld,Dpysl3,Eef1a1,Eef1a2,Eef2,Etfa,Gad1,Glrx5,Gmps,Gnai2,Gnao1,Gnaz,Got2,Gstm5,Hspa4l,Hspa8,Hsph1,Itpka,L1cam,Lxn,Mag,Map2k1,Marc2,Ncald,Ndufab1,Ndufs2,Ndufs7,Ndufs8,Ndufv1,Ogdh,Pebp1,Pfkp,Pfn2,Pgm2,Pkm,Ppp3r1,Prkcg,Prps1,Pygb,Qdpr,Rab3a,Rab3b,Rab7,Rac1,Ra…
GO:0016462	pyrophosphatase activity	29	753	3.31e-10	Adssl1,Atl3,Atp1a3,Atp1b1,Atp1b2,Atp1b3,Atp2a2,Atp5o,Atp6v1f,Eef1a1,Eef1a2,Eef2,Gmps,Gnai2,Gnao1,Gnaz,Hspa8,Pfn2,Rab3a,Rab3b,Rab7,Rac1,Rap2b,Rhob,Ruvbl2,Sept4,Tuba4a,Tubb3,Vcp
GO:0017111	nucleoside-triphosphatase activity	28	714	4.39e-10	Adssl1,Atl3,Atp1a3,Atp1b1,Atp1b2,Atp1b3,Atp2a2,Atp5o,Atp6v1f,Eef1a1,Eef1a2,Eef2,Gnai2,Gnao1,Gnaz,Hspa8,Pfn2,Rab3a,Rab3b,Rab7,Rac1,Rap2b,Rhob,Ruvbl2,Sept4,Tuba4a,Tubb3,Vcp
GO:0032550	purine ribonucleoside binding	20	343	6.16e-10	Adssl1,Atl3,Eef1a1,Eef1a2,Eef2,Gnai2,Gnao1,Gnaz,Prps1,Rab3a,Rab3b,Rab7,Rac1,Rap2b,Rhob,Sept4,Sept5,Sept7,Tuba4a,Tubb3
GO:0032561	guanyl ribonucleotide binding	20	359	1.1e-09	Adssl1,Atl3,Eef1a1,Eef1a2,Eef2,Gnai2,Gnao1,Gnaz,Prps1,Rab3a,Rab3b,Rab7,Rac1,Rap2b,Rhob,Sept4,Sept5,Sept7,Tuba4a,Tubb3
GO:0019899	enzyme binding	49	2175	1.32e-09	Abat,Actr3,Aldoa,Ap2a1,Ap2a2,Armt1,Atp1b1,Atp1b2,Atp1b3,Atp2a2,Cap2,Cfl1,Cltc,Eef1a1,Eef1a2,Eef2,Gapdh,Gdi2,Got2,Gstm5,Hspa8,Itpka,Kpnb1,Mag,Map2k1,Mapre3,Ndufs2,Ndufs7,P4hb,Pcbp2,Pebp1,Pgam1,Ppp3r1,Rab3a,Rab7,Rac1,Rims1,Rpl23,Ruvbl2,Serpinb6a,Slc25a5,Stoml2,Tcp1,Tpi1,Tuba4a,Ube2v2,Uchl1,Uqcrc1,Vcp
GO:0003924	GTPase activity	17	255	2.24e-09	Adssl1,Atl3,Eef1a1,Eef1a2,Eef2,Gnai2,Gnao1,Gnaz,Rab3a,Rab3b,Rab7,Rac1,Rap2b,Rhob,Sept4,Tuba4a,Tubb3
GO:0005525	GTP binding	19	338	2.57e-09	Adssl1,Atl3,Eef1a1,Eef1a2,Eef2,Gnai2,Gnao1,Gnaz,Rab3a,Rab3b,Rab7,Rac1,Rap2b,Rhob,Sept4,Sept5,Sept7,Tuba4a,Tubb3
GO:0097159	organic cyclic compound binding	78	4818	3.76e-09	Abat,Abl2,Actr3,Adk,Adssl1,Afg3l2,Aldh5a1,Atl3,Atp1a3,Atp1b1,Atp2a2,Atp5o,Atp6v1b2,Camkv,Cct3,Cct7,Celf4,Ckmt1,Cltc,Cnp,Ctbp1,Dld,Eef1a1,Eef1a2,Eef1g,Eef2,Eif3f,Etfa,Gad1,Gapdh,Gmps,Gnai2,Gnao1,Gnaz,Got2,Gpd1,Hspa4l,Hspa8,Hsph1,Itpka,Map2k1,Marc2,Ndufs2,Ndufv1,Ogdh,Pcbp2,Pebp1,Pfkp,Pkm,Prdx5,Prkcg,Prps1,Pygb,Qdpr,Rab3a,Rab3b,Rab7,Rac1,Rap2b,Rhob,Rpl23,Ruvbl2,Sdha,Sept4,Sept5,Sept7,Smarcc2,Tardbp,…
GO:1901363	heterocyclic compound binding	77	4748	4.81e-09	Abat,Abl2,Actr3,Adk,Adssl1,Afg3l2,Aldh5a1,Atl3,Atp1a3,Atp1b1,Atp2a2,Atp6v1b2,Camkv,Cct3,Cct7,Celf4,Ckmt1,Cltc,Cnp,Ctbp1,Dld,Eef1a1,Eef1a2,Eef1g,Eef2,Eif3f,Etfa,Gad1,Gapdh,Gmps,Gnai2,Gnao1,Gnaz,Got2,Gpd1,Hspa4l,Hspa8,Hsph1,Itpka,Map2k1,Marc2,Ndufs2,Ndufv1,Ogdh,Pcbp2,Pebp1,Pfkp,Pkm,Prdx5,Prkcg,Prps1,Pygb,Qdpr,Rab3a,Rab3b,Rab7,Rac1,Rap2b,Rhob,Rpl23,Ruvbl2,Sdha,Sept4,Sept5,Sept7,Smarcc2,Tardbp,Tcp1,T…
GO:0048037	cofactor binding	22	493	4.95e-09	Abat,Aldh5a1,Cisd1,Ctbp1,Dld,Etfa,Gad1,Gapdh,Glrx5,Got2,Gpd1,Gstm5,Marc2,Ndufab1,Ndufs2,Ndufs7,Ndufs8,Ndufv1,Ogdh,Pygb,Qdpr,Sdha
GO:0008144	drug binding	39	1630	3.13e-08	Abat,Abl2,Actr3,Adk,Afg3l2,Atp1a3,Atp1b1,Atp2a2,Atp5o,Atp6v1b2,Camkv,Cct3,Cct7,Ckmt1,Eef1a1,Fscn1,Gad1,Gmps,Got2,Hspa4l,Hspa8,Hsph1,Itpka,Map2k1,Marc2,Pebp1,Pfkp,Pkm,Ppp3r1,Prkcg,Prps1,Pygb,Ruvbl2,Tcp1,Uba1,Ube2m,Vars,Vcp,Wnk2
GO:0050662	coenzyme binding	16	283	6.31e-08	Abat,Aldh5a1,Ctbp1,Dld,Etfa,Gad1,Gapdh,Got2,Gpd1,Marc2,Ndufs2,Ndufv1,Ogdh,Pygb,Qdpr,Sdha
GO:0016787	hydrolase activity	46	2259	1.13e-07	Adam22,Adssl1,Afg3l2,Atl3,Atp1a3,Atp1b1,Atp1b2,Atp1b3,Atp2a2,Atp5o,Atp6v1b2,Atp6v1f,Blmh,Cnp,Ctsb,Ctsd,Ddah1,Dpp6,Dpysl3,Eef1a1,Eef1a2,Eef2,Eif3f,Gmps,Gnai2,Gnao1,Gnaz,Hspa8,Pfn2,Pgam1,Ppp2r1a,Ppp3r1,Rab3a,Rab3b,Rab7,Rac1,Rap2b,Rhob,Ruvbl2,Sept4,Tuba4a,Tubb3,Uchl1,Uqcrc1,Vars,Vcp
GO:0016620	oxidoreductase activity, acting on the aldehyde or oxo group of donors, NAD or NADP as acceptor	7	39	1.53e-06	Adh5,Aldh5a1,Dlat,Dld,Gapdh,Ogdh,Pdha1
GO:0051287	NAD binding	8	66	2.71e-06	Aldh5a1,Ctbp1,Dld,Gapdh,Gpd1,Ndufs2,Ndufv1,Qdpr
GO:0019829	cation-transporting ATPase activity	7	59	1.78e-05	Atp1a3,Atp1b1,Atp1b2,Atp1b3,Atp2a2,Atp5o,Atp6v1f
GO:0005524	ATP binding	30	1389	2.09e-05	Abl2,Actr3,Adk,Afg3l2,Atp1a3,Atp1b1,Atp2a2,Atp6v1b2,Camkv,Cct3,Cct7,Ckmt1,Gmps,Hspa4l,Hspa8,Hsph1,Itpka,Map2k1,Pebp1,Pfkp,Pkm,Prkcg,Prps1,Ruvbl2,Tcp1,Uba1,Ube2m,Vars,Vcp,Wnk2
GO:0042802	identical protein binding	35	1798	2.41e-05	Abat,Adh5,Adssl1,Aldoa,Atl3,Blmh,Cadm1,Cap2,Cct7,Cisd1,Ckmt1,Ctbp1,Dlat,Gapdh,Got2,Gpd1,Gstm5,Hp,L1cam,Mag,Mapre3,Mdh2,Pfkp,Pkm,Prps1,Pygb,Qdpr,Ruvbl2,Sept4,Sept5,Sept7,Syt1,Tardbp,Vcp,Ywhaq
GO:0051536	iron-sulfur cluster binding	7	63	2.41e-05	Abat,Cisd1,Glrx5,Ndufs2,Ndufs7,Ndufs8,Ndufv1
GO:0008092	cytoskeletal protein binding	22	877	5.62e-05	Actr3,Adssl1,Aldoa,Cap2,Capzb,Cfl1,Cltc,Dpysl3,Dstn,Eef2,Fscn1,Gapdh,Hsph1,Kbp,Kpnb1,Mapre3,Ncald,Pfn2,Rab3a,Rab3b,Tpt1,Vbp1
GO:0008137	NADH dehydrogenase (ubiquinone) activity	5	26	6.2e-05	Ndufb8,Ndufs2,Ndufs7,Ndufs8,Ndufv1
GO:0005391	sodium:potassium-exchanging ATPase activity	4	11	6.64e-05	Atp1a3,Atp1b1,Atp1b2,Atp1b3
GO:0044877	protein-containing complex binding	24	1094	0.00016	Actr3,Adssl1,Ap2a1,Ap2a2,Ap2b1,Atp5o,Cfl1,Ctsb,Dstn,Eef2,Fscn1,Gnai2,Gnao1,Gnaz,Kpnb1,L1cam,Nckap1,P4hb,Pfkp,Rab7,Ruvbl2,Slc25a3,Uqcrc1,Vcp
GO:0060590	ATPase regulator activity	5	33	0.00016	Atp1b1,Atp1b2,Atp1b3,Hsph1,Rab3a
GO:0003746	translation elongation factor activity	4	15	0.00017	Eef1a1,Eef1a2,Eef1g,Eef2
GO:0051117	ATPase binding	7	91	0.00017	Actr3,Atp1b1,Atp1b2,Atp1b3,Rab3a,Rac1,Ruvbl2
GO:0019003	GDP binding	6	62	0.00021	Prps1,Rab3b,Rab7,Rap2b,Rhob,Sept5
GO:0030276	clathrin binding	6	62	0.00021	Ap2a1,Ap2a2,Ap2b1,Cltc,Ncald,Syt1
GO:0043531	ADP binding	5	37	0.00023	Hspa8,Pkm,Prps1,Ruvbl2,Vcp
GO:0034604	pyruvate dehydrogenase (NAD+) activity	3	5	0.00029	Dlat,Dld,Pdha1
GO:0033218	amide binding	12	337	0.0003	Atp1a3,Cltc,Ctsb,Ctsd,Dld,Gstm5,Hspa8,Kpnb1,Mag,Ndufab1,Ppp3r1,Tubb3
GO:0015662	ATPase activity, coupled to transmembrane movement of ions, phosphorylative mechanism	5	42	0.00037	Atp1a3,Atp1b1,Atp1b2,Atp1b3,Atp2a2
GO:0001671	ATPase activator activity	4	21	0.00043	Atp1b1,Atp1b2,Atp1b3,Rab3a
GO:0016769	transferase activity, transferring nitrogenous groups	4	24	0.00064	Abat,Gapdh,Got2,Psat1
GO:0031625	ubiquitin protein ligase binding	11	316	0.00068	Hspa8,Ndufs2,Pcbp2,Rpl23,Slc25a5,Tcp1,Tpi1,Ube2v2,Uchl1,Uqcrc1,Vcp
GO:0016651	oxidoreductase activity, acting on NAD(P)H	6	82	0.0007	Dld,Ndufb8,Ndufs2,Ndufs7,Ndufs8,Ndufv1
GO:0030170	pyridoxal phosphate binding	5	51	0.00076	Abat,Gad1,Got2,Marc2,Pygb
GO:0008022	protein C-terminus binding	9	224	0.001	Ap2a1,Atp1b1,Atp2a2,Cltc,Map2k1,Mapre3,Rab3a,Syt1,Ywhaq
GO:0019842	vitamin binding	7	130	0.001	Abat,Gad1,Got2,Marc2,Ndufab1,Ogdh,Pygb
GO:0009055	electron transfer activity	5	65	0.0021	Cox7a2l,Dld,Etfa,Glrx5,Sdha
GO:0031406	carboxylic acid binding	8	198	0.0022	Adh5,Aldh5a1,Ddah1,Gad1,Got2,Hspa8,L1cam,Mag
GO:0016887	ATPase activity	11	372	0.0024	Atp1a3,Atp1b1,Atp1b2,Atp1b3,Atp2a2,Atp5o,Atp6v1f,Hspa8,Pfn2,Ruvbl2,Vcp
GO:0046983	protein dimerization activity	24	1343	0.0024	Abat,Adh5,Adssl1,Cadm1,Ckmt1,Ctbp1,Gad1,Got2,Gpd1,Gstm5,Hp,Mag,Mdh2,P4hb,Ppp2r1a,Prdx5,Prps1,Pygb,Qdpr,Ruvbl2,Sept4,Sept5,Sept7,Syt1
GO:0042803	protein homodimerization activity	18	868	0.0025	Abat,Adh5,Adssl1,Cadm1,Ckmt1,Ctbp1,Got2,Gpd1,Gstm5,Hp,Mag,Mdh2,Prps1,Pygb,Qdpr,Ruvbl2,Sept4,Sept5
GO:0051539	4 iron, 4 sulfur cluster binding	4	39	0.0029	Ndufs2,Ndufs7,Ndufs8,Ndufv1
GO:0019901	protein kinase binding	15	659	0.003	Ap2a1,Ap2a2,Atp1b1,Cltc,Eef1a1,Eef1a2,Eef2,Mag,Map2k1,Mapre3,Pebp1,Pgam1,Rac1,Rims1,Tuba4a
GO:0016616	oxidoreductase activity, acting on the CH-OH group of donors, NAD or NADP as acceptor	6	114	0.0032	Adh5,Bdh1,Ctbp1,Gpd1,Kcnab2,Mdh2
GO:0030234	enzyme regulator activity	18	894	0.0034	Atp1b1,Atp1b2,Atp1b3,Gapdh,Gdi2,Hsph1,Lxn,Map2k1,Pebp1,Ppp2r1a,Prdx5,Rab3a,Rap1gap2,Rnh1,Rpl23,Rplp1,Serpinb6a,Vcp
GO:0008135	translation factor activity, RNA binding	5	77	0.0038	Eef1a1,Eef1a2,Eef1g,Eef2,Eif3f
GO:0042277	peptide binding	9	280	0.0042	Atp1a3,Cltc,Ctsb,Ctsd,Gstm5,Hspa8,Kpnb1,Ppp3r1,Tubb3
GO:0042623	ATPase activity, coupled	9	301	0.0068	Atp1a3,Atp1b1,Atp1b2,Atp1b3,Atp2a2,Atp5o,Atp6v1f,Hspa8,Ruvbl2
GO:0008483	transaminase activity	3	22	0.007	Abat,Got2,Psat1
GO:0008289	lipid binding	14	652	0.0074	Adh5,Ap2a2,Atp5o,Bdh1,Cfl1,Got2,Hspa8,Mag,Pebp1,Pfn2,Sept5,Stoml2,Syt1,Vcp
GO:0030742	GTP-dependent protein binding	3	24	0.0084	Rab3a,Rab3b,Rac1
GO:0031683	G-protein beta/gamma-subunit complex binding	3	25	0.0093	Gnai2,Gnao1,Gnaz
GO:0044183	protein folding chaperone	3	25	0.0093	Cct3,Cct7,Tcp1
GO:0016667	oxidoreductase activity, acting on a sulfur group of donors	4	58	0.01	Dld,Glrx5,P4hb,Selenbp1
GO:0015288	porin activity	2	6	0.0107	Vdac2,Vdac3
GO:0022804	active transmembrane transporter activity	9	329	0.0111	Atp1a3,Atp1b1,Atp1b2,Atp1b3,Atp2a2,Atp5o,Atp6v1f,Slc25a3,Slc25a5
GO:0003779	actin binding	10	397	0.0113	Actr3,Adssl1,Cap2,Capzb,Cfl1,Dstn,Eef2,Fscn1,Ncald,Pfn2
GO:0050750	low-density lipoprotein particle receptor binding	3	28	0.0118	Ap2a1,Cltc,Syt1
GO:0019904	protein domain specific binding	15	775	0.0121	Ap2a2,Cadm1,Cltc,Ctbp1,Dpysl3,Gapdh,Hspa8,Kpnb1,L1cam,Lzts3,Ppp3r1,Rap2b,Rims1,Vcp,Ywhaq
GO:0016624	oxidoreductase activity, acting on the aldehyde or oxo group of donors, disulfide as acceptor	2	7	0.0131	Ogdh,Pdha1
GO:0031821	G protein-coupled serotonin receptor binding	2	7	0.0131	Gnao1,Gnaz
GO:0051015	actin filament binding	6	163	0.0149	Actr3,Adssl1,Cfl1,Dstn,Eef2,Fscn1
GO:0033691	sialic acid binding	2	8	0.0158	L1cam,Mag
GO:0051021	GDP-dissociation inhibitor binding	2	8	0.0158	Rab3a,Rac1
GO:0043621	protein self-association	4	70	0.017	Ctsb,L1cam,Lzts3,Mdh2
GO:0097718	disordered domain specific binding	3	34	0.0179	Ap2a2,Cltc,Gapdh
GO:0016868	intramolecular transferase activity, phosphotransferases	2	9	0.0182	Pgam1,Pgm2
GO:0035615	clathrin adaptor activity	2	9	0.0182	Ap2a1,Ap2a2
GO:0005543	phospholipid binding	9	367	0.0195	Ap2a2,Bdh1,Cfl1,Got2,Hspa8,Pfn2,Sept5,Stoml2,Syt1
GO:0051082	unfolded protein binding	4	77	0.0221	Cct3,Cct7,Hspa8,Tcp1
GO:0072341	modified amino acid binding	4	80	0.025	Gstm5,Hspa8,Ndufab1,Syt1
GO:0015077	monovalent inorganic cation transmembrane transporter activity	8	329	0.0327	Atp1a3,Atp1b1,Atp1b2,Atp1b3,Atp5o,Atp6v1f,Cox7a2l,Kcnab2
GO:0002020	protease binding	5	142	0.0355	Aldoa,Cltc,Ndufs7,Serpinb6a,Vcp
GO:0015079	potassium ion transmembrane transporter activity	5	142	0.0355	Atp1a3,Atp1b1,Atp1b2,Atp1b3,Kcnab2
GO:0030955	potassium ion binding	2	14	0.0359	Atp1b1,Pkm
GO:0048038	quinone binding	2	14	0.0359	Ndufs2,Ndufs7
GO:0008047	enzyme activator activity	9	415	0.039	Atp1b1,Atp1b2,Atp1b3,Gdi2,Map2k1,Rab3a,Rap1gap2,Rplp1,Vcp
GO:0061134	peptidase regulator activity	6	207	0.039	Gapdh,Lxn,Pebp1,Prdx5,Serpinb6a,Vcp
GO:0008308	voltage-gated anion channel activity	2	15	0.0392	Vdac2,Vdac3
GO:0016874	ligase activity	5	148	0.0392	Adssl1,Gmps,Uba1,Uchl1,Vars
GO:0060589	nucleoside-triphosphatase regulator activity	7	274	0.0392	Atp1b1,Atp1b2,Atp1b3,Gdi2,Hsph1,Rab3a,Rap1gap2
GO:0001664	G protein-coupled receptor binding	7	277	0.0408	Atp1a3,Atp2a2,Gnai2,Gnao1,Gnaz,Hspa8,Uchl1
GO:1990381	ubiquitin-specific protease binding	2	16	0.0425	Cltc,Vcp
GO:1901681	sulfur compound binding	6	221	0.0496	Atp1a3,Dld,Dpysl3,Gstm5,Lxn,Ogdh

## Sheet: S5
	S5. Table S5 The KEGG Pathways Associated with the Differentially Expressed Proteins in the AD/WT Group.
	Se-methylselenocysteine (SMC) Improves Cognitive Deficits by Attenuating Synaptic and Metabolic Abnormalities in Alzheimer's Mice Model: A Proteomic Study Xiubo Du1#, Qingqing Shi1#, Yuxi Zhao1, Yongli Xie1, Xuexia Li1, Qiong Liu1, Javed Iqbal1, Huajie Zhang1,2, Xukun Liu1,3, Liming Shen1* 1Shenzhen Key Laboratory of Marine Biotechnology and Ecology, College of Life Science and Oceanography, Shen…
#term ID	Term description	Observed gene count	Background gene count	False discovery rate	Matching proteins
mmu01200	Carbon metabolism	18	118	1.22e-14	Adh5,Aldoa,Cs,Dlat,Dld,Echs1,Gapdh,Got2,Mdh2,Ogdh,Pdha1,Pfkp,Pgam1,Pkm,Prps1,Psat1,Sdha,Tpi1
mmu01100	Metabolic pathways	43	1296	5.15e-13	Abat,Acaa1a,Adh5,Adi1,Adk,Adssl1,Aldh5a1,Aldoa,Atp5o,Atp6v1b2,Atp6v1f,Bdh1,Ckmt1,Cs,Dlat,Dld,Echs1,Gad1,Gapdh,Gmps,Got2,Itpka,Mdh2,Ndufab1,Ndufb10,Ndufb8,Ndufs2,Ndufs7,Ndufs8,Ndufv1,Ogdh,Pdha1,Pfkp,Pgam1,Pgm2,Pkm,Prps1,Psat1,Pygb,Qdpr,Sdha,Tpi1,Uqcrc1
mmu05012	Parkinson's disease	17	138	7.65e-13	Atp5o,Gnai2,Ndufab1,Ndufb10,Ndufb8,Ndufs2,Ndufs7,Ndufs8,Ndufv1,Sdha,Sept5,Slc25a5,Uba1,Uchl1,Uqcrc1,Vdac2,Vdac3
mmu05016	Huntington's disease	18	187	4.58e-12	Ap2a1,Ap2a2,Ap2b1,Ap2s1,Atp5o,Cltc,Ndufab1,Ndufb10,Ndufb8,Ndufs2,Ndufs7,Ndufs8,Ndufv1,Sdha,Slc25a5,Uqcrc1,Vdac2,Vdac3
mmu04721	Synaptic vesicle cycle	11	62	7.76e-10	Ap2a1,Ap2a2,Ap2b1,Ap2s1,Atp6v1b2,Atp6v1f,Cltc,Cplx1,Rab3a,Rims1,Syt1
mmu00010	Glycolysis / Gluconeogenesis	11	65	1.02e-09	Adh5,Aldoa,Dlat,Dld,Gapdh,Pdha1,Pfkp,Pgam1,Pgm2,Pkm,Tpi1
mmu04961	Endocrine and other factor-regulated calcium reabsorption	10	54	3.25e-09	Ap2a1,Ap2a2,Ap2b1,Ap2s1,Atp1a3,Atp1b1,Atp1b2,Atp1b3,Cltc,Prkcg
mmu00190	Oxidative phosphorylation	12	129	5.07e-08	Atp5o,Atp6v1b2,Atp6v1f,Ndufab1,Ndufb10,Ndufb8,Ndufs2,Ndufs7,Ndufs8,Ndufv1,Sdha,Uqcrc1
mmu01230	Biosynthesis of amino acids	10	75	5.07e-08	Aldoa,Cs,Gapdh,Got2,Pfkp,Pgam1,Pkm,Prps1,Psat1,Tpi1
mmu05010	Alzheimer's disease	13	167	6.49e-08	Atp2a2,Atp5o,Gapdh,Ndufab1,Ndufb10,Ndufb8,Ndufs2,Ndufs7,Ndufs8,Ndufv1,Ppp3r1,Sdha,Uqcrc1
mmu00020	Citrate cycle (TCA cycle)	7	32	5.22e-07	Cs,Dlat,Dld,Mdh2,Ogdh,Pdha1,Sdha
mmu04723	Retrograde endocannabinoid signaling	11	145	1.18e-06	Gnai2,Gnao1,Ndufab1,Ndufb10,Ndufb8,Ndufs2,Ndufs7,Ndufs8,Ndufv1,Prkcg,Rims1
mmu04022	cGMP-PKG signaling pathway	11	164	3.51e-06	Atp1a3,Atp1b1,Atp1b2,Atp1b3,Atp2a2,Gnai2,Map2k1,Ppp3r1,Slc25a5,Vdac2,Vdac3
mmu04932	Non-alcoholic fatty liver disease (NAFLD)	10	146	9.86e-06	Ndufab1,Ndufb10,Ndufb8,Ndufs2,Ndufs7,Ndufs8,Ndufv1,Rac1,Sdha,Uqcrc1
mmu04714	Thermogenesis	11	223	5.33e-05	Atp5o,Ndufab1,Ndufb10,Ndufb8,Ndufs2,Ndufs7,Ndufs8,Ndufv1,Sdha,Smarcc2,Uqcrc1
mmu00650	Butanoate metabolism	5	27	7.85e-05	Abat,Aldh5a1,Bdh1,Echs1,Gad1
mmu04919	Thyroid hormone signaling pathway	8	115	9.94e-05	Atp1a3,Atp1b1,Atp1b2,Atp1b3,Atp2a2,Map2k1,Pfkp,Prkcg
mmu04730	Long-term depression	6	60	0.0002	Gnai2,Gnao1,Gnaz,Map2k1,Ppp2r1a,Prkcg
mmu00250	Alanine, aspartate and glutamate metabolism	5	36	0.00023	Abat,Adssl1,Aldh5a1,Gad1,Got2
mmu00620	Pyruvate metabolism	5	38	0.00028	Dlat,Dld,Mdh2,Pdha1,Pkm
mmu04960	Aldosterone-regulated sodium reabsorption	5	38	0.00028	Atp1a3,Atp1b1,Atp1b2,Atp1b3,Prkcg
mmu04972	Pancreatic secretion	7	101	0.00029	Atp1a3,Atp1b1,Atp1b2,Atp1b3,Atp2a2,Prkcg,Rac1
mmu04971	Gastric acid secretion	6	72	0.00041	Atp1a3,Atp1b1,Atp1b2,Atp1b3,Gnai2,Prkcg
mmu04260	Cardiac muscle contraction	6	75	0.00048	Atp1a3,Atp1b1,Atp1b2,Atp1b3,Atp2a2,Uqcrc1
mmu04964	Proximal tubule bicarbonate reclamation	4	22	0.00049	Atp1a3,Atp1b1,Atp1b2,Atp1b3
mmu04911	Insulin secretion	6	85	0.00085	Atp1a3,Atp1b1,Atp1b2,Atp1b3,Prkcg,Rab3a
mmu05134	Legionellosis	5	57	0.0012	Eef1a1,Eef1a2,Eef1g,Hspa8,Vcp
mmu00030	Pentose phosphate pathway	4	32	0.0016	Aldoa,Pfkp,Pgm2,Prps1
mmu04261	Adrenergic signaling in cardiomyocytes	7	140	0.0016	Atp1a3,Atp1b1,Atp1b2,Atp1b3,Atp2a2,Gnai2,Ppp2r1a
mmu04024	cAMP signaling pathway	8	194	0.0018	Atp1a3,Atp1b1,Atp1b2,Atp1b3,Atp2a2,Gnai2,Map2k1,Rac1
mmu05230	Central carbon metabolism in cancer	5	64	0.0018	Map2k1,Pdha1,Pfkp,Pgam1,Pkm
mmu04918	Thyroid hormone synthesis	5	73	0.003	Atp1a3,Atp1b1,Atp1b2,Atp1b3,Prkcg
mmu04973	Carbohydrate digestion and absorption	4	40	0.003	Atp1a3,Atp1b1,Atp1b2,Atp1b3
mmu04970	Salivary secretion	5	75	0.0032	Atp1a3,Atp1b1,Atp1b2,Atp1b3,Prkcg
mmu04071	Sphingolipid signaling pathway	6	120	0.0037	Ctsd,Gnai2,Map2k1,Ppp2r1a,Prkcg,Rac1
mmu04978	Mineral absorption	4	44	0.0038	Atp1a3,Atp1b1,Atp1b2,Atp1b3
mmu04020	Calcium signaling pathway	7	180	0.0051	Atp2a2,Itpka,Ppp3r1,Prkcg,Slc25a5,Vdac2,Vdac3
mmu04540	Gap junction	5	85	0.0051	Gnai2,Map2k1,Prkcg,Tuba4a,Tubb3
mmu04727	GABAergic synapse	5	87	0.0053	Abat,Gad1,Gnai2,Gnao1,Prkcg
mmu00280	Valine, leucine and isoleucine degradation	4	55	0.0075	Abat,Acaa1a,Dld,Echs1
mmu04925	Aldosterone synthesis and secretion	5	97	0.008	Atp1a3,Atp1b1,Atp1b2,Atp1b3,Prkcg
mmu04144	Endocytosis	8	258	0.0082	Ap2a1,Ap2a2,Ap2b1,Ap2s1,Capzb,Cltc,Hspa8,Rab7
mmu04370	VEGF signaling pathway	4	58	0.0083	Map2k1,Ppp3r1,Prkcg,Rac1
mmu04922	Glucagon signaling pathway	5	99	0.0083	Pdha1,Pgam1,Pkm,Ppp3r1,Pygb
mmu04921	Oxytocin signaling pathway	6	149	0.0084	Eef2,Gnai2,Gnao1,Map2k1,Ppp3r1,Prkcg
mmu04066	HIF-1 signaling pathway	5	102	0.0088	Aldoa,Gapdh,Map2k1,Pdha1,Prkcg
mmu00630	Glyoxylate and dicarboxylate metabolism	3	29	0.0104	Cs,Dld,Mdh2
mmu00640	Propanoate metabolism	3	31	0.0121	Abat,Dld,Echs1
mmu00410	beta-Alanine metabolism	3	32	0.0126	Abat,Echs1,Gad1
mmu04145	Phagosome	6	165	0.0126	Atp6v1b2,Atp6v1f,Rab7,Rac1,Tuba4a,Tubb3
mmu04976	Bile secretion	4	71	0.0142	Atp1a3,Atp1b1,Atp1b2,Atp1b3
mmu00051	Fructose and mannose metabolism	3	35	0.0154	Aldoa,Pfkp,Tpi1
mmu00230	Purine metabolism	6	175	0.0155	Adk,Adssl1,Gmps,Pgm2,Pkm,Prps1
mmu00260	Glycine, serine and threonine metabolism	3	40	0.021	Dld,Pgam1,Psat1
mmu04216	Ferroptosis	3	40	0.021	Pcbp2,Vdac2,Vdac3
mmu04915	Estrogen signaling pathway	5	131	0.021	Ctsd,Gnai2,Gnao1,Hspa8,Map2k1
mmu04666	Fc gamma R-mediated phagocytosis	4	83	0.0216	Cfl1,Map2k1,Prkcg,Rac1
mmu04210	Apoptosis	5	135	0.0221	Ctsb,Ctsd,Map2k1,Sept4,Tuba4a
mmu00270	Cysteine and methionine metabolism	3	46	0.0274	Adi1,Got2,Mdh2
mmu04974	Protein digestion and absorption	4	90	0.0274	Atp1a3,Atp1b1,Atp1b2,Atp1b3
mmu04015	Rap1 signaling pathway	6	207	0.0293	Gnai2,Gnao1,Map2k1,Pfn2,Prkcg,Rac1
mmu00071	Fatty acid degradation	3	50	0.0328	Acaa1a,Adh5,Echs1
mmu04916	Melanogenesis	4	98	0.034	Gnai2,Gnao1,Map2k1,Prkcg
mmu04141	Protein processing in endoplasmic reticulum	5	161	0.0402	Hspa4l,Hspa8,Hsph1,P4hb,Vcp
mmu01210	2-Oxocarboxylic acid metabolism	2	19	0.0423	Cs,Got2
mmu04114	Oocyte meiosis	4	112	0.0487	Map2k1,Ppp2r1a,Ppp3r1,Ywhaq
mmu04218	Cellular senescence	5	171	0.0487	Map2k1,Ppp3r1,Slc25a5,Vdac2,Vdac3
mmu04650	Natural killer cell mediated cytotoxicity	4	111	0.0487	Map2k1,Ppp3r1,Prkcg,Rac1
mmu04724	Glutamatergic synapse	4	113	0.0487	Gnai2,Gnao1,Ppp3r1,Prkcg
mmu04725	Cholinergic synapse	4	112	0.0487	Gnai2,Gnao1,Map2k1,Prkcg
mmu04360	Axon guidance	5	174	0.0488	Cfl1,Gnai2,L1cam,Ppp3r1,Rac1
